# Supplementary material for: A new method for α-specific glucosylation and its application to the one-pot synthesis of a branched α-glucan
Source: Royal Society of Chemistry journal article supplement (doi:10.1039/c8qo01177j), 2019-01-01
Supplement: c8qo01177j1.pdf [file c8qo01177j1.pdf]

## ***Supporting Information***

### **A new method for $\alpha$ -specific glucosylation and its application to one-pot synthesis of a branched $\alpha$ -glucan**

Yanxin Zhang,<sup>a</sup> Shihao Zhou,<sup>a</sup> Xiaohan Wang,<sup>a</sup> Han Zhang,<sup>a</sup> Zhongwu Guo<sup>\*ab</sup> and Jian Gao<sup>\*a</sup>

- a. National Glycoengineering Research Center, Shandong Provincial Key Laboratory of Carbohydrate Chemistry and Glycobiology, Shandong University, 72 Binhai Road, Qingdao, Shandong 266237, China
- b. Department of Chemistry, University of Florida, 214 Leigh Hall, Gainesville, Florida 32611, United State

\* Corresponding author. E-mail: zguo@chem.ufl.edu; E-mail: jgao@sdu.edu.cn

### **Table of Contents**

|                                                                    |        |
|--------------------------------------------------------------------|--------|
| I. Experimental procedures -----                                   | S2-24  |
| II. NMR spectra of synthetic intermediates and final products----- | S25-75 |

## I. Experimental procedures

**General methods:** Chemical and materials were purchased from commercial sources and were used as received without further purification unless otherwise noted. Molecular sieve 4Å was flame-dried under high vacuum and cooled under an Argon atmosphere immediately before use. Analytical TLC was carried out on Silica Gel 60Å F254 plates with detection by a UV detector and/or by charring with 15% H<sub>2</sub>SO<sub>4</sub> in EtOH (w/v). Mass spectrometry (MS) was performed on a high resolution ESI-TOF MS machine. NMR spectra were recorded on a 500 or 600 MHz machine with chemical shifts reported in ppm ( $\delta$ ) downfield from internal tetramethylsilane (TMS) reference. Signals are described as s (singlet), d (doublet), t (triplet), or m (multiplet), and the coupling constants are reported in Hz.

**General procedures for preactivation-based glucosylation:** A mixture of donor (0.10 mmol, 1.0 equiv) and freshly activated MS 4Å in anhydrous Et<sub>2</sub>O (5 mL) was stirred at room temperature under Argon atmosphere for 1.0 h and then cooled to -78 °C. A solution of AgOTf (25.7 mg, 0.10 mmol, 1.0 equiv) in Et<sub>2</sub>O (0.2 mL) was added to the reaction mixture. After stirring for fifteen minutes, *p*-TolSCl (14.5  $\mu$ L, 0.10 mmol, 1.0 equiv) was added to the reaction mixture through a microsyringe without touching the flask. Fifteen minutes later, a solution of acceptor (0.09 mmol, 0.9 equiv) in Et<sub>2</sub>O (0.5 mL), which was precooled to -78 °C, was added to the reaction mixture dropwise. The reaction solution was allowed to warm up to room temperature slowly in 1.5 h and stirred for another 15 min. The reaction mixture was then quenched with Et<sub>3</sub>N, diluted with CH<sub>2</sub>Cl<sub>2</sub> (50 mL), and filtered. The filtrate was concentrated under vacuum, and the residue purified by silica gel column chromatography to give product.

### *p*-Tolyl 2,3,4,6-tetra-*O*-benzyl-D-glucopyranosyl-(1 $\rightarrow$ 4)-2,3,6-tri-*O*-benzyl-1-thio- $\beta$ -D-glucopyranoside (**19**)

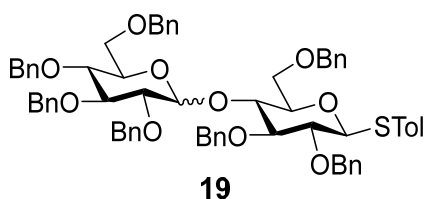

Donor **1** reacted with acceptor **5** by the general procedure for glycosylation to give product **19** (86 mg, 89% yield) as syrup after column purification (hexanes/ethyl acetate, 14:1):  $\alpha/\beta$  = 4:1 as determined by integrations of H-1' and SPhCH<sub>3</sub> signals with the stereochemistry determine by  $J_{H1',H2'}$  coupling constant.  $\alpha$ -**19**:

<sup>1</sup>H NMR (600 MHz, CDCl<sub>3</sub>)  $\delta$ : 7.56 – 7.00 (m, 39H, Ph), 5.64 (d,  $J$  = 3.6 Hz, 1H, H-1'), 4.93 – 4.67 (m, 6H, Bn), 4.62 (d,  $J$  = 10.2 Hz, 1H, H-1), 4.60 – 4.43 (m, 7H, Bn), 4.31 (d,  $J$  = 12.0 Hz, 1H, Bn), 4.09 (t,  $J$  = 9.0 Hz, 1H, H-4), 3.95 – 3.83 (m, 2H, H-3', H-6a), 3.82 – 3.72 (m, 3H, H-3, H-5', H-6b), 3.68 – 3.62 (m, 1H, H-4'), 3.60 – 3.48 (m, 4H, H-2, H-2', H-5, H-6a'), 3.44 – 3.31 (m, 1H, H-6b'), 2.32 (s, 3H, PhCH<sub>3</sub>). <sup>13</sup>C NMR (150 MHz, CDCl<sub>3</sub>)  $\delta$ : 97.05 (C-1'), 87.34 (C-1), 86.78, 82.02, 80.86, 79.28, 78.70, 77.68, 72.52, 71.00, 69.10, 68.15, 21.15 (PhCH<sub>3</sub>). HR ESI-TOF MS ( $m/z$ ): calcd for C<sub>68</sub>H<sub>74</sub>NO<sub>10</sub>S [M + NH<sub>4</sub>]<sup>+</sup>, 1096.5033; found, 1096.5024.

**p-Tolyl****2,3,4,6-tetra-O-benzyl-D-glucopyranosyl-(1→6)-2,3,4-tri-O-benzyl-1-thio-β-D-glucopyranoside (20)**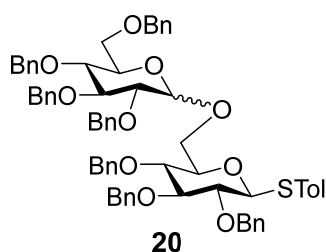

Donor **1** reacted with acceptor **6** by the general procedure for glycosylation to give product **20** (83 mg, 86% yield) as a syrup after column purification (hexanes/ethyl acetate, 14:1):  $\alpha/\beta = 5:1$  as determined by integrations of H-1' and SPhCH<sub>3</sub> signals with the stereochemistry determined by  $J_{H1',H2'}$  coupling constant.  $\alpha$ -**20** (G. Wasonga, Y. Zeng, X. Huang, *Sci. China Chem.* **2011**, *54*, 66-73): <sup>1</sup>H NMR (600 MHz, CDCl<sub>3</sub>)  $\delta$ : 7.49 – 7.00

(m, 39H, Ph), 5.04 (d,  $J = 3.6$  Hz, 1H, H-1'), 5.01 – 4.71 (m, 8H, Bn), 4.69 – 4.41 (m, 7H, Bn, H-1), 4.00 (t,  $J = 9.6$  Hz, 1H, H-3'), 3.90 – 3.87 (m, 1H, H-5'), 3.85 (dd,  $J = 12.0, 4.8$  Hz, 1H, H-6a), 3.78 (d,  $J = 12.0$  Hz, 1H, H-6b), 3.74 – 3.59 (m, 6H, H-3, H-2', H-4, H-4', H-6a', H-6b'), 3.51 – 3.46 (m, 1H, H-5), 3.26 (t,  $J = 9.0$  Hz, 1H, H-2), 2.22 (s, 3H, PhCH<sub>3</sub>). HR ESI-TOF MS ( $m/z$ ): calcd for C<sub>68</sub>H<sub>74</sub>NO<sub>10</sub>S [M + NH<sub>4</sub>]<sup>+</sup>, 1096.5033; found, 1096.5046.

**Methyl 2,3,4,6-tetra-O-benzyl-D-glucopyranosyl-(1→4)-2,3,6-tri-O-benzyl-α-D-glucopyranoside (21)**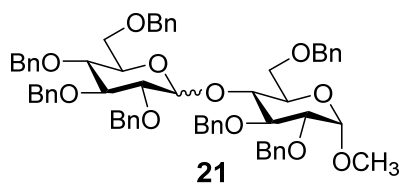

Donor **1** reacted with acceptor **7** by the general procedure for glycosylation to give product **21** (83 mg, 93% yield) as a syrup after column purification (hexanes/ethyl acetate, 13:1):  $\alpha/\beta = 3:1$  as determined by integrations of H-1' and OCH<sub>3</sub> signals with the

stereochemistry determined by  $J_{H1',H2'}$  coupling constant.  $\alpha$ -**21**: <sup>1</sup>H NMR (600 MHz, CDCl<sub>3</sub>)  $\delta$ : 7.50 – 7.05 (m, 35H, Ph), 5.73 (d,  $J = 3.6$  Hz, 1H, H-1'), 5.07 (d,  $J = 11.4$  Hz, 1H, Bn), 4.94 – 4.76 (m, 4H, Bn), 4.73 (d,  $J = 12.0$  Hz, 1H, Bn), 4.67 – 4.50 (m, 6H, Bn, H-1), 4.48 – 4.38 (m, 2H, Bn), 4.30 (d,  $J = 12.0$  Hz, 1H, Bn), 4.14 – 4.05 (m, 2H, H-3, H-4), 3.94 (t,  $J = 9.6$  Hz, 1H, H-3'), 3.90 – 3.82 (m, 2H, H-5, H-6a), 3.76 – 3.60 (m, 4H, H-2, H-4', H-5', H-6b), 3.58 – 3.48 (m, 2H, H-2', H-6a'), 3.43 – 3.41 (m, 1H, H-6b'), 3.40 (s, 3H, OCH<sub>3</sub>). <sup>13</sup>C NMR (150 MHz, CDCl<sub>3</sub>)  $\delta$ : 97.78 (C-1), 96.65 (C-1'), 82.07, 82.05, 80.21, 79.46, 77.64, 72.27, 70.97, 69.53, 69.02, 68.15, 55.17 (OCH<sub>3</sub>). HR ESI-TOF MS ( $m/z$ ): calcd for C<sub>62</sub>H<sub>70</sub>NO<sub>11</sub> [M + NH<sub>4</sub>]<sup>+</sup>, 1004.4949; found, 1004.4943.

**Methyl 2,3,4,6-tetra-O-benzyl-D-glucopyranosyl-(1→6)-2,3,4-tri-O-benzyl-α-D-glucopyranoside (22)**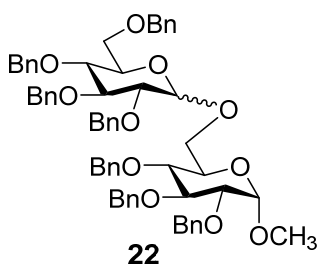

Donor **1** reacted with acceptor **8** by the general procedure for glycosylation to give product **22** (80 mg, 90% yield) as a syrup after column purification (hexanes/ethyl acetate, 13:1):  $\alpha/\beta = 2:1$  as determined by integrations of H-1' and OCH<sub>3</sub> signals with the stereochemistry determined by  $J_{H1',H2'}$  coupling constant.  $\alpha$ -**22** (G. Wasonga, Y. Zeng, X. Huang, *Sci. China Chem.* **2011**, *54*, 66-73.): <sup>1</sup>H NMR (600 MHz, CDCl<sub>3</sub>)  $\delta$ : 7.37 – 7.10 (m, 35H, Ph), 4.98 (d,  $J =$

3.6 Hz, 1H, H-1'), 4.98 – 4.90 (m, 3H, Bn), 4.84 – 4.79 (m, 2H, Bn), 4.77 (d,  $J = 12.0$  Hz, 1H, Bn), 4.71

(d,  $J = 12.0$  Hz, 1H, Bn), 4.68 – 4.63 (m, 3H, Bn), 4.61 – 4.55 (m, 2H, Bn), 4.55 (d,  $J = 3.6$  Hz, 1H, H-1), 4.45 (d,  $J = 10.8$  Hz, 1H, Bn), 4.42 (d,  $J = 12.0$  Hz, 1H, Bn), 4.01 – 3.94 (m, 2H, H-3, H-3'), 3.83 – 3.75 (m, 3H, H-5, H-5', H-6a'), 3.74 – 3.70 (m, 1H, H-6a), 3.69 – 3.61 (m, 3H, H-4, H-4', H-6b'), 3.57 – 3.55 (m, 1H, H-6b), 3.54 (dd,  $J = 9.6, 3.6$  Hz, 1H, H-2'), 3.44 (dd,  $J = 9.6, 3.6$  Hz, 1H, H-2), 3.35 (s, 3H,  $\text{OCH}_3$ ). HR ESI-TOF MS ( $m/z$ ): calcd for  $\text{C}_{62}\text{H}_{70}\text{NO}_{11}$  [ $\text{M} + \text{NH}_4$ ] $^+$ , 1004.4949; found, 1004.4947.

***p*-Tolyl 4,6-*O*-benzylidene-2,3-di-*O*-benzyl-D-glucopyranosyl-(1→4)-2,3,6-tri-*O*-benzyl-1-thio-β-D-glucopyranoside (23)**

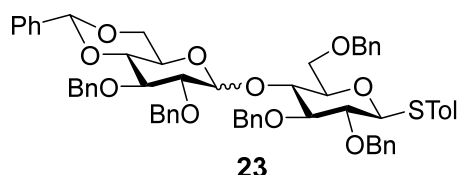

**23**

Donor **2** reacted with acceptor **5** by the general procedure for glycosylation to give product **23** (81 mg, 91% yield) as a syrup after column purification (hexanes/ethyl acetate, 15:1):  $\alpha/\beta = 4:1$  as determined by integrations of H-1' and  $\text{SPhCH}_3$  signals with

the stereochemistry determine by  $J_{\text{H}1',\text{H}2'}$  coupling constant.  $\alpha$ -**23**:  $^1\text{H}$  NMR (600 MHz,  $\text{CDCl}_3$ )  $\delta$ : 7.80 – 6.95 (m, 34H, Ph), 5.67 (d,  $J = 3.6$  Hz, 1H, H-1'), 5.53 (s, 1H,  $\text{PhCH}$ ), 4.92 – 4.78 (m, 4H, Bn), 4.74 – 4.66 (m, 3H, Bn), 4.62 – 4.50 (m, 4H, Bn, H-1), 4.16 – 4.10 (m, 2H, H-4, H-6a'), 3.99 (t,  $J = 9.6$  Hz, 1H, H-3'), 3.91 – 3.78 (m, 4H, H-3, H-5, H-6a,6b), 3.64 – 3.55 (m, 3H, H-4', H-5', H-6b'), 3.54 – 3.47 (m, 2H, H-2, H-2'), 2.32 (s, 3H,  $\text{PhCH}_3$ ).  $^{13}\text{C}$  NMR (150 MHz,  $\text{CDCl}_3$ )  $\delta$ : 101.11 ( $\text{PhCH}$ ), 97.49 (C-1'), 87.28 (C-1), 86.91, 82.30, 80.84, 78.75, 78.61, 78.37, 71.62, 68.89, 65.57, 63.30, 21.14 ( $\text{PhCH}_3$ ). HR ESI-TOF MS ( $m/z$ ): calcd for  $\text{C}_{61}\text{H}_{66}\text{NO}_{10}\text{S}$  [ $\text{M} + \text{NH}_4$ ] $^+$ , 1004.4407; found, 1004.4415.

***p*-Tolyl 4,6-*O*-benzylidene-2,3-di-*O*-benzyl-D-glucopyranosyl-(1→6)-2,3,4-tri-*O*-benzyl-1-thio-β-D-glucopyranoside (24)**

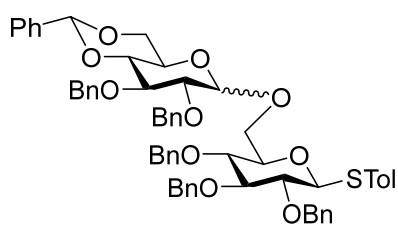

**24**

Donor **2** reacted with acceptor **6** by the general procedure for glycosylation to give product **24** (78 mg, 88% yield) as a syrup after column purification (hexanes/ethyl acetate, 15:1):  $\alpha/\beta = 5:1$  as determined by integrations of H-1' and  $\text{SPhCH}_3$  signals with the stereochemistry determine by  $J_{\text{H}1',\text{H}2'}$  coupling constant.  $\alpha$ -**24**:  $^1\text{H}$  NMR (600 MHz,  $\text{CDCl}_3$ )  $\delta$ : 7.71 – 6.89 (m, 34H, Ph), 5.58 (s, 1H,  $\text{PhCH}$ ),

5.05 (d,  $J = 3.6$  Hz, 1H, H-1'), 4.95 – 4.74 (m, 8H, Bn), 4.70 – 4.56 (m, 3H, Bn, H-1), 4.30 (dd,  $J = 10.2, 4.8$  Hz, 1H, H-6a'), 4.04 (t,  $J = 9.6$  Hz, 1H, H-3'), 3.98 – 3.91 (m, 1H, H-5'), 3.87 (dd,  $J = 12.0, 4.2$  Hz, 1H, H-6a), 3.80 (dd,  $J = 12.0, 1.8$  Hz, 1H, H-6b), 3.76 – 3.62 (m, 4H, H-3, H-4', H-5, H-6b'), 3.61 – 3.57 (m, 1H, H-2'), 3.53 – 3.44 (m, 1H, H-4), 3.26 (t,  $J = 9.6$  Hz, 1H, H-2), 2.23 (s, 3H,  $\text{PhCH}_3$ ).  $^{13}\text{C}$  NMR (150 MHz,  $\text{CDCl}_3$ )  $\delta$ : 101.36 ( $\text{PhCH}$ ), 98.26 (C-1'), 88.39 (C-1), 86.65, 82.18, 81.12, 79.56, 78.83, 78.03, 77.40, 69.14, 66.20, 62.61, 21.06 ( $\text{PhCH}_3$ ). HR ESI-TOF MS ( $m/z$ ): calcd for  $\text{C}_{61}\text{H}_{66}\text{NO}_{10}\text{S}$  [ $\text{M} + \text{NH}_4$ ] $^+$ , 1004.4407; found, 1004.4419.

**Methyl 4,6-*O*-benzylidene-2,3-di-*O*-benzyl-D-glucopyranosyl-(1→4)-2,3,6-tri-*O*-benzyl-α-D-glucopyranoside (25)**



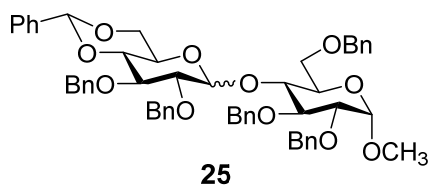

Donor **2** reacted with acceptor **7** by the general procedure for glycosylation to give product **25** (74 mg, 92% yield) as a syrup after column purification (hexanes/ethyl acetate, 15:1):  $\alpha/\beta = 3:1$  as determined by integrations of H-1' and OCH<sub>3</sub> signals with the stereochemistry determined by  $J_{H1',H2'}$  coupling constant.  $\alpha$ -**25**: <sup>1</sup>H

NMR (600 MHz, CDCl<sub>3</sub>)  $\delta$ : 7.68 – 7.06 (m, 30H, Ph), 5.78 (d,  $J = 3.6$  Hz, 1H, H-1'), 5.56 (s, 1H, PhCH), 5.07 (d,  $J = 12.0$  Hz, 1H, Bn), 4.93 (d,  $J = 11.4$  Hz, 1H, Bn), 4.85 – 4.76 (m, 2H, Bn), 4.74 – 4.67 (m, 3H, Bn), 4.65 (d,  $J = 3.6$  Hz, 1H, H-1), 4.63 – 4.55 (m, 3H, Bn), 4.24 – 4.10 (m, 3H, H-3, H-4, H-6a'), 4.02 (t,  $J = 9.6$  Hz, 1H, H-3'), 3.94 – 3.83 (m, 3H, H-5, H-5', H-6a), 3.73 – 3.67 (m, 1H, H-6b), 3.66 – 3.61 (m, 3H, H-2, H-4', H-6b'), 3.57 – 3.51 (m, 1H, H-2'), 3.41 (s, 3H, OCH<sub>3</sub>). <sup>13</sup>C NMR (150 MHz, CDCl<sub>3</sub>)  $\delta$ : 101.12 (PhCH), 97.74 (C-1), 97.19 (C-1'), 82.31, 82.13, 80.26, 78.86, 78.76, 71.61, 69.34, 68.94, 68.79, 63.29, 55.20 (OCH<sub>3</sub>). HR ESI-TOF MS ( $m/z$ ): calcd for C<sub>55</sub>H<sub>62</sub>NO<sub>11</sub> [M + NH<sub>4</sub>]<sup>+</sup>, 912.4323; found, 912.4343.

**Methyl 4,6-O-benzylidene-2,3-di-O-benzyl-D-glucopyranosyl-(1→6)-2,3,4-tri-O-benzyl- $\alpha$ -D-glucopyranoside (26)**

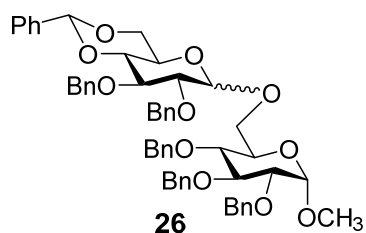

Donor **2** reacted with acceptor **8** by the general procedure for glycosylation to give product **26** (72 mg, 90% yield) as a syrup after column purification (hexanes/ethyl acetate, 15:1):  $\alpha/\beta = 6:1$  as determined by integrations of H-1' and OCH<sub>3</sub> signals with the stereochemistry determined by  $J_{H1',H2'}$  coupling constant.  $\alpha$ -**26**: <sup>1</sup>H NMR (600 MHz, CDCl<sub>3</sub>)  $\delta$ : 7.50 – 7.15 (m, 30H, Ph), 5.53 (s, 1H, PhCH), 4.97 (d,  $J = 10.8$  Hz, 1H, Bn), 4.92 (d,  $J = 3.6$  Hz, 1H, H-1'), 4.91 – 4.86 (m, 2H, Bn), 4.83 – 4.79 (m, 2H, Bn), 4.75 – 4.65 (m, 3H, Bn), 4.63 (d,  $J = 10.8$  Hz, 1H, Bn), 4.59 – 4.55 (m, 2H, H-1, Bn), 4.20 (dd,  $J = 10.2, 4.8$  Hz, 1H, H-6a'), 4.02 – 3.96 (m, 2H, H-3, H-3'), 3.91 – 3.86 (m, 1H, H-5'), 3.81 – 3.66 (m, 4H, H-5, H-6a, H-6b, H-6b'), 3.64 – 3.56 (m, 2H, H-4, H-4'), 3.53 (dd,  $J = 9.6, 3.6$  Hz, 1H, H-2), 3.43 (dd,  $J = 9.6, 3.6$  Hz, 1H, H-2'), 3.34 (s, 3H, OCH<sub>3</sub>). <sup>13</sup>C NMR (150 MHz, CDCl<sub>3</sub>)  $\delta$ : 101.27 (PhCH), 98.18 (C-1'), 97.96 (C-1), 82.15, 82.08, 80.03, 79.28, 77.90, 77.70, 70.33, 69.07, 66.32, 62.51, 55.19 (OCH<sub>3</sub>). HR ESI-TOF MS ( $m/z$ ): calcd for C<sub>55</sub>H<sub>62</sub>NO<sub>11</sub> [M + NH<sub>4</sub>]<sup>+</sup>, 912.4323; found, 912.4340.

***p*-Tolyl 2,3,4-tri-O-benzyl-6-O-*tert*-butyldimethylsilyl- $\alpha$ -D-glucopyranosyl-(1→4)-2,3,6-tri-O-benzyl-1-thio- $\beta$ -D-glucopyranoside (27)**

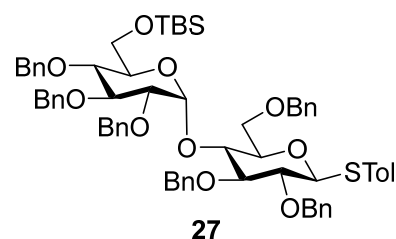

Donor **3** reacted with acceptor **5** by the general procedure for glycosylation to give product **27** (88 mg, 89% yield) as a syrup after column purification (hexanes/ethyl acetate, 14:1) with the stereochemistry determined by  $J_{H1',H2'}$  coupling constant. <sup>1</sup>H NMR (600 MHz, CDCl<sub>3</sub>)  $\delta$ : 7.54 – 7.50 (m, 2H, Ph), 7.41 – 7.00 (m, 32H, Ph), 5.56 (d,  $J = 3.6$  Hz, 1H, H-1'), 4.91 – 4.84 (m, 5H, Bn), 4.80 (d,  $J = 10.8$  Hz, 1H, Bn), 4.68 (d,  $J = 10.8$  Hz, 1H, Bn), 4.64 (d,  $J = 9.6$  Hz, 1H, H-1), 4.62 – 4.56 (m, 4H, Bn), 4.52 (d,  $J$

= 12.0 Hz, 1H, Bn), 4.10 (t,  $J$  = 9.0 Hz, 1H, H-4), 3.98 – 3.89 (m, 2H, H-3', H-6a), 3.87 – 3.78 (m, 2H, H-3, H-6b), 3.72 (dd,  $J$  = 11.4, 3.0 Hz, 1H, H-6a'), 3.70 – 3.61 (m, 3H, H-4', H-5', H-6b'), 3.61 – 3.54 (m, 2H, H-2, H-5), 3.42 (dd,  $J$  = 9.6, 3.6 Hz, 1H, H-2'), 2.33 (s, 3H, PhCH<sub>3</sub>), 0.89 (s, 9H, *t*Bu), 0.03 (s, 3H, SiCH<sub>3</sub>), 0.02 (s, 3H, SiCH<sub>3</sub>). <sup>13</sup>C NMR (150 MHz, CDCl<sub>3</sub>)  $\delta$ : 138.71, 138.69, 138.67, 138.50, 138.00, 137.96, 137.69, 132.74, 129.68, 129.61, 128.38, 128.36, 128.29, 128.26, 127.98, 127.86, 127.69, 127.65, 127.58, 127.55, 127.38, 127.35, 127.17, 126.54, 96.57 (C-1'), 87.36 (C-1), 86.84, 81.86, 80.77, 79.85, 78.71, 77.56, 77.25, 77.04, 76.83, 75.67, 75.19, 75.02, 74.19, 73.35, 73.17, 72.44, 72.28, 69.21, 61.86, 25.98, 21.16, 18.35, -5.05, -5.34. HR ESI-TOF MS ( $m/z$ ): calcd for C<sub>67</sub>H<sub>82</sub>NO<sub>10</sub>SSi [M + NH<sub>4</sub>]<sup>+</sup>, 1120.5429; found, 1120.5447.

***p*-Tolyl 2,3,4-tri-*O*-benzyl-6-*O*-*tert*-butyldimethylsilyl- $\alpha$ -D-glucopyranosyl-(1 $\rightarrow$ 6)-2,3,4-tri-*O*-benzyl-1-thio- $\beta$ -D-glucopyranoside (28)**

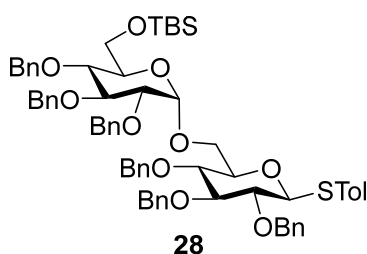

Donor **3** reacted with acceptor **6** by the general procedure for glycosylation to give product **28** (86 mg, 87% yield) as a syrup after column purification (hexanes/ethyl acetate, 14:1) with the stereochemistry determined by  $J_{H1',H2'}$  coupling constant. <sup>1</sup>H NMR (600 MHz, CDCl<sub>3</sub>)  $\delta$ : 7.48 (d,  $J$  = 8.4 Hz, 2H, Ph), 7.43 – 7.22 (m, 30H, Ph), 7.09 (d,  $J$  = 7.8 Hz, 2H, Ph), 5.05 (d,  $J$  = 3.6 Hz, 1H, H-1'), 4.97 (d,  $J$  =

10.8 Hz, 1H, Bn), 4.92 (d,  $J$  = 11.4 Hz, 1H, Bn), 4.90 – 4.86 (m, 2H, Bn), 4.85 – 4.80 (m, 3H, Bn), 4.78 (d,  $J$  = 12.0 Hz, 1H, Bn), 4.74 – 4.67 (m, 3H, Bn), 4.63 (d,  $J$  = 10.2 Hz, 1H, Bn), 4.56 (d,  $J$  = 9.6 Hz, 1H, H-1), 4.01 (t,  $J$  = 9.6 Hz, 1H, H-3'), 3.87 – 3.82 (m, 2H, H-6a, H-6a'), 3.81 – 3.77 (m, 2H, H-6b, H-6b'), 3.77 – 3.73 (m, 1H, H-5'), 3.71 (t,  $J$  = 9.6 Hz, 1H, H-4), 3.68 – 3.60 (m, 2H, H-3, H-4'), 3.54 (dd,  $J$  = 9.6, 3.6 Hz, 1H, H-2'), 3.49 – 3.45 (m, 1H, H-5), 3.26 (t,  $J$  = 9.6 Hz, 1H, H-2), 2.23 (s, 3H, PhCH<sub>3</sub>), 0.91 (s, 9H, *t*Bu), 0.08 (s, 3H, SiCH<sub>3</sub>), 0.07 (s, 3H, SiCH<sub>3</sub>). <sup>13</sup>C NMR (150 MHz, CDCl<sub>3</sub>)  $\delta$ : 138.81, 138.72, 138.56, 138.51, 138.19, 138.07, 137.91, 133.27, 129.76, 129.67, 128.44, 128.43, 128.41, 128.38, 128.37, 128.32, 128.26, 128.14, 127.90, 127.84, 127.76, 127.72, 127.68, 127.59, 127.55, 127.52, 127.48, 97.03 (C-1'), 88.17 (C-1), 86.65, 81.73, 81.08, 80.57, 78.96, 77.58, 77.54, 75.78, 75.63, 75.46, 74.99, 74.95, 72.41, 71.65, 65.74, 62.17, 25.98, 21.08, 18.35, -5.05, -5.32. HR ESI-TOF MS ( $m/z$ ): calcd for C<sub>67</sub>H<sub>82</sub>NO<sub>10</sub>SSi [M + NH<sub>4</sub>]<sup>+</sup>, 1120.5429; found, 1120.5442.

**Methyl 2,3,4-tri-*O*-benzyl-6-*O*-*tert*-butyldimethylsilyl- $\alpha$ -D-glucopyranosyl-(1 $\rightarrow$ 4)-2,3,6-tri-*O*-benzyl- $\alpha$ -D-glucopyranoside (29)**

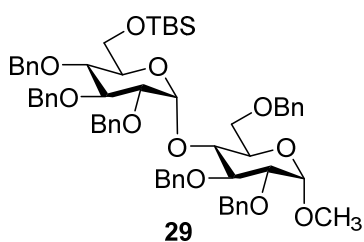

Donor **3** reacted with acceptor **7** by the general procedure for glycosylation to give product **29** (86 mg, 94% yield) as a syrup after column purification (hexanes/ethyl acetate, 14:1) with the stereochemistry determined by  $J_{H1',H2'}$  coupling constant. <sup>1</sup>H NMR (600 MHz, CDCl<sub>3</sub>)  $\delta$ : 7.52 – 6.97 (m, 30H, Ph), 5.61 (d,  $J$  = 3.6 Hz, 1H, H-1'), 5.03 (d,  $J$  = 11.4 Hz, 1H, Bn), 4.89 – 4.83 (m, 2H, Bn), 4.83 – 4.76 (m, 2H, Bn), 4.71 (d,  $J$

= 12.0 Hz, 1H, Bn), 4.65 (d,  $J$  = 10.8 Hz, 1H, Bn), 4.62 (d,  $J$  = 3.6 Hz, 1H, H-1), 4.60 – 4.50 (m, 5H, Bn), 4.08 – 4.05 (m, 2H, H-3, H-4), 3.92 (t,  $J$  = 8.4 Hz, 1H, H-3'), 3.88 – 3.83 (m, 2H, H-5', H-6a), 3.69 – 3.57 (m, 6H, H-2', H-4', H-5, H-6b, H-6a', 6b'), 3.40 (dd,  $J$  = 10.2, 3.6 Hz, 1H, H-2), 3.38 (s, 3H, OCH<sub>3</sub>), 0.86 (s, 9H, *t*Bu), -0.01 (s, 6H, SiCH<sub>3</sub>). <sup>13</sup>C NMR (150 MHz, CDCl<sub>3</sub>)  $\delta$ : 139.07, 138.78, 138.74, 138.12, 138.03, 138.00, 128.41, 128.34, 128.32, 128.29, 128.22, 128.18, 128.00, 127.90, 127.80, 127.77, 127.58, 127.55, 127.36, 127.23, 127.03, 126.68, 97.74 (C-1), 96.04 (C-1'), 82.07, 81.88, 80.14, 79.95, 77.50, 75.69, 74.97, 74.19, 73.34, 73.16, 73.11, 72.17, 71.98, 69.42, 69.05, 61.84, 55.12, 25.95, 18.31, -5.07, -5.38. HR ESI-TOF MS ( $m/z$ ): calcd for C<sub>61</sub>H<sub>78</sub>NO<sub>11</sub>Si [M + NH<sub>4</sub>]<sup>+</sup>, 1028.5344; found, 1028.5355.

**Methyl 2,3,4-tri-*O*-benzyl-6-*O*-*tert*-butyldimethylsilyl- $\alpha$ -D-glucopyranosyl-(1 $\rightarrow$ 6)-2,3,4-tri-*O*-benzyl- $\alpha$ -D-glucopyranoside (30)**

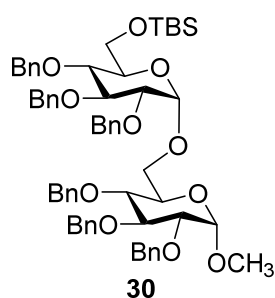

Donor **3** reacted with acceptor **8** by the general procedure for glycosylation to give product **30** (83 mg, 91% yield) as a syrup after column purification (hexanes/ethyl acetate, 14:1) with the stereochemistry determined by  $J_{H1',H2'}$  coupling constant. <sup>1</sup>H NMR (600 MHz, CDCl<sub>3</sub>)  $\delta$ : 7.69 – 7.00 (m, 30H, Ph), 5.00 (d,  $J$  = 10.2 Hz, 1H, Bn), 4.99 (d,  $J$  = 4.2 Hz, 1H, H-1'), 4.98 – 4.89 (m, 3H, Bn), 4.85 (d,  $J$  = 10.8 Hz, 1H, Bn), 4.81 (d,  $J$  = 10.2 Hz, 1H, Bn), 4.77 – 4.64 (m, 5H, Bn), 4.59 (d,  $J$  = 12.0 Hz, 1H, Bn), 4.58 (d,  $J$  = 3.6 Hz, 1H, H-1), 4.05 – 3.97 (m,

2H, H-3, H-3'), 3.85 (dd,  $J$  = 12.0, 4.8 Hz, 1H, H-6a), 3.83 – 3.72 (m, 4H, H-5', H-6b, H-6a', 6b'), 3.72 – 3.67 (m, 2H, H-4', H-5), 3.58 (t,  $J$  = 9.6 Hz, 1H, H-4), 3.52 (dd,  $J$  = 9.6, 3.6 Hz, 1H, H-2'), 3.46 (dd,  $J$  = 9.6, 3.6 Hz, 1H, H-2), 3.38 (s, 3H, OCH<sub>3</sub>), 0.90 (s, 9H, *t*Bu), 0.05 (s, 3H, SiCH<sub>3</sub>), 0.04 (s, 3H, SiCH<sub>3</sub>). <sup>13</sup>C NMR (150 MHz, CDCl<sub>3</sub>)  $\delta$ : 138.85, 138.79, 138.73, 138.58, 138.43, 138.21, 128.43, 128.39, 128.37, 128.35, 128.17, 128.03, 128.00, 127.85, 127.81, 127.69, 127.65, 127.57, 127.56, 127.53, 97.97 (C-1), 97.04 (C-1'), 82.15, 81.71, 80.40, 80.14, 77.80, 77.62, 75.74, 75.63, 75.03, 74.87, 73.42, 72.35, 71.67, 70.47, 65.74, 62.20, 55.14, 25.95, 18.32, -5.10, -5.35. HR ESI-TOF MS ( $m/z$ ): calcd for C<sub>61</sub>H<sub>78</sub>NO<sub>11</sub>Si [M + NH<sub>4</sub>]<sup>+</sup>, 1028.5344; found, 1028.5348.

***p*-Tolyl 2,3,4-tri-*O*-benzyl-6-*O*-*tert*-butyldimethylsilyl- $\alpha$ -D-glucopyranosyl-(1 $\rightarrow$ 3)-4,6-*O*-benzylidene-2-*O*-benzyl-1-thio- $\beta$ -D-glucopyranoside (31)**

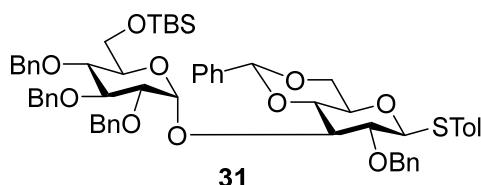

**31**

Donor **3** reacted with acceptor **9** by the general procedure for glycosylation to give product **31** (78 mg, 86% yield) as a syrup after column purification (hexanes/ethyl acetate, 14:1) with the stereochemistry determined by  $J_{H1',H2'}$  coupling constant. <sup>1</sup>H NMR (600 MHz, CDCl<sub>3</sub>)  $\delta$ : 7.54 – 6.92 (m, 29H, Ph), 5.59 (d,  $J$  = 3.6

Hz, 1H, H-1'), 5.49 (s, 1H, PhCH), 5.02 – 4.95 (m, 2H, Bn), 4.92 (d,  $J$  = 10.8 Hz, 1H, Bn), 4.84 (d,  $J$  = 10.8 Hz, 1H, Bn), 4.75 (d,  $J$  = 10.2 Hz, 1H, H-1), 4.70 (d,  $J$  = 9.6 Hz, 1H, Bn), 4.65 – 4.56 (m, 2H, Bn), 4.43 – 4.32 (m, 2H, H-6a, Bn), 4.17 (t,  $J$  = 9.6 Hz, 1H, H-3), 4.02 (t,  $J$  = 9.6 Hz, 1H, H-3'), 3.95 – 3.91 (m, 1H, H-5'), 3.88 – 3.76 (m, 2H, H-4, H-6b), 3.65 (t,  $J$  = 9.6 Hz, 1H, H-4'), 3.58 (t,  $J$  = 10.2 Hz, 1H, H-2),

3.55 – 3.51 (m, 1H, H-5), 3.46 – 3.41 (m, 3H, H-2', H-6a',6b'), 2.38 (s, 3H, PhCH<sub>3</sub>), 0.83 (s, 9H, *t*Bu), -0.06 (s, 3H, SiCH<sub>3</sub>), -0.07 (s, 3H, SiCH<sub>3</sub>). <sup>13</sup>C NMR (150 MHz, CDCl<sub>3</sub>) δ: 139.05, 138.79, 138.24, 137.85, 137.32, 136.91, 132.85, 129.88, 129.40, 129.10, 128.80, 128.45, 128.33, 128.23, 128.19, 128.13, 128.07, 127.79, 127.61, 127.54, 127.46, 127.44, 127.37, 126.38, 102.07 (PhCH), 96.03 (C-1'), 88.76 (C-1), 82.22, 81.84, 79.16, 78.92, 77.14, 76.64, 75.84, 75.76, 74.86, 71.42, 70.95, 69.83, 68.87, 61.40, 26.01, 21.18, 18.27, -5.25, -5.47. HR ESI-TOF MS (*m/z*): calcd for C<sub>60</sub>H<sub>74</sub>NO<sub>10</sub>SSi [M + NH<sub>4</sub>]<sup>+</sup>, 1028.4803; found, 1028.4832.

***p*-Tolyl 6-O-benzoyl-2,3,4-tri-O-benzyl-α-D-glucopyranosyl-(1→4)-2,3,6-tri-O-benzyl-1-thio-β-D-glucopyranoside (32)**

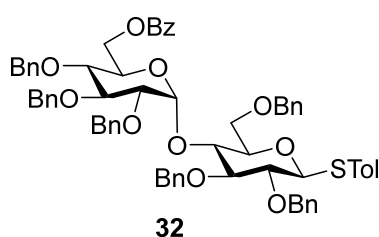

**32**

Donor **4** reacted with acceptor **5** by the general procedure for glycosylation to give product **32** (87 mg, 88% yield) as a syrup after column purification (hexanes/ethyl acetate, 12:1) with the stereochemistry determined by *J*<sub>H1',H2'</sub> coupling constant. <sup>1</sup>H NMR (600 MHz, CDCl<sub>3</sub>) δ: 8.03 – 7.99 (m, 2H, Ph), 7.60 – 7.03 (m, 37H, Ph), 5.56

(d, *J* = 3.6 Hz, 1H, H-1'), 4.92 – 4.88 (m, 4H, Bn), 4.85 (d, *J* = 10.2 Hz, 1H, Bn), 4.80 (d, *J* = 10.8 Hz, 1H, Bn), 4.64 (d, *J* = 9.6 Hz, 1H, H-1), 4.61 – 4.56 (m, 5H, Bn), 4.52 (d, *J* = 12.0 Hz, 1H, Bn), 4.41 – 4.39 (m, 2H, H-6a',6b'), 4.10 (t, *J* = 9.6 Hz, 1H, H-4), 4.06 – 4.02 (m, 1H, H-5'), 3.99 (t, *J* = 9.6 Hz, 1H, H-3'), 3.89 (dd, *J* = 11.4, 4.2 Hz, 1H, H-6a), 3.82 – 3.78 (m, 2H, H-3, H-6b), 3.62 – 3.55 (m, 2H, H-4', H-5), 3.52 (t, *J* = 9.6 Hz, 1H, H-2), 3.49 (dd, *J* = 9.6, 3.6 Hz, 1H, H-2'), 2.33 (s, 3H, PhCH<sub>3</sub>). <sup>13</sup>C NMR (150 MHz, CDCl<sub>3</sub>) δ: 166.13, 138.67, 138.37, 138.18, 137.86, 137.83, 137.77, 133.02, 132.75, 129.97, 129.70, 129.68, 129.60, 128.46, 128.43, 128.39, 128.36, 128.32, 128.30, 128.27, 128.23, 128.09, 127.97, 127.95, 127.92, 127.85, 127.72, 127.63, 127.60, 127.51, 127.11, 126.44, 96.64 (C-1'), 87.51 (C-1), 86.57, 81.90, 80.75, 79.68, 78.74, 77.73, 75.76, 75.22, 74.13, 73.36, 73.28, 73.10, 69.64, 68.97, 63.42, 21.16. HR ESI-TOF MS (*m/z*): calcd for C<sub>68</sub>H<sub>72</sub>NO<sub>11</sub>S [M + NH<sub>4</sub>]<sup>+</sup>, 1110.4826; found, 1110.4823.

***p*-Tolyl 6-O-benzoyl-2,3,4-tri-O-benzyl-α-D-glucopyranosyl-(1→6)-2,3,4-tri-O-benzyl-1-thio-β-D-glucopyranoside (33)**

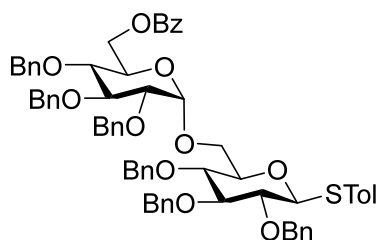

**33**

Donor **4** reacted with acceptor **6** by the general procedure for glycosylation to give product **33** (86 mg, 87% yield) as a syrup after column purification (hexanes/ethyl acetate, 12:1) with the stereochemistry determined by *J*<sub>H1',H2'</sub> coupling constant. <sup>1</sup>H NMR (600 MHz, CDCl<sub>3</sub>) δ: 8.02 (d, *J* = 7.8 Hz, 2H), 7.60 – 7.17 (m, 35H, Ph), 7.06 (d, *J* = 7.8 Hz, 2H, Ph), 5.03 (d, *J* = 3.0 Hz, 1H, H-1'), 5.02 (d, *J* = 11.4

Hz, 1H, Bn), 4.92 (d, *J* = 10.8 Hz, 1H, Bn), 4.91 – 4.86 (m, 2H, Bn), 4.86 – 4.79 (m, 4H, Bn), 4.74 (d, *J* = 12.0 Hz, 1H, Bn), 4.68 – 4.59 (m, 3H, Bn), 4.57 (d, *J* = 9.6 Hz, 1H, H-1), 4.54 (dd, *J* = 12.6, 1.8 Hz, 1H, H-6a'), 4.47 (dd, *J* = 12.0, 4.2 Hz, 1H, H-6b'), 4.08 – 4.05 (m, 1H, H-5'), 4.05 (t, *J* = 9.0 Hz, 1H, H-3'), 3.85 (dd, *J* = 11.4, 4.8 Hz, 1H, H-6a), 3.76 (dd, *J* = 12.0, 1.8 Hz, 1H, H-6b), 3.71 – 3.61 (m, 3H, H-3, H-

4, H-4'), 3.60 (dd,  $J = 9.6, 3.6$  Hz, 1H, H-2'), 3.50 – 3.46 (m, 1H, H-5), 3.24 (t,  $J = 9.0$  Hz, 1H, H-2), 2.21 (s, 3H,  $\text{PhCH}_3$ ).  $^{13}\text{C}$  NMR (150 MHz,  $\text{CDCl}_3$ )  $\delta$ : 166.20, 138.54, 138.52, 138.31, 138.09, 138.03, 137.94, 137.75, 133.02, 132.82, 130.01, 129.96, 129.76, 129.69, 128.49, 128.45, 128.44, 128.39, 128.37, 128.25, 128.16, 127.96, 127.83, 127.81, 127.75, 127.72, 127.66, 127.59, 127.57, 97.06 (C-1'), 88.48 (C-1), 86.62, 81.76, 81.13, 80.30, 78.65, 77.57, 75.89, 75.63, 75.46, 75.13, 75.00, 72.45, 68.92, 66.14, 63.42, 21.05. HR ESI-TOF MS ( $m/z$ ): calcd for  $\text{C}_{68}\text{H}_{72}\text{NO}_{11}\text{S}$  [ $\text{M} + \text{NH}_4$ ] $^+$ , 1110.4826; found, 1110.4831.

**Methyl 6-O-benzoyl-2,3,4-tri-O-benzyl- $\alpha$ -D-glucopyranosyl-(1 $\rightarrow$ 4)-2,3,6-tri-O-benzyl- $\alpha$ -D-glucopyranoside (34)**

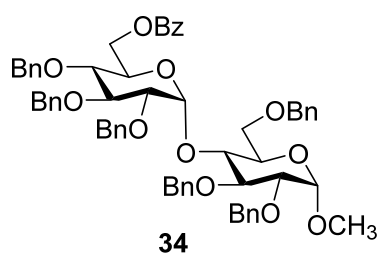

Donor **4** reacted with acceptor **7** by the general procedure for glycosylation to give product **34** (81 mg, 90% yield) as a syrup after column purification (hexanes/ethyl acetate, 12:1) with the stereochemistry determined by  $J_{\text{H}1',\text{H}2'}$  coupling constant.  $^1\text{H}$  NMR (600 MHz,  $\text{CDCl}_3$ )  $\delta$ : 8.01 (d,  $J = 7.8$  Hz, 2H, Ph), 7.58 – 7.18 (m, 33H, Ph), 5.58 (d,  $J = 3.6$  Hz, 1H, H-1'), 5.01 (d,  $J = 11.4$  Hz, 1H, Bn), 4.95 – 4.89

(m, 2H, Bn), 4.86 – 4.79 (m, 2H, Bn), 4.70 (d,  $J = 12.0$  Hz, 1H, Bn), 4.62 (d,  $J = 3.6$  Hz, 1H, H-1), 4.61 – 4.50 (m, 6H, Bn), 4.39 (dd,  $J = 12.0, 2.4$  Hz, 1H, H-6a'), 4.34 (dd,  $J = 12.0, 4.2$  Hz, 1H, H-6b'), 4.09 (t,  $J = 9.0$  Hz, 1H, H-3), 4.04 (t,  $J = 9.0$  Hz, 1H, H-4), 4.02 – 3.96 (m, 2H, H-3', H-5'), 3.90 – 3.83 (m, 2H, H-5, H-6a), 3.67 – 3.63 (m, 1H, H-6b), 3.62 – 3.55 (m, 2H, H-2, H-4'), 3.48 (dd,  $J = 9.6, 3.6$  Hz, 1H, H-2'), 3.39 (s, 3H,  $\text{OCH}_3$ ).  $^{13}\text{C}$  NMR (150 MHz,  $\text{CDCl}_3$ )  $\delta$ : 166.10, 139.05, 138.43, 137.96, 137.92, 137.85, 132.99, 130.02, 129.69, 128.45, 128.44, 128.36, 128.34, 128.30, 128.21, 128.18, 128.08, 128.03, 127.94, 127.88, 127.73, 127.69, 127.67, 127.58, 127.55, 127.02, 126.71, 97.79 (C-1), 96.33 (C-1'), 81.92, 81.82, 79.91, 79.78, 77.67, 75.80, 75.19, 74.30, 73.39, 73.36, 73.16, 73.12, 69.56, 68.87, 63.39, 55.18. HR ESI-TOF MS ( $m/z$ ): calcd for  $\text{C}_{62}\text{H}_{68}\text{NO}_{12}$  [ $\text{M} + \text{NH}_4$ ] $^+$ , 1018.4742; found, 1018.4752.

**Methyl 6-O-benzoyl-2,3,4-tri-O-benzyl- $\alpha$ -D-glucopyranosyl-(1 $\rightarrow$ 6)-2,3,4-tri-O-benzyl- $\alpha$ -D-glucopyranoside (35)**

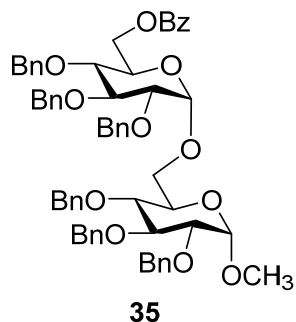

Donor **4** reacted with acceptor **8** by the general procedure for glycosylation to give product **35** (83 mg, 92% yield) as a syrup after column purification (hexanes/ethyl acetate, 12:1) with the stereochemistry determined by  $J_{\text{H}1',\text{H}2'}$  coupling constant.  $^1\text{H}$  NMR (600 MHz,  $\text{CDCl}_3$ )  $\delta$ : 8.02 – 7.91 (m, 2H, Ph), 7.59 – 7.20 (m, 33H, Ph), 4.99 (d,  $J = 4.2$  Hz, 1H, H-1'), 4.97 – 4.94 (m, 2H, Bn), 4.94 – 4.90 (m, 2H, Bn), 4.83 – 4.79 (m, 2H, Bn), 4.72 – 4.68 (m, 3H, Bn), 4.63 (d,  $J = 11.4$  Hz, 1H, Bn), 4.60 (d,  $J = 10.8$  Hz, 1H, Bn), 4.58 (d,  $J = 12.0$  Hz, 1H, Bn), 4.56 (d,  $J = 3.6$  Hz, 1H, H-1), 4.50 (dd,  $J = 12.0, 1.8$  Hz, 1H, H-6a'), 4.39 (dd,  $J = 12.0, 4.2$  Hz, 1H, H-6b'), 4.04 – 3.96 (m, 3H, H-3, H-3', H-5'), 3.84 – 3.77 (m, 2H, H-5, H-6a), 3.73 – 3.69 (m, 1H, H-6b), 3.63 – 3.58 (m, 2H, H-4, H-4'), 3.56 (dd,  $J = 9.6, 3.6$  Hz, 1H, H-2'), 3.42 (dd,  $J = 9.6, 3.6$  Hz, 1H, H-2), 3.36 (s, 3H,  $\text{OCH}_3$ ).  $^{13}\text{C}$  NMR (150 MHz,  $\text{CDCl}_3$ )  $\delta$ : 166.19, 138.76, 138.46, 138.29, 138.28, 138.11,

137.94, 133.04, 129.91, 129.63, 128.43, 128.41, 128.38, 128.34, 128.21, 128.01, 127.99, 127.93, 127.87, 127.81, 127.73, 127.71, 127.69, 127.61, 127.60, 97.89 (C-1), 96.88 (C-1'), 82.08, 81.69, 80.13, 80.09, 77.79, 77.49, 75.76, 75.74, 75.04, 73.34, 72.46, 70.33, 68.85, 65.99, 63.41, 55.19. HR ESI-TOF MS ( $m/z$ ): calcd for  $C_{62}H_{68}NO_{12}$  [ $M + NH_4$ ] $^+$ , 1018.4742; found, 1018.4750.

***p*-Tolyl 6-O-benzoyl-2,3,4-tri-O-benzyl- $\alpha$ -D-glucopyranosyl-(1 $\rightarrow$ 3)-4,6-O-benzylidene-2-O-benzyl-1-thio- $\beta$ -D-glucopyranoside (36)**

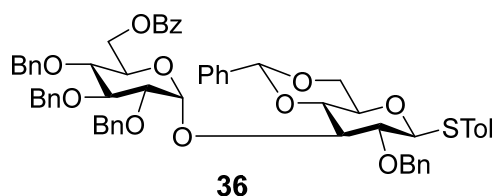

Donor **4** reacted with acceptor **9** by the general procedure for glycosylation to give product **36** (80 mg, 89% yield) as a syrup after column purification (hexanes/ethyl acetate, 12:1) with the stereochemistry determined by  $J_{H1',H2'}$  coupling constant.  $^1H$  NMR (600 MHz,  $CDCl_3$ )  $\delta$ : 7.93 (d,  $J$  = 7.2 Hz, 2H, Ph), 7.62 – 6.95 (m, 32H, Ph), 5.61 (d,  $J$  = 3.6 Hz, 1H, H-1'), 5.48 (s, 1H, PhCH), 5.09 – 5.05 (m, 2H, Bn), 4.92 (d,  $J$  = 10.8 Hz, 1H, Bn), 4.88 (d,  $J$  = 10.2 Hz, 1H, Bn), 4.74 (d,  $J$  = 9.6 Hz, 1H, H-1), 4.71 (d,  $J$  = 10.2 Hz, 1H, Bn), 4.61 (d,  $J$  = 12.0 Hz, 1H, Bn), 4.52 (d,  $J$  = 10.8 Hz, 1H, Bn), 4.38 (dd,  $J$  = 10.2, 4.2 Hz, 1H, H-6a), 4.33 (d,  $J$  = 12.0 Hz, 1H, Bn), 4.31 – 4.27 (m, 1H, H-5'), 4.21 – 4.16 (m, 2H, H-3, H-6a'), 4.06 (t,  $J$  = 9.6 Hz, 1H, H-3'), 4.02 (dd,  $J$  = 12.0, 4.2 Hz, 1H, H-6b'), 3.86 (t,  $J$  = 9.6 Hz, 1H, H-4), 3.81 (t,  $J$  = 10.2 Hz, 1H, H-6b), 3.61 (t,  $J$  = 9.6 Hz, 1H, H-2), 3.57 (t,  $J$  = 9.6 Hz, 1H, H-4'), 3.54 – 3.47 (m, 2H, H-2', H-5), 2.40 (s, 3H, PhCH<sub>3</sub>).  $^{13}C$  NMR (150 MHz,  $CDCl_3$ )  $\delta$ : 166.09, 138.55, 138.32, 138.16, 137.54, 137.09, 136.85, 132.85, 132.82, 129.95, 129.93, 129.72, 129.50, 129.22, 128.66, 128.48, 128.43, 128.34, 128.26, 128.18, 128.11, 128.06, 127.94, 127.74, 127.71, 127.58, 127.51, 126.47, 102.31 (PhCH), 95.88 (C-1'), 89.10 (C-1), 82.07, 81.74, 78.73, 77.58, 76.93, 75.92, 75.88, 75.35, 71.13, 69.88, 68.86, 68.68, 63.00, 21.21. HR ESI-TOF MS ( $m/z$ ): calcd for  $C_{61}H_{64}NO_{11}S$  [ $M + NH_4$ ] $^+$ , 1018.4200; found, 1018.4195.

**3-Azidopropyl 2,3,4-tri-O-benzyl-6-O-*tert*-butyldimethylsilyl- $\alpha$ -D-glucopyranoside (37)**

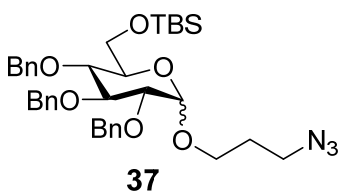

Donor **3** reacted with acceptor **10** by the general procedure for glycosylation to give product **37** (49 mg, 84% yield) as a syrup after column purification (hexanes/ethyl acetate, 12:1):  $\alpha/\beta$  = 12:1 as determined by integrations of H-1 and TBS signals with the stereochemistry determined by  $J_{H1,H2}$  coupling constant.  $\alpha$ -**37**:  $^1H$  NMR (600 MHz,  $CDCl_3$ )  $\delta$ : 7.46 – 7.17 (m, 15H, Ph), 4.96 (d,  $J$  = 10.8 Hz, 1H, Bn), 4.88 (d,  $J$  = 10.8 Hz, 1H, Bn), 4.82 (d,  $J$  = 10.8 Hz, 1H, Bn), 4.78 (d,  $J$  = 12.0 Hz, 1H, Bn), 4.72 (d,  $J$  = 3.6 Hz, 1H, H-1), 4.66 – 4.62 (m, 2H, Bn), 3.97 (t,  $J$  = 9.6 Hz, 1H, H-3), 3.80 – 3.77 (m, 1H, H-6a), 3.75 – 3.70 (m, 1H, H-5), 3.63 – 3.58 (m, 1H, H-6b), 3.54 (t,  $J$  = 9.6 Hz, 1H, H-4), 3.50 (dd,  $J$  = 9.6, 3.6 Hz, 1H, H-2), 3.47 – 3.34 (m, 4H,  $OCH_2CH_2$ ,  $CH_2N_3$ ), 1.93 – 1.81 (m, 2H,  $CH_2CH_2CH_2$ ), 0.88 (s, 9H, *t*Bu), 0.04 (s, 3H, SiCH<sub>3</sub>), 0.03 (s, 3H, SiCH<sub>3</sub>).  $^{13}C$  NMR (150 MHz,  $CDCl_3$ )  $\delta$ : 138.76, 138.38, 138.30, 128.44, 128.40, 128.33, 128.04, 127.92, 127.88, 127.84, 127.74, 127.62, 96.91 (C-1), 82.03, 80.41, 77.68, 75.80, 75.09, 73.25, 71.75, 64.47, 62.21, 48.38, 28.87, 25.91, 18.30, -5.17, -5.38. HR ESI-TOF MS ( $m/z$ ): calcd for  $C_{36}H_{53}N_4O_6Si$  [ $M + NH_4$ ] $^+$ , 665.3734; found, 665.3735.

***p*-Tolyl 2,3,4-tri-*O*-benzyl-6-*O*-*tert*-butyldimethylsilyl- $\alpha$ -D-glucopyranosyl-(1 $\rightarrow$ 6)-4-*O*-benzyl-2,3-di-*O*-isopropylidene-1-thio- $\alpha$ -D-mannopyranoside (**38**)**

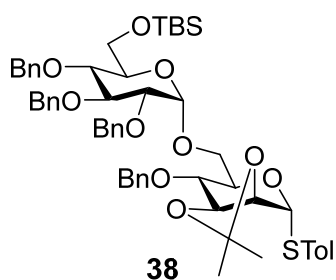

Donor **3** reacted with acceptor **11** by the general procedure for glycosylation to give product **38** (79 mg, 91% yield) as a syrup after column purification (hexanes/ethyl acetate, 14:1) with the stereochemistry determined by  $J_{H1',H2'}$  coupling constant.  $^1\text{H}$  NMR (600 MHz,  $\text{CDCl}_3$ )  $\delta$ : 7.47 – 7.09 (m, 24H, Ph), 5.71 (s, 1H, H-1), 4.96 (d,  $J$  = 11.4 Hz, 1H, Bn), 4.93 (d,  $J$  = 10.8 Hz, 1H, Bn), 4.90 (d,  $J$  = 10.8 Hz, 1H, Bn), 4.83 (d,  $J$  = 3.6 Hz, 1H, H-1'), 4.76 (d,  $J$  = 10.8 Hz, 1H, Bn), 4.72 – 4.63 (m, 4H, Bn), 4.42 – 4.35 (m, 3H, H-2, H-3, H-5), 4.01 (t,  $J$  = 9.6 Hz, 1H, H-3'), 3.90 (dd,  $J$  = 11.4, 5.4 Hz, 1H, H-6a), 3.81 (dd,  $J$  = 11.4, 4.2 Hz, 1H, H-6a'), 3.77 (dd,  $J$  = 11.4, 1.8 Hz, 1H, H-6b'), 3.76 – 3.68 (m, 2H, H-5', H-4), 3.68 (dd,  $J$  = 11.4, 1.8 Hz, 1H, H-6b), 3.59 (t,  $J$  = 9.6 Hz, 1H, H-4'), 3.50 (dd,  $J$  = 9.6, 3.6 Hz, 1H, H-2'), 2.18 (s, 3H,  $\text{PhCH}_3$ ), 1.46 (s, 3H,  $\text{CCH}_3$ ), 1.39 (s, 3H,  $\text{CCH}_3$ ), 0.90 (s, 9H, *t*Bu), 0.05 (s, 6H,  $\text{SiCH}_3$ ).  $^{13}\text{C}$  NMR (150 MHz,  $\text{CDCl}_3$ )  $\delta$ : 138.88, 138.83, 138.72, 138.24, 137.69, 132.28, 130.15, 129.90, 129.05, 128.34, 128.33, 128.24, 128.11, 127.99, 127.79, 127.72, 127.66, 127.54, 127.53, 127.44, 125.31, 109.51 ( $\text{CH}_3\text{CCH}_3$ ), 97.36 (C-1'), 84.86 (C-1), 81.84, 80.30, 78.45, 77.66, 76.63, 76.16, 75.64, 74.95, 73.03, 72.33, 71.59, 69.86, 66.67, 62.23, 27.90, 26.55, 25.98, 20.99, 18.34, -5.08, -5.38. HR ESI-TOF MS ( $m/z$ ): calcd for  $\text{C}_{56}\text{H}_{74}\text{NO}_{10}\text{SSi}$  [ $\text{M} + \text{NH}_4$ ] $^+$ , 980.4803; found, 980.4813.

***p*-Tolyl 2,3,4-tri-*O*-benzyl-6-*O*-*tert*-butyldimethylsilyl- $\alpha$ -D-glucopyranosyl-(1 $\rightarrow$ 6)-2,3,4-tri-*O*-benzoyl-1-thio- $\beta$ -D-galactopyranoside (**39**)**

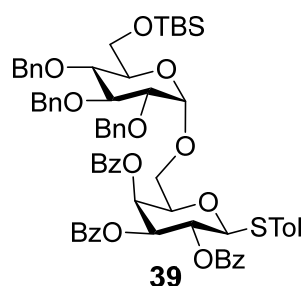

Donor **3** reacted with acceptor **12** by the general procedure for glycosylation to give product **39** (96 mg, 93% yield) as a syrup after column purification (hexanes/ethyl acetate, 15:1) with the stereochemistry determined by  $J_{H1',H2'}$  coupling constant.  $^1\text{H}$  NMR (500 MHz,  $\text{CDCl}_3$ )  $\delta$ : 7.99 (d,  $J$  = 8.0 Hz, 2H, Ph), 7.92 (d,  $J$  = 8.0 Hz, 2H, Ph), 7.76 (d,  $J$  = 8.5 Hz, 2H, Ph), 7.64 – 7.20 (m, 26H, Ph), 7.13 (d,  $J$  = 7.5 Hz, 2H, Ph), 5.93 (d,  $J$  = 3.0 Hz, 1H, H-4), 5.72 (t,  $J$  = 10.0 Hz, 1H, H-2), 5.55 (dd,  $J$  = 10.0, 3.5 Hz, 1H, H-3), 4.95 (d,  $J$  = 10.5 Hz, 1H, Bn), 4.93 – 4.88 (m, 2H, Bn, H-1), 4.81 (d,  $J$  = 11.0 Hz, 1H, Bn), 4.71 (d,  $J$  = 3.0 Hz, 1H, H-1'), 4.70 – 4.67 (m, 3H, Bn), 4.22 (t,  $J$  = 5.5 Hz, 1H, H-5), 3.98 (t,  $J$  = 9.5 Hz, 1H, H-3'), 3.92 – 3.86 (m, 2H, H-6a, H-6a'), 3.84 – 3.78 (m, 2H, H-5', H-6b'), 3.61 (t,  $J$  = 9.5 Hz, 1H, H-4'), 3.56 (dd,  $J$  = 10.0, 5.0 Hz, 1H, H-6b), 3.46 (dd,  $J$  = 10.0, 3.5 Hz, 1H, H-2'), 2.29 (s, 3H,  $\text{PhCH}_3$ ), 0.87 (s, 9H, *t*Bu), 0.01 (s, 6H,  $\text{SiCH}_3$ ).  $^{13}\text{C}$  NMR (125 MHz,  $\text{CDCl}_3$ )  $\delta$ : 165.44, 165.39, 165.19, 138.87, 138.63, 138.54, 138.16, 134.52, 133.44, 133.24, 133.13, 130.02, 129.82, 129.74, 129.67, 129.44, 129.10, 128.89, 128.49, 128.46, 128.44, 128.39, 128.38, 128.31, 128.22, 128.03, 127.96, 127.84, 127.81, 127.76, 127.73, 127.57, 127.53, 97.12 (C-1'), 86.27 (C-1), 81.90, 80.19, 77.47, 76.33, 75.81, 74.97, 73.16, 73.14, 71.86, 68.96, 68.06, 66.48, 62.07,

25.94, 21.24, 18.30, -5.15, -5.41. HR ESI-TOF MS ( $m/z$ ): calcd for  $C_{67}H_{76}NO_{13}SSi$   $[M + NH_4]^+$ , 1162.4807; found, 1162.4805.

**Methyl 2,3,4-tri-O-benzyl-6-O-*tert*-butyldimethylsilyl- $\alpha$ -D-glucopyranosyl-(1 $\rightarrow$ 6)-2,3,4-tri-O-benzoyl- $\alpha$ -D-glucopyranoside (40)**

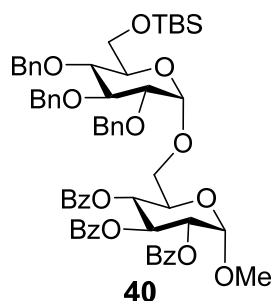

**40**

Donor **3** reacted with acceptor **13** by the general procedure for glycosylation to give product **40** (85 mg, 90% yield) as a syrup after column purification (hexanes/ethyl acetate, 10:1) with the stereochemistry determined by  $J_{H1',H2'}$  coupling constant.  $^1H$  NMR (500 MHz,  $CDCl_3$ )  $\delta$ : 8.02 – 7.20 (m, 30H, Ph), 6.16 (t,  $J$  = 9.5 Hz, 1H, H-3), 5.55 (t,  $J$  = 10.0 Hz, 1H, H-4), 5.24 (dd,  $J$  = 10.0, 3.5 Hz, 1H, H-2), 5.23 (d,  $J$  = 3.5 Hz, 1H, H-1), 4.91 (d,  $J$  = 10.5 Hz, 1H, Bn), 4.89 (d,  $J$  = 10.0 Hz, 1H, Bn), 4.79 (d,  $J$  = 11.0 Hz, 1H, Bn), 4.78 (d,  $J$  = 12.5 Hz, 1H, Bn),

4.73 (d,  $J$  = 3.5 Hz, 1H, H-1'), 4.68 – 4.63 (m, 2H, Bn), 4.36 – 4.31 (m, 1H, H-5), 4.00 (t,  $J$  = 9.5 Hz, 1H, H-3'), 3.87 (dd,  $J$  = 11.0, 7.0 Hz, 1H, H-6a), 3.78 – 3.66 (m, 3H, H-6a', 6b', H-6b), 3.61 – 3.55 (m, 2H, H-4', H-5'), 3.49 (dd,  $J$  = 10.0, 3.5 Hz, 1H, H-2'), 3.46 (s, 3H,  $OCH_3$ ), 0.89 (s, 9H,  $tBu$ ), 0.02 (s, 3H,  $SiCH_3$ ), 0.01 (s, 3H,  $SiCH_3$ ).  $^{13}C$  NMR (125 MHz,  $CDCl_3$ )  $\delta$ : 165.82, 165.81, 165.24, 138.84, 138.50, 133.30, 133.02, 129.93, 129.91, 129.67, 129.29, 129.12, 129.06, 128.39, 128.38, 128.36, 128.33, 128.30, 128.24, 128.11, 127.81, 127.68, 127.60, 127.53, 127.47, 96.95, 96.71, 81.70, 80.37, 77.53, 75.62, 74.74, 73.07, 72.26, 71.59, 70.65, 69.68, 68.61, 66.37, 61.97, 55.56, 25.94, 18.30, -5.17, -5.41. HR ESI-TOF MS ( $m/z$ ): calcd for  $C_{61}H_{72}NO_{14}Si$   $[M + NH_4]^+$ , 1070.4722; found, 1070.4743.

***p*-Methoxyphenyl 2,3,4-tri-O-benzyl-6-O-*tert*-butyldimethylsilyl- $\alpha$ -D-glucopyranosyl-(1 $\rightarrow$ 4)-2,3,6-tri-O-acetyl- $\beta$ -D-glucopyranoside (41)**

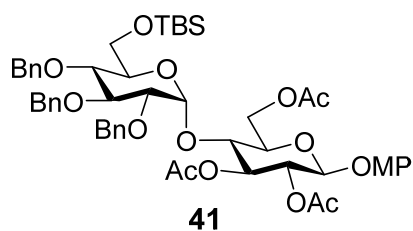

**41**

Donor **3** reacted with acceptor **14** by the general procedure for glycosylation to give product **41** (62 mg, 72% yield) as a syrup after column purification (hexanes/ethyl acetate, 10:1) with the stereochemistry determined by  $J_{H1',H2'}$  coupling constant.  $^1H$  NMR (500 MHz,  $CDCl_3$ )  $\delta$ : 7.41 – 6.80 (m, 19H, Ph), 5.36 (t,  $J$  = 9.5 Hz, 1H, H-3), 5.20 (dd,  $J$  = 9.5, 7.5 Hz, 1H, H-2), 4.93 (d,  $J$  = 7.5 Hz, 1H, H-1),

4.88 – 4.83 (m, 2H, Bn), 4.82 (d,  $J$  = 11.0 Hz, 1H, Bn), 4.76 (d,  $J$  = 3.5 Hz, 1H, H-1'), 4.75 (d,  $J$  = 11.5 Hz, 1H, Bn), 4.66 – 4.62 (m, 2H, Bn), 4.59 (dd,  $J$  = 12.0, 2.0 Hz, 1H, H-6a), 4.31 (dd,  $J$  = 12.5, 5.0 Hz, 1H, H-6b), 3.93 – 3.86 (m, 2H, H-3', H-4), 3.81 – 3.77 (m, 4H, H-6a',  $PhOCH_3$ ), 3.74 (dd,  $J$  = 11.5, 2.0 Hz, 1H, H-6b'), 3.70 – 3.64 (m, 2H, H-5, H-5'), 3.56 (t,  $J$  = 9.5 Hz, 1H, H-4'), 3.40 (dd,  $J$  = 10.0, 3.5 Hz, 1H, H-2'), 2.08 (s, 3H,  $COCH_3$ ), 2.02 (s, 3H,  $COCH_3$ ), 1.94 (s, 3H,  $COCH_3$ ), 0.89 (s, 9H,  $tBu$ ), 0.04 (s, 3H,  $SiCH_3$ ), 0.02 (s, 3H,  $SiCH_3$ ).  $^{13}C$  NMR (125 MHz,  $CDCl_3$ )  $\delta$ : 170.13, 170.04, 169.63, 155.69, 150.97, 138.63, 138.41, 138.02, 128.55, 128.43, 128.40, 128.38, 128.21, 128.11, 128.05, 127.78, 127.67, 127.66, 118.70, 114.52, 100.09 (C-1), 99.11 (C-1'), 81.17, 80.44, 77.33, 76.18, 75.77, 74.99, 73.82, 73.60, 73.41,



73.11, 71.64, 62.86, 61.89, 55.65, 25.92, 20.91, 20.78, 20.73, 18.34, -5.23, -5.43. HR ESI-TOF MS (*m/z*): calcd for C<sub>52</sub>H<sub>70</sub>NO<sub>15</sub>Si [*M* + NH<sub>4</sub>]<sup>+</sup>, 976.4515; found, 976.4533.

***p*-Tolyl 2,3,4-tri-*O*-benzyl-6-*O*-*tert*-butyldimethylsilyl- $\alpha$ -D-glucopyranosyl-(1 $\rightarrow$ 4)-2-deoxy-2-phthalimido-3,6-di-*O*-benzyl-1-thio- $\beta$ -D-glucopyranoside (42)**

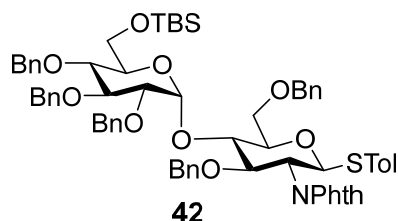

Donor **3** reacted with acceptor **15** by the general procedure for glycosylation to give product **42** (90 mg, 88% yield) as a syrup after column purification (hexanes/ethyl acetate, 12:1) with the stereochemistry determined by  $J_{H1',H2'}$  coupling constant. <sup>1</sup>H NMR (600 MHz, CDCl<sub>3</sub>)  $\delta$ : 7.75 (d,  $J$  = 6.6 Hz, 1H, Ph), 7.69 – 7.63 (m, 3H, Ph), 7.39 – 7.13 (m, 22H, Ph), 6.98 (d,  $J$  = 7.8 Hz, 2H, Ph), 6.91 – 6.76 (m,

5H, Ph), 5.45 (d,  $J$  = 10.2 Hz, 1H, H-1), 5.41 (d,  $J$  = 3.6 Hz, 1H, H-1'), 4.90 – 4.86 (m, 2H, Bn), 4.83 – 4.77 (m, 2H, Bn), 4.69 (d,  $J$  = 10.8 Hz, 1H, Bn), 4.65 – 4.56 (m, 4H, Bn), 4.50 (dd,  $J$  = 10.2, 8.4 Hz, 1H, H-3), 4.37 (d,  $J$  = 12.0 Hz, 1H, Bn), 4.32 (t,  $J$  = 10.2 Hz, 1H, H-2), 4.15 (t,  $J$  = 8.4 Hz, 1H, H-4), 4.05 (dd,  $J$  = 11.4, 3.6 Hz, 1H, H-6a), 3.98 (t,  $J$  = 9.6 Hz, 1H, H-3'), 3.87 (dd,  $J$  = 10.8, 1.2 Hz, 1H, H-6a'), 3.78 – 3.73 (m, 2H, H-5', H-6b), 3.73 – 3.69 (m, 1H, H-5), 3.68 – 3.61 (m, 2H, H-4', H-6b'), 3.47 (dd,  $J$  = 9.6, 3.6 Hz, 1H, H-2'), 2.28 (s, 3H, PhCH<sub>3</sub>), 0.89 (s, 9H, *t*Bu), 0.02 (s, 3H, SiCH<sub>3</sub>), 0.01 (s, 3H, SiCH<sub>3</sub>). <sup>13</sup>C NMR (150 MHz, CDCl<sub>3</sub>)  $\delta$ : 168.10, 167.35, 138.64, 138.59, 138.54, 138.15, 138.02, 137.89, 133.39, 129.51, 128.40, 128.35, 128.31, 128.26, 128.07, 128.05, 127.98, 127.89, 127.86, 127.66, 127.63, 127.59, 127.57, 127.46, 127.38, 126.94, 97.38 (C-1'), 83.31 (C-1), 81.76, 81.10, 80.16, 79.33, 77.54, 75.70, 75.62, 75.07, 73.93, 73.41, 73.21, 72.47, 69.10, 61.98, 54.58, 25.96, 21.14, 18.33, -5.09, -5.36. HR ESI-TOF MS (*m/z*): calcd for C<sub>68</sub>H<sub>79</sub>N<sub>2</sub>O<sub>11</sub>SSi [*M* + NH<sub>4</sub>]<sup>+</sup>, 1159.5174; found, 1159.5175.

**Isopropyl 2,3,4-tri-*O*-benzyl-6-*O*-*tert*-butyldimethylsilyl- $\alpha$ -D-glucopyranosyl-(1 $\rightarrow$ 2)-3-*O*-benzoyl-4,6-*O*-benzylidene-1-thio- $\beta$ -D-galactopyranoside (43)**

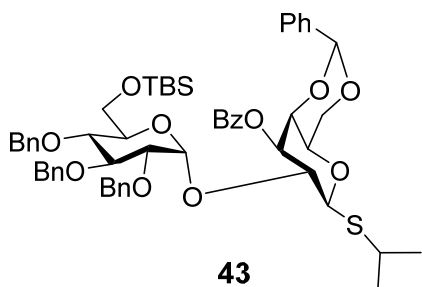

Donor **3** reacted with acceptor **16** by the general procedure for glycosylation to give product **43** (76 mg, 86% yield) as a syrup after column purification (hexanes/ethyl acetate, 12:1) with the stereochemistry determined by  $J_{H1',H2'}$  coupling constant. <sup>1</sup>H NMR (600 MHz, CDCl<sub>3</sub>)  $\delta$ : 8.02 – 7.98 (m, 2H, Ph), 7.53 – 7.17 (m, 21H, Ph), 7.00 – 6.90 (m, 2H, Ph), 5.75 (d,  $J$  = 3.6 Hz, 1H, H-1'), 5.48 (s, 1H, PhCH), 5.34 (dd,  $J$  = 9.6, 3.6 Hz, 1H, H-3), 4.92 (d,  $J$  = 12.0 Hz,

1H, Bn), 4.84 (d,  $J$  = 10.8 Hz, 1H, Bn), 4.74 (d,  $J$  = 9.0 Hz, 1H, H-1), 4.70 – 4.62 (m, 3H, Bn), 4.49 (d,  $J$  = 3.6 Hz, 1H, H-4), 4.45 (t,  $J$  = 9.6 Hz, 1H, H-2), 4.43 (d,  $J$  = 10.8 Hz, 1H, Bn), 4.35 (dd,  $J$  = 12.6, 1.2 Hz, 1H, H-6a), 4.03 (dd,  $J$  = 12.6, 1.8 Hz, 1H, H-6b), 3.81 (t,  $J$  = 9.6 Hz, 1H, H-3'), 3.73 – 3.69 (m, 1H, H-5'), 3.60 – 3.57 (m, 1H, H-5), 3.50 (dd,  $J$  = 11.4, 1.8 Hz, 1H, H-6a'), 3.46 (t,  $J$  = 9.6 Hz, 1H, H-4'), 3.44 (dd,  $J$  = 9.6, 3.6 Hz, 1H, H-2'), 3.42 – 3.33 (m, 1H, SCH), 3.31 (dd,  $J$  = 11.4, 3.6 Hz, 1H, H-6b'), 1.37 (d,  $J$  = 6.6 Hz, 3H, CHCH<sub>3</sub>), 1.31 (d,  $J$  = 6.6 Hz, 3H, CHCH<sub>3</sub>), 0.80 (s, 9H, *t*Bu), -0.06 (s, 3H, SiCH<sub>3</sub>), -0.07 (s,

3H, SiCH<sub>3</sub>). <sup>13</sup>C NMR (150 MHz, CDCl<sub>3</sub>) δ: 166.16, 138.88, 138.81, 138.27, 137.86, 133.14, 129.95, 129.84, 128.84, 128.29, 128.25, 128.08, 128.05, 128.02, 127.94, 127.56, 127.44, 127.13, 127.08, 126.23, 100.85 (PhCH), 96.08 (C-1'), 84.03 (C-1), 81.18, 80.11, 77.10, 75.62, 74.73, 74.15, 73.77, 73.13, 71.54, 69.89, 69.32, 69.15, 61.80, 34.43, 25.88, 24.48, 23.67, 18.26, -5.22, -5.41. HR ESI-TOF MS (*m/z*): calcd for C<sub>56</sub>H<sub>72</sub>NO<sub>11</sub>SSi [M + NH<sub>4</sub>]<sup>+</sup>, 994.4595; found, 994.4603.

***p*-Tolyl 2,3,4-tri-*O*-benzyl-6-*O*-*tert*-butyldimethylsilyl- $\alpha$ -D-glucopyranosyl-(1 $\rightarrow$ 4)-6-deoxy-2,3-di-*O*-isopropylidene-1-thio- $\alpha$ -D-mannopyranoside (**44**)**

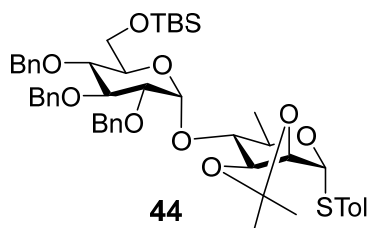

Donor **3** reacted with acceptor **17** by the general procedure for glycosylation to give product **44** (69 mg, 89% yield) as a syrup after column purification (hexanes/ethyl acetate, 12:1) with the stereochemistry determined by *J*<sub>H1',H2'</sub> coupling constant. <sup>1</sup>H NMR (600 MHz, CDCl<sub>3</sub>) δ: 7.45 – 7.26 (m, 17H, Ph), 7.13 (d, *J* = 7.8 Hz, 2H, Ph), 5.67 (d, *J* = 3.0 Hz, 1H, H-1'), 5.66 (s, 1H, H-1), 4.98 (d, *J* = 10.8 Hz, 1H, Bn), 4.88 (d, *J* =

11.4 Hz, 1H, Bn), 4.86 – 4.79 (m, 2H, Bn), 4.74 (d, *J* = 11.4 Hz, 1H, Bn), 4.67 (d, *J* = 10.8 Hz, 1H, Bn), 4.36 (dd, *J* = 7.2, 5.4 Hz, 1H, H-3), 4.32 (d, *J* = 5.4 Hz, 1H, H-2), 4.23 (dq, *J* = 9.6, 6.0 Hz, 1H, H-5), 3.93 (t, *J* = 9.6 Hz, 1H, H-3'), 3.84 (dd, *J* = 11.4, 4.2 Hz, 1H, H-6a'), 3.75 (dd, *J* = 11.4, 1.8 Hz, 1H, H-6b'), 3.70 – 3.63 (m, 2H, H-5', H-4), 3.57 (t, *J* = 9.6 Hz, 1H, H-4'), 3.54 (dd, *J* = 9.6, 3.6 Hz, 1H, H-2'), 2.33 (s, 3H, PhCH<sub>3</sub>), 1.54 (s, 3H, CCH<sub>3</sub>), 1.37 (s, 3H, CCH<sub>3</sub>), 1.21 (d, *J* = 6.0 Hz, 3H, H-6), 0.87 (s, 9H, *t*Bu), 0.03 (s, 3H, SiCH<sub>3</sub>), 0.02 (s, 3H, SiCH<sub>3</sub>). <sup>13</sup>C NMR (150 MHz, CDCl<sub>3</sub>) δ: 138.81, 138.46, 138.12, 137.84, 132.56, 129.80, 129.57, 128.41, 128.40, 128.15, 128.07, 128.04, 127.78, 127.74, 127.61, 109.45 (CH<sub>3</sub>CCH<sub>3</sub>), 95.15 (C-1'), 84.14 (C-1), 81.71, 80.13, 78.56, 77.66, 77.42, 76.80, 75.85, 75.20, 72.97, 72.12, 65.58, 62.14, 28.00, 26.59, 25.94, 21.14, 18.36, 18.35, -5.15, -5.40. HR ESI-TOF MS (*m/z*): calcd for C<sub>49</sub>H<sub>68</sub>NO<sub>9</sub>SSi [M + NH<sub>4</sub>]<sup>+</sup>, 874.4384; found, 874.4390.

**Diosgenyl 2,3,4-tri-*O*-benzyl-6-*O*-*tert*-butyldimethylsilyl- $\alpha$ -D-glucopyranoside (**45**)**

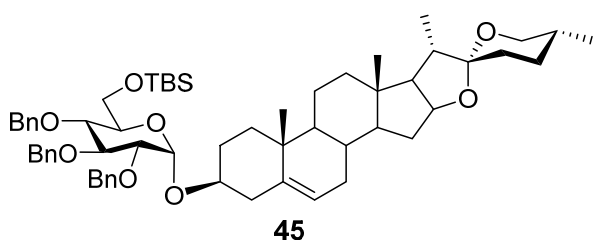

Donor **3** reacted with acceptor **18** by the general procedure for glycosylation to give product **45** (80 mg, 92% yield) as a syrup after column purification (hexanes/ethyl acetate, 25:1) with the stereochemistry determined by *J*<sub>H1,H2</sub> coupling constant. <sup>1</sup>H NMR (600 MHz, CDCl<sub>3</sub>) δ: 7.40 – 7.13 (m, 15H, Ph), 5.35 – 5.31 (m, 1H), 5.01 (d, *J* = 10.8 Hz, 1H, Bn), 4.92 (d, *J* = 3.6 Hz, 1H, H-1), 4.90 (d, *J* = 10.8 Hz, 1H, Bn), 4.83 (d, *J* = 10.8 Hz, 1H, Bn), 4.78 (d, *J* = 12.0 Hz, 1H, Bn), 4.69 – 4.63 (m, 2H, Bn), 4.42 (q, *J* = 7.2 Hz, 1H), 4.03 (t, *J* = 9.6 Hz, 1H), 3.82 – 3.72 (m, 3H), 3.54 – 3.47 (m, 4H), 3.39 (t, *J* = 11.4 Hz, 1H), 2.48 – 2.41 (m, 1H), 2.31 – 2.25 (m, 1H), 2.05 – 1.42 (m, 15H), 1.35 – 0.92 (m, 13H), 0.89 (s, 9H, *t*Bu), 0.83 – 0.78 (m, 6H), 0.05 (s, 3H, SiCH<sub>3</sub>), 0.04 (s, 3H, SiCH<sub>3</sub>). <sup>13</sup>C NMR (150 MHz, CDCl<sub>3</sub>) δ: 140.83, 138.90, 138.43, 138.33, 129.02, 128.44, 128.40, 128.22, 128.10, 128.06, 127.98, 127.82, 127.74, 127.59, 125.29, 121.44,

109.27, 93.96 (C-1), 82.12, 80.83, 80.24, 78.03, 77.26, 77.05, 76.83, 75.80, 75.64, 75.11, 73.07, 71.64, 66.84, 62.46, 62.11, 56.52, 50.04, 41.61, 40.27, 39.79, 37.05, 36.95, 32.08, 31.86, 31.44, 31.40, 30.31, 28.81, 27.25, 25.98, 21.48, 20.86, 19.46, 18.33, 17.16, 16.31, 14.56, -5.11, -5.34. HR ESI-TOF MS ( $m/z$ ): calcd for  $C_{60}H_{88}NO_8Si$  [ $M + NH_4$ ] $^+$ , 978.6279; found, 978.6285.

### 3-Azidopropyl 6-O-benzoyl-2,3,4-tri-O-benzyl- $\alpha$ -D-glucopyranoside (46)

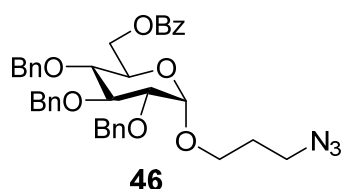

Donor **4** reacted with acceptor **10** by the general procedure for glycosylation to give product **46** (50 mg, 87% yield) as a syrup after column purification (hexanes/ethyl acetate, 9:1) with the stereochemistry determined by  $J_{H1,H2}$  coupling constant.  $^1H$  NMR (600 MHz,  $CDCl_3$ )  $\delta$ : 8.02 – 7.98 (m, 2H, Ph), 7.58 – 7.22 (m, 18H, Ph), 5.02 (d,  $J$  = 10.8 Hz, 1H, Bn),

4.92 (d,  $J$  = 10.8 Hz, 1H, Bn), 4.85 (d,  $J$  = 10.8 Hz, 1H, Bn), 4.80 (d,  $J$  = 12.0 Hz, 1H, Bn), 4.73 (d,  $J$  = 3.6 Hz, 1H, H-1), 4.65 (d,  $J$  = 12.0 Hz, 1H, Bn), 4.62 (d,  $J$  = 10.8 Hz, 1H, Bn), 4.55 (dd,  $J$  = 12.0, 2.4 Hz, 1H, H-6a), 4.47 (dd,  $J$  = 12.0, 4.8 Hz, 1H, H-6b), 4.04 (t,  $J$  = 9.6 Hz, 1H, H-3), 3.97 – 3.92 (m, 1H, H-5), 3.79 – 3.72 (m, 1H,  $OCH_2CH_2$ ), 3.61 (t,  $J$  = 9.6 Hz, 1H, H-4), 3.58 (dd,  $J$  = 9.6, 3.6 Hz, 1H, H-2), 3.49 – 3.33 (m, 3H,  $CH_2N_3$ ,  $OCH_2CH_2$ ), 1.97 – 1.83 (m, 2H,  $CH_2CH_2CH_2$ ).  $^{13}C$  NMR (150 MHz,  $CDCl_3$ )  $\delta$ : 166.19, 138.50, 138.11, 137.68, 133.09, 129.84, 129.63, 128.51, 128.49, 128.38, 128.13, 128.08, 127.98, 127.95, 127.77, 97.00 (C-1), 81.99, 80.25, 77.62, 75.91, 75.27, 73.34, 69.01, 64.79, 63.43, 48.26, 28.82. HR ESI-TOF MS ( $m/z$ ): calcd for  $C_{37}H_{43}N_4O_7$  [ $M + NH_4$ ] $^+$ , 655.3132; found, 655.3134.

### *p*-Tolyl 6-O-benzoyl-2,3,4-tri-O-benzyl- $\alpha$ -D-glucopyranosyl-(1 $\rightarrow$ 6)-4-O-benzyl-2,3-di-O-isopropylidene-1-thio- $\alpha$ -D-mannopyranoside (47)

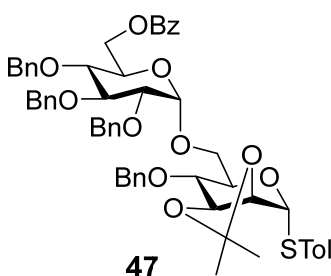

Donor **4** reacted with acceptor **11** by the general procedure for glycosylation to give product **47** (77 mg, 90% yield) as a syrup after column purification (hexanes/ethyl acetate, 10:1) with the stereochemistry determined by  $J_{H1',H2'}$  coupling constant.  $^1H$  NMR (600 MHz,  $CDCl_3$ )  $\delta$ : 8.00 (d,  $J$  = 8.4 Hz, 2H, Ph), 7.59 – 6.99 (m, 27H, Ph), 5.71 (s, 1H, H-1), 5.00 – 4.91 (m, 3H, Bn), 4.82 (d,  $J$  = 3.6 Hz, 1H, H-1'), 4.78 (d,  $J$  = 10.2 Hz, 1H,

Bn), 4.69 (s, 2H, Bn), 4.65 – 4.61 (m, 2H, Bn), 4.50 (dd,  $J$  = 12.0, 2.4 Hz, 1H, H-6a'), 4.46 (dd,  $J$  = 12.0, 4.2 Hz, 1H, H-6b'), 4.43 – 4.34 (m, 3H, H-2, H-3, H-5), 4.03 (t,  $J$  = 9.6 Hz, 1H, H-3'), 4.02 – 3.97 (m, 1H, H-5'), 3.91 (dd,  $J$  = 11.4, 5.4 Hz, 1H, H-6a), 3.72 (dd,  $J$  = 10.2, 6.6 Hz, 1H, H-4), 3.67 – 3.61 (m, 2H, H-4', H-6b), 3.55 (dd,  $J$  = 9.6, 3.6 Hz, 1H, H-2'), 2.17 (s, 3H,  $PhCH_3$ ), 1.47 (s, 3H,  $CCH_3$ ), 1.39 (s, 3H,  $CCH_3$ ).  $^{13}C$  NMR (150 MHz,  $CDCl_3$ )  $\delta$ : 166.22, 138.57, 138.46, 138.12, 138.02, 137.80, 133.58, 133.01, 132.33, 130.15, 129.95, 129.92, 129.91, 129.66, 128.45, 128.43, 128.41, 128.35, 128.31, 128.17, 128.00, 127.97, 127.86, 127.83, 127.80, 127.74, 127.71, 127.58, 109.56 ( $CH_3CCH_3$ ), 97.40 (C-1'), 84.88 (C-1), 81.82, 80.03, 78.43, 77.58, 76.59, 76.05, 75.78, 75.19, 73.02, 72.40, 69.76, 68.85, 67.01, 63.43, 27.92, 26.55, 21.00. HR ESI-TOF MS ( $m/z$ ): calcd for  $C_{57}H_{64}NO_{11}S$  [ $M + NH_4$ ] $^+$ , 970.4200; found, 970.4224.

***p*-Tolyl 6-O-benzoyl-2,3,4-tri-O-benzyl- $\alpha$ -D-glucopyranosyl-(1 $\rightarrow$ 6)-2,3,4-tri-O-benzoyl-1-thio- $\beta$ -D-galactopyranoside (48)**

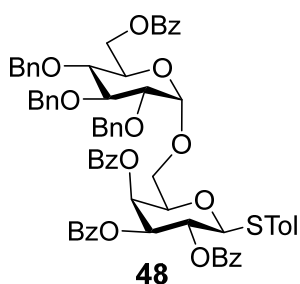

**48**

Donor **4** reacted with acceptor **12** by the general procedure for glycosylation to give product **48** (95 mg, 94% yield) as a syrup after column purification (hexanes/ethyl acetate, 10:1) with the stereochemistry determined by  $J_{H1',H2'}$  coupling constant.  $^1\text{H}$  NMR (500 MHz,  $\text{CDCl}_3$ )  $\delta$ : 8.06 (d,  $J$  = 7.5 Hz, 2H, Ph), 8.02 (d,  $J$  = 8.0 Hz, 2H, Ph), 7.89 (d,  $J$  = 8.5 Hz, 2H, Ph), 7.89 (d,  $J$  = 8.5 Hz, 2H, Ph), 7.63 – 7.11 (m, 31H, Ph), 7.13 (d,  $J$  = 7.5 Hz, 2H, Ph), 5.96 (d,  $J$  =

3.5 Hz, 1H, H-4), 5.76 (t,  $J$  = 10.0 Hz, 1H, H-2), 5.59 (dd,  $J$  = 10.0, 3.5 Hz, 1H, H-3), 5.02 (d,  $J$  = 10.5 Hz, 1H, Bn), 4.96 (d,  $J$  = 8.0 Hz, 1H, H-1), 4.94 (d,  $J$  = 9.5 Hz, 1H, Bn), 4.85 (d,  $J$  = 9.5 Hz, 1H, Bn), 4.74 (d,  $J$  = 3.5 Hz, 1H, H-1'), 4.71 (s, 2H, Bn), 4.67 (d,  $J$  = 10.5 Hz, 1H, Bn), 4.60 (dd,  $J$  = 12.0, 3.5 Hz, 1H, H-6a'), 4.56 (dd,  $J$  = 12.0, 4.0 Hz, 1H, H-6b'), 4.28 (t,  $J$  = 6.0 Hz, 1H, H-5), 4.21 – 4.17 (m, 1H, H-5'), 4.06 (t,  $J$  = 9.5 Hz, 1H, H-3'), 3.96 (dd,  $J$  = 9.5, 6.0 Hz, 1H, H-6a), 3.65 (t,  $J$  = 9.5 Hz, 1H, H-4'), 3.62 – 3.57 (m, 2H, H-2', H-6b), 2.30 (s, 3H,  $\text{PhCH}_3$ ).  $^{13}\text{C}$  NMR (125 MHz,  $\text{CDCl}_3$ )  $\delta$ : 166.24, 165.49, 165.43, 165.21, 138.63, 138.62, 137.97, 137.85, 134.52, 133.50, 133.28, 133.18, 133.08, 130.00, 129.90, 129.84, 129.75, 129.74, 129.73, 129.43, 128.95, 128.87, 128.52, 128.49, 128.42, 128.27, 128.25, 128.06, 127.98, 127.84, 127.74, 127.57, 97.13 (C-1'), 86.43 (C-1), 81.96, 80.01, 77.50, 76.27, 75.94, 75.22, 73.24, 73.14, 69.27, 68.96, 68.07, 66.95, 63.46, 21.26. HR ESI-TOF MS ( $m/z$ ): calcd for  $\text{C}_{68}\text{H}_{66}\text{NO}_{14}\text{S}$  [ $\text{M} + \text{NH}_4$ ] $^+$ , 1152.4204; found, 1152.4208.

**Methyl 6-O-benzoyl-2,3,4-tri-O-benzyl- $\alpha$ -D-glucopyranosyl-(1 $\rightarrow$ 6)-2,3,4-tri-O-benzoyl- $\alpha$ -D-glucopyranoside (49)**

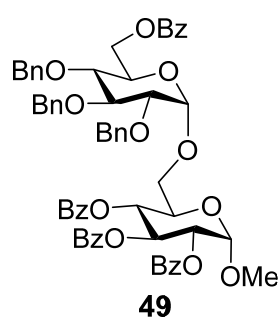

**49**

Donor **4** reacted with acceptor **13** by the general procedure for glycosylation to give product **49** (86 mg, 92% yield) as a syrup after column purification (hexanes/ethyl acetate, 8:1) with the stereochemistry determined by  $J_{H1',H2'}$  coupling constant.  $^1\text{H}$  NMR (500 MHz,  $\text{CDCl}_3$ )  $\delta$ : 8.06 – 7.21 (m, 35H, Ph), 6.17 (t,  $J$  = 10.0 Hz, 1H, H-3), 5.52 (t,  $J$  = 10.0 Hz, 1H, H-4), 5.26 (d,  $J$  = 3.5 Hz, 1H, H-1), 5.19 (dd,  $J$  = 10.0, 3.5 Hz, 1H, H-2), 5.00 (d,  $J$  = 11.0 Hz, 1H, Bn), 4.95 (d,  $J$  = 11.0 Hz, 1H, Bn), 4.85 (d,  $J$  = 11.0 Hz, 1H, Bn), 4.81 (d,  $J$  = 12.5 Hz, 1H, Bn),

4.76 (d,  $J$  = 3.5 Hz, 1H, H-1'), 4.68 (d,  $J$  = 12.5 Hz, 1H, Bn), 4.64 (d,  $J$  = 11.0 Hz, 1H, Bn), 4.51 (d,  $J$  = 12.0 Hz, 1H, H-6a'), 4.38 – 4.30 (m, 2H, H-5, H-6b'), 4.12 – 4.05 (m, 2H, H-3', H-5'), 3.90 (dd,  $J$  = 11.0, 6.5 Hz, 1H, H-6a), 3.61 – 3.55 (m, 3H, H-2', H-4', H-6b), 3.49 (s, 3H,  $\text{OCH}_3$ ).  $^{13}\text{C}$  NMR (125 MHz,  $\text{CDCl}_3$ )  $\delta$ : 166.13, 165.80, 165.74, 165.23, 138.62, 138.31, 138.06, 133.39, 133.32, 133.06, 133.02, 130.02, 129.94, 129.90, 129.69, 129.29, 129.14, 128.98, 128.49, 128.46, 128.43, 128.41, 128.27, 128.15, 127.92, 127.90, 127.85, 127.77, 127.69, 96.88, 96.82, 81.73, 80.28, 77.64, 75.77, 74.94, 73.15, 72.19, 70.62, 69.55, 68.98, 68.59, 66.58, 63.43, 55.64. HR ESI-TOF MS ( $m/z$ ): calcd for  $\text{C}_{62}\text{H}_{62}\text{NO}_{15}$  [ $\text{M} + \text{NH}_4$ ] $^+$ , 1060.4119; found, 1060.4149.

***p*-Methoxyphenyl 6-*O*-benzoyl-2,3,4-tri-*O*-benzyl- $\alpha$ -D-glucopyranosyl-(1 $\rightarrow$ 4)-2,3,6-tri-*O*-acetyl- $\beta$ -D-glucopyranoside (50)**

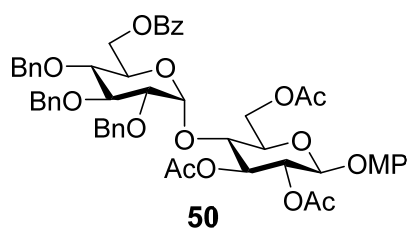

Donor **4** reacted with acceptor **14** by the general procedure for glycosylation to give product **50** (64 mg, 75% yield) as a syrup after column purification (hexanes/ethyl acetate, 8:1) with the stereochemistry determined by  $J_{H1',H2'}$  coupling constant.  $^1\text{H}$  NMR (500 MHz,  $\text{CDCl}_3$ )  $\delta$ : 8.04 – 6.79 (m, 24H, Ph), 5.38 (t,  $J$  = 9.5 Hz, 1H, H-3), 5.18 (dd,  $J$  = 9.5, 8.0 Hz, 1H, H-2), 4.93 (d,  $J$  = 7.5 Hz, 1H, H-1), 4.91

(d,  $J$  = 11.0 Hz, 1H, Bn), 4.88 (d,  $J$  = 11.0 Hz, 1H, Bn), 4.84 (d,  $J$  = 10.5 Hz, 1H, Bn), 4.82 (d,  $J$  = 3.5 Hz, 1H, H-1'), 4.76 (d,  $J$  = 12.0 Hz, 1H, Bn), 4.66 (d,  $J$  = 12.0 Hz, 1H, Bn), 4.62 – 4.57 (m, 2H, Bn, H-6a), 4.54 (dd,  $J$  = 12.0, 2.0 Hz, 1H, H-6a'), 4.42 (dd,  $J$  = 12.0, 4.5 Hz, 1H, H-6b'), 4.28 (dd,  $J$  = 12.0, 5.0 Hz, 1H, H-6b), 4.05 – 4.00 (m, 1H, H-5'), 3.97 (t,  $J$  = 9.5 Hz, 1H, H-3'), 3.89 (t,  $J$  = 9.5 Hz, 1H, H-4), 3.78 (s, 3H,  $\text{PhOCH}_3$ ), 3.72 – 3.67 (m, 1H, H-5), 3.57 (t,  $J$  = 9.5 Hz, 1H, H-4'), 3.49 (dd,  $J$  = 10.0, 3.5 Hz, 1H, H-2'), 2.09 (s, 3H,  $\text{COCH}_3$ ), 1.99 (s, 3H,  $\text{COCH}_3$ ), 1.95 (s, 3H,  $\text{COCH}_3$ ).  $^{13}\text{C}$  NMR (125 MHz,  $\text{CDCl}_3$ )  $\delta$ : 170.13, 170.05, 169.57, 166.08, 155.72, 150.92, 138.36, 137.82, 137.66, 133.10, 129.84, 129.66, 128.64, 128.51, 128.45, 128.40, 128.23, 128.19, 128.11, 128.00, 127.90, 127.82, 118.73, 114.53, 100.03 (C-1), 98.73 (C-1'), 81.23, 80.33, 77.48, 76.34, 75.86, 75.12, 73.86, 73.50, 73.37, 71.56, 70.42, 63.38, 62.56, 55.65, 20.93, 20.77, 20.72. HR ESI-TOF MS ( $m/z$ ): calcd for  $\text{C}_{53}\text{H}_{56}\text{O}_{16}\text{Na}$  [ $\text{M} + \text{Na}$ ] $^+$ , 971.3466; found, 971.3496.

***p*-Tolyl 6-*O*-benzoyl-2,3,4-tri-*O*-benzyl- $\alpha$ -D-glucopyranosyl-(1 $\rightarrow$ 4)-2-deoxy-2-phthalimido-3,6-di-*O*-benzyl-1-thio- $\beta$ -D-glucopyranoside (51)**

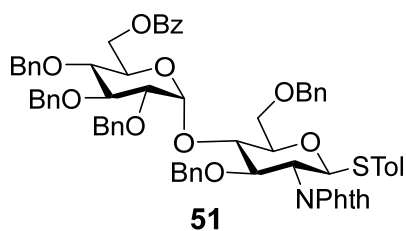

Donor **4** reacted with acceptor **15** by the general procedure for glycosylation to give product **51** (86 mg, 84% yield) as a syrup after column purification (hexanes/ethyl acetate, 11:1) with the stereochemistry determined by  $J_{H1',H2'}$  coupling constant.  $^1\text{H}$  NMR (600 MHz,  $\text{CDCl}_3$ )  $\delta$ : 8.12 – 8.05 (m, 1H, Ph), 8.02 – 7.95 (m, 2H, Ph), 7.76 – 7.12 (m, 28H, Ph), 7.02 – 6.71 (m, 7H, Ph), 5.41 (d,  $J$  = 10.2 Hz, 1H, H-1), 5.36 (d,  $J$  = 3.6 Hz, 1H, H-1'), 4.98 – 4.87 (m, 2H, Bn), 4.80 – 4.74 (m, 2H, Bn), 4.63 – 4.58 (m, 3H, Bn), 4.54 – 4.51 (m, 2H, Bn), 4.48 (dd,  $J$  = 10.2, 9.0 Hz, 1H, H-3), 4.44 (dd,  $J$  = 12.0, 2.4 Hz, 1H, H-6a'), 4.39 (dd,  $J$  = 12.0, 4.8 Hz, 1H, H-6b'), 4.33 (d,  $J$  = 12.0 Hz, 1H, Bn), 4.28 (t,  $J$  = 10.2 Hz, 1H, H-2), 4.13

(t,  $J$  = 9.6 Hz, 1H, H-4), 4.11 – 4.08 (m, 1H, H-5'), 4.02 – 3.98 (m, 2H, H-3', H-6a), 3.75 (dd,  $J$  = 11.4, 1.8 Hz, 1H, H-6b), 3.69 – 3.63 (m, 1H, H-5), 3.57 (t,  $J$  = 9.6 Hz, 1H, H-4'), 3.51 (dd,  $J$  = 9.6, 3.6 Hz, 1H, H-2'), 2.27 (s, 3H,  $\text{PhCH}_3$ ).  $^{13}\text{C}$  NMR (150 MHz,  $\text{CDCl}_3$ )  $\delta$ : 166.11, 138.27, 138.23, 138.16, 138.05, 137.82, 137.73, 133.64, 133.38, 133.03, 130.15, 129.90, 129.63, 129.51, 128.86, 128.47, 128.44, 128.39, 128.36, 128.23, 128.04, 127.88, 127.86, 127.72, 127.70, 127.66, 127.46, 127.43, 126.90, 126.26, 97.30 (C-1'), 83.45 (C-1), 81.71, 80.76, 79.99, 79.30, 77.70, 76.44, 75.75, 75.20, 73.94, 73.26, 73.25, 69.79, 68.76,

63.49, 54.53, 21.13. HR ESI-TOF MS ( $m/z$ ): calcd for  $C_{69}H_{69}N_2O_{12}S$  [ $M + NH_4$ ] $^+$ , 1149.4571; found, 1149.4579.

**Isopropyl 6-O-benzoyl-2,3,4-tri-O-benzyl- $\alpha$ -D-glucopyranosyl-(1 $\rightarrow$ 2)-3-O-benzoyl-4,6-O-benzylidene-1-thio- $\beta$ -D-galactopyranoside (52)**

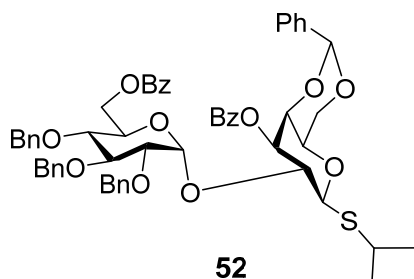

Donor **4** reacted with acceptor **16** by the general procedure for glycosylation to give product **52** (74 mg, 85% yield) as a syrup after column purification (hexanes/ethyl acetate, 10:1) with the stereochemistry determined by  $J_{H1',H2'}$  coupling constant.  $^1H$  NMR (600 MHz,  $CDCl_3$ )  $\delta$ : 7.99 (d,  $J$  = 7.8 Hz, 2H, Ph), 7.91 (d,  $J$  = 7.8 Hz, 2H, Ph), 7.51 – 7.44 (m, 4H, Ph), 7.43 – 7.39 (m, 2H, Ph), 7.36 – 7.14 (m, 18H, Ph), 6.91 – 6.87 (m, 2H, Ph), 5.80 (d,  $J$  = 3.6 Hz, 1H, H-1'), 5.50

(s, 1H, PhCH), 5.40 (dd,  $J$  = 9.6, 3.6 Hz, 1H, H-3), 4.95 (d,  $J$  = 11.4 Hz, 1H, Bn), 4.90 (d,  $J$  = 10.8 Hz, 1H, Bn), 4.76 (d,  $J$  = 9.0 Hz, 1H, H-1), 4.71 – 4.65 (m, 3H, Bn), 4.49 (d,  $J$  = 4.2 Hz, 1H, H-4), 4.46 (t,  $J$  = 9.6 Hz, 1H, H-2), 4.37 – 4.30 (m, 2H, H-6a, Bn), 4.23 (d,  $J$  = 12.0 Hz, 1H, H-6a'), 4.06 – 4.02 (m, 1H, H-6b), 4.01 – 3.97 (m, 1H, H-5'), 3.90 – 3.85 (m, 2H, H-3', H-6b'), 3.61 – 3.58 (m, 1H, H-5), 3.52 (dd,  $J$  = 9.6, 3.6 Hz, 1H, H-2'), 3.48 (t,  $J$  = 9.6 Hz, 1H, H-4'), 3.39 – 3.33 (m, 1H, SCH), 1.34 (d,  $J$  = 6.6 Hz, 3H, CHCH $_3$ ), 1.29 (d,  $J$  = 6.6 Hz, 3H, CHCH $_3$ ).  $^{13}C$  NMR (150 MHz,  $CDCl_3$ )  $\delta$ : 166.17, 166.12, 138.50, 138.06, 137.99, 137.70, 133.38, 132.91, 129.78, 129.73, 129.69, 129.51, 128.91, 128.41, 128.35, 128.30, 128.17, 128.10, 128.09, 127.92, 127.67, 127.62, 127.42, 127.38, 126.17, 100.95 (PhCH), 95.99 (C-1'), 83.89 (C-1), 81.14, 79.88, 77.21, 75.78, 74.55, 74.48, 73.87, 73.13, 70.42, 69.37, 69.13, 68.88, 63.26, 34.57, 24.33, 23.68. HR ESI-TOF MS ( $m/z$ ): calcd for  $C_{57}H_{62}NO_{12}S$  [ $M + NH_4$ ] $^+$ , 984.3993; found, 984.4005.

***p*-Tolyl 6-O-benzoyl-2,3,4-tri-O-benzyl- $\alpha$ -D-glucopyranosyl-(1 $\rightarrow$ 4)-6-deoxy-2,3-di-O-isopropylidene-1-thio- $\alpha$ -D-mannopyranoside (53)**

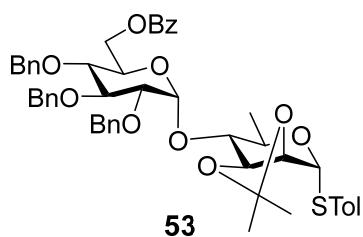

Donor **4** reacted with acceptor **17** by the general procedure for glycosylation to give product **53** (66 mg, 87% yield) as a syrup after column purification (hexanes/ethyl acetate, 14:1) with the stereochemistry determined by  $J_{H1',H2'}$  coupling constant.  $^1H$  NMR (600 MHz,  $CDCl_3$ )  $\delta$ : 8.00 (d,  $J$  = 7.8 Hz, 2H, Ph), 7.57 – 7.04 (m, 22H, Ph), 5.67 (d,  $J$  = 4.2 Hz, 1H, H-1'), 5.66 (s, 1H, H-1), 5.04 (d,  $J$  = 10.2 Hz, 1H, Bn), 4.92 (d,  $J$  = 10.8 Hz, 1H, Bn), 4.88 – 4.82 (m, 2H, Bn), 4.75 (d,  $J$  = 11.4 Hz, 1H, Bn), 4.61 (d,  $J$  = 10.8 Hz, 1H, Bn), 4.51 (dd,  $J$  = 12.0, 2.4 Hz, 1H, H-6a'), 4.46 (dd,  $J$  = 12.0, 4.8 Hz, 1H, H-6b'), 4.35 (t,  $J$  = 6.0 Hz, 1H, H-3), 4.31 (d,  $J$  = 5.4 Hz, 1H, H-2), 4.28 – 4.21 (m, 1H, H-5), 4.08 – 4.03 (m, 1H, H-5'), 4.01 (t,  $J$  = 9.6 Hz, 1H, H-3'), 3.70 – 3.57 (m, 3H, H-2', H-4, H-4'), 2.34 (s, 3H, PhCH $_3$ ), 1.44 (s, 3H, CCH $_3$ ), 1.34 (s, 3H, CCH $_3$ ), 1.26

(d,  $J$  = 6.0 Hz, 3H, H-6).  $^{13}C$  NMR (150 MHz,  $CDCl_3$ )  $\delta$ : 166.25, 138.53, 137.95, 137.94, 137.68, 133.05, 132.64, 129.85, 129.79, 129.71, 129.65, 129.46, 128.49, 128.38, 128.19, 128.08, 127.99, 127.90, 127.77,

109.53 (CH<sub>3</sub>CCH<sub>3</sub>), 95.29 (C-1'), 84.18 (C-1), 81.75, 79.90, 78.35, 78.33, 77.72, 76.69, 75.94, 75.33, 73.05, 69.36, 65.39, 63.73, 27.93, 26.48, 21.17, 18.37. HR ESI-TOF MS (*m/z*): calcd for C<sub>50</sub>H<sub>58</sub>NO<sub>10</sub>S [M + NH<sub>4</sub>]<sup>+</sup>, 864.3781; found, 864.3783.

### Diosgenyl 6-O-benzoyl-2,3,4-tri-O-benzyl- $\alpha$ -D-glucopyranoside (**54**)

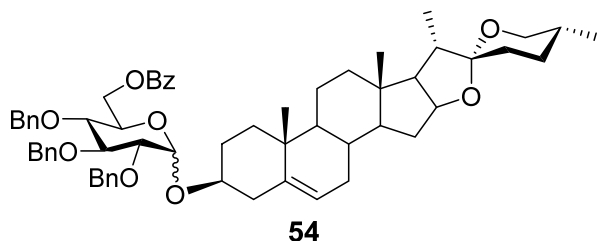

Donor **4** reacted with acceptor **18** by the general procedure for glycosylation to give product **54** (80 mg, 93% yield) as a syrup after column purification (hexanes/ethyl acetate, 15:1):  $\alpha/\beta$  = 10:1 as determined by integrations of H-1 and CH<sub>3</sub> signals with the stereochemistry determine by  $J_{H1,H2}$  coupling constant.

$\alpha$ -**54**: <sup>1</sup>H NMR (600 MHz, CDCl<sub>3</sub>)  $\delta$ : 8.00 – 7.97 (m, 2H, Ph), 7.56 – 7.52 (m, 1H, Ph), 7.42 – 7.19 (m, 17H, Ph), 5.23 (d,  $J$  = 5.4 Hz, 1H), 5.04 (d,  $J$  = 10.8 Hz, 1H, Bn), 4.92 (d,  $J$  = 11.4 Hz, 1H, Bn), 4.91 (d,  $J$  = 3.6 Hz, 1H, H-1), 4.84 (d,  $J$  = 10.8 Hz, 1H, Bn), 4.78 (d,  $J$  = 12.0 Hz, 1H, Bn), 4.67 (d,  $J$  = 12.0 Hz, 1H, Bn), 4.61 (d,  $J$  = 10.8 Hz, 1H, Bn), 4.56 – 4.52 (m, 1H, H-6a), 4.48 – 4.40 (m, 2H, H-6b, H-4), 4.12 – 4.05 (m, 2H, H-3, H-5), 3.58 – 3.53 (m, 2H, H-2), 3.50 – 3.44 (m, 2H), 3.39 (t,  $J$  = 10.8 Hz, 1H), 2.50 – 2.40 (m, 1H), 2.33 – 2.28 (m, 1H), 2.03 – 1.40 (m, 15H), 1.35 – 0.75 (m, 19H). <sup>13</sup>C NMR (150 MHz, CDCl<sub>3</sub>)  $\delta$ : 166.26, 140.59, 138.63, 138.10, 137.72, 132.97, 129.85, 129.71, 128.52, 128.47, 128.43, 128.41, 128.37, 128.32, 128.20, 128.15, 128.11, 128.07, 128.00, 127.97, 127.94, 127.72, 121.53, 109.27, 94.38 (C-1), 82.07, 80.80, 80.05, 77.98, 76.58, 75.89, 75.28, 73.13, 68.85, 66.84, 63.77, 62.09, 56.52, 49.99, 41.59, 40.26, 39.86, 39.76, 37.00, 36.89, 32.10, 31.85, 31.41, 31.38, 30.30, 28.80, 27.39, 20.82, 19.38, 19.35, 17.15, 16.29, 14.55. HR ESI-TOF MS (*m/z*): calcd for C<sub>61</sub>H<sub>78</sub>NO<sub>9</sub> [M + NH<sub>4</sub>]<sup>+</sup>, 968.5677; found, 968.5682.

### 3-Azidopropyl 6-O-benzoyl-2,3-di-O-benzyl- $\alpha$ -D-glucopyranosyl-(1→4)-6-O-benzoyl-2,3-di-O-benzyl- $\alpha$ -D-glucopyranoside (**58**)

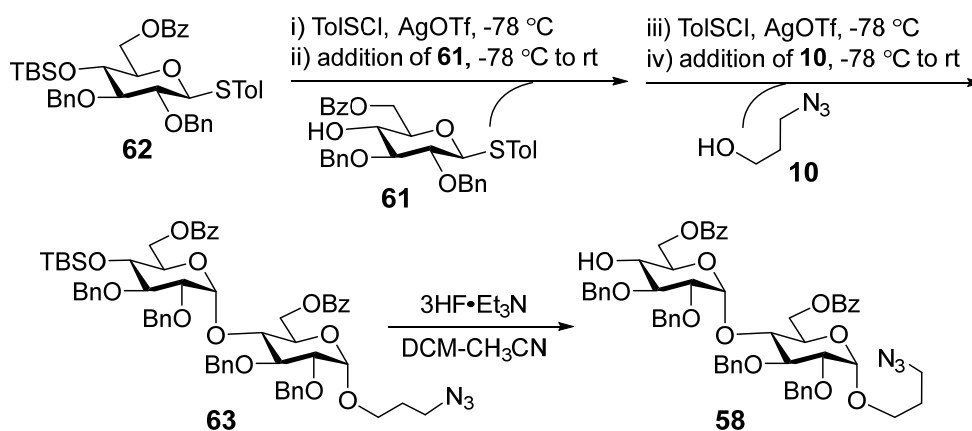

After the mixture of donor **62** (350 mg, 0.51 mmol) and freshly activated MS 4Å in anhydrous diethyl ether (20 mL) was stirred at room temperature for 1.0 h and then cooled to -78 °C, a solution of AgOTf (132 mg, 0.51 mmol) in diethyl ether (1.5 mL) was added. The mixture was stirred for 15 min, and *p*-

TolSCI (74  $\mu$ L, 0.51 mmol) was added through a microsyringe without touching the flask. Fifteen minutes later, a solution of acceptor **61** (262 mg, 0.46 mmol) in anhydrous diethyl ether (2.0 mL), which was precooled to  $-78^{\circ}\text{C}$ , was added. The reaction was warmed up to room temperature slowly in 1.5 h and stirred for another 15 min, before it was cooled to  $-78^{\circ}\text{C}$  again. Next, the AgOTf (118 mg, 0.46 mmol) in anhydrous diethyl ether (1.0 mL), *p*-TolSCI (66  $\mu$ L, 0.46 mmol), and precooled **10** (46 mg, 0.46 mmol) were added sequentially. The reaction mixture was warmed up to room temperature slowly and stirred for another 15 min before it was quenched with  $\text{Et}_3\text{N}$ , diluted with  $\text{CH}_2\text{Cl}_2$ , and filtered. The filtrate was concentrated under vacuum, and the residue purified by flash silica gel column chromatography (hexanes/ethyl acetate, 8:1) to provide **63**. To the solution of **63** in acetonitrile/ $\text{CH}_2\text{Cl}_2$  (V/V, 1:3, 4 mL) was added triethylamine trihydrofluoride (1 mL). The reaction solution was stirred at room temperature for overnight. The mixture was diluted with ethyl acetate (20 mL) and washed with saturated aq.  $\text{NaHCO}_3$  solution and brine, the organic layer was dried with  $\text{Na}_2\text{SO}_4$  and concentrated. Purification of the residue on a silica gel column (hexanes/ethyl acetate, 7:1) provided product **58** (279 mg, 61% for three steps) as a syrup.  $^1\text{H}$  NMR (600 MHz,  $\text{CDCl}_3$ )  $\delta$ : 8.08 – 7.96 (m, 4H, Ph), 7.60 – 7.51 (m, 2H, Ph), 7.47 – 7.37 (m, 4H, Ph), 7.31 – 7.15 (m, 20H, Ph), 5.71 (d,  $J$  = 3.6 Hz, 1H, H-1'), 5.02 (d,  $J$  = 11.4 Hz, 1H, Bn), 4.89 (d,  $J$  = 10.8 Hz, 1H, Bn), 4.82 – 4.75 (m, 2H, Bn), 4.72 (d,  $J$  = 3.6 Hz, 1H, H-1), 4.71 (dd,  $J$  = 12.0, 2.4 Hz, 1H, H-6a), 4.65 (d,  $J$  = 12.0 Hz, 1H, Bn), 4.61 (d,  $J$  = 12.0 Hz, 1H, Bn), 4.58 (dd,  $J$  = 12.0, 3.6 Hz, 1H, H-6a'), 4.55 – 4.52 (m, 3H, Bn, H-6b), 4.28 (dd,  $J$  = 12.0, 2.4 Hz, 1H, H-6b'), 4.10 (t,  $J$  = 9.0 Hz, 1H, H-3'), 4.09 – 4.05 (m, 1H, H-5), 4.00 (dd,  $J$  = 9.6, 8.4 Hz, 1H, H-4), 3.90 – 3.87 (m, 1H, H-5'), 3.86 (t,  $J$  = 9.6 Hz, 1H, H-3), 3.77 – 3.71 (m, 1H,  $\text{OCH}_2\text{CH}_2$ ), 3.58 (dd,  $J$  = 9.0, 3.6 Hz, 1H, H-2), 3.51 (t,  $J$  = 9.6 Hz, 1H, H-4'), 3.47 – 3.38 (m, 4H, H-2',  $\text{OCH}_2\text{CH}_2$ ,  $\text{N}_3\text{CH}_2$ ), 2.77 (s, 1H, OH), 1.94 – 1.87 (m, 2H,  $\text{CH}_2\text{CH}_2\text{CH}_2$ ).  $^{13}\text{C}$  NMR (150 MHz,  $\text{CDCl}_3$ )  $\delta$ : 166.87, 166.15, 138.83, 138.40, 137.83, 137.76, 133.25, 133.15, 129.82, 129.71, 129.67, 129.64, 128.51, 128.48, 128.34, 128.32, 128.31, 128.25, 128.02, 128.00, 127.97, 127.83, 127.65, 127.58, 127.13, 126.57, 97.12 (C-1'), 96.58 (C-1), 81.46, 80.86, 80.41, 78.91, 75.60, 74.17, 73.60, 73.37, 73.22, 71.12, 70.20, 68.39, 64.89, 63.79, 63.42, 48.25, 28.78. HR ESI-TOF MS ( $m/z$ ): calcd for  $\text{C}_{57}\text{H}_{59}\text{N}_3\text{O}_{13}\text{Na}$  [ $\text{M} + \text{Na}$ ] $^+$ , 1016.3946; found, 1016.3933.

**3-Azidopropyl 4,6-di-O-[6-O-benzoyl-2,3,4-tri-O-benzyl- $\alpha$ -D-glucopyranosyl-(1 $\rightarrow$ 4)-6-O-benzoyl-2,3-di-O-benzyl- $\alpha$ -D-glucopyranosyl]-2,3-di-O-benzyl- $\alpha$ -D-glucopyranosyl-(1 $\rightarrow$ 4)-6-O-benzoyl-2,3-di-O-benzyl- $\alpha$ -D-glucopyranosyl-(1 $\rightarrow$ 4)-6-O-benzoyl-2,3-di-O-benzyl- $\alpha$ -D-glucopyranoside (56)**



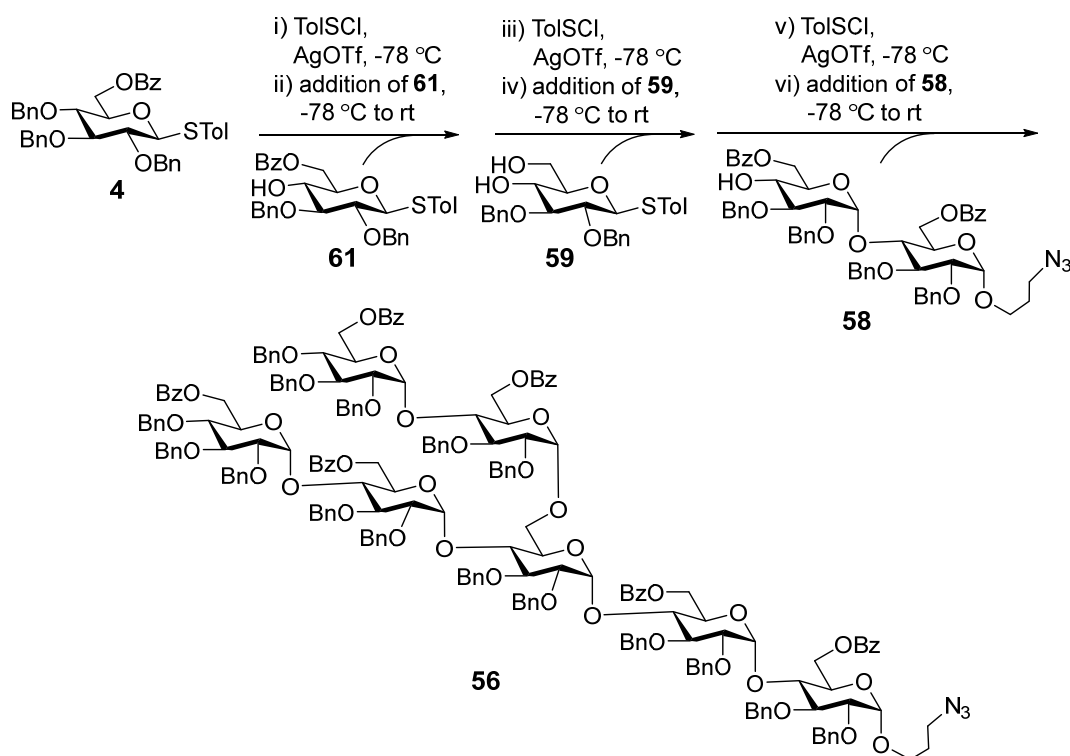

After the mixture of donor **4** (128 mg, 194  $\mu\text{mol}$ ) and freshly activated MS 4Å in anhydrous diethyl ether (10 mL) was stirred at room temperature for 1.0 h and then cooled to -78 °C, a solution of AgOTf (50 mg, 194  $\mu\text{mol}$ ) in diethyl ether (0.5 mL) was added. The mixture was stirred for 15 min, and *p*-TolSCI (28  $\mu\text{L}$ , 194  $\mu\text{mol}$ ) was added through a microsyringe without touching the flask. Fifteen minutes later, a solution of precooled acceptor **61** (100 mg, 176  $\mu\text{mol}$ ) in anhydrous diethyl ether (1.5 mL) was added. The reaction was warmed up to room temperature slowly in 1.5 h and stirred for another 15 min, before it was cooled to -78 °C. Next, the AgOTf (45 mg, 176  $\mu\text{mol}$ ) in anhydrous diethyl ether (0.5 mL), *p*-TolSCI (25  $\mu\text{L}$ , 176  $\mu\text{mol}$ ), and precooled **59** (37 mg, 80  $\mu\text{mol}$ ) were added sequentially. The reaction mixture was warmed up to room temperature slowly in 1.5 h and stirred for another 15 min before it was cooled to -78 °C again. Then, the AgOTf (21 mg, 80  $\mu\text{mol}$ ) in anhydrous diethyl ether (0.2 mL), *p*-TolSCI (12  $\mu\text{L}$ , 80  $\mu\text{mol}$ ), and precooled **58** (79 mg, 80  $\mu\text{mol}$ ) were added in the same sequence. The reaction was warmed up to room temperature slowly and stirred for another 15 min before it was quenched with Et<sub>3</sub>N, diluted with CH<sub>2</sub>Cl<sub>2</sub>, and filtered. The filtrate was concentrated under vacuum, and the residue purified by flash silica gel column chromatography (hexanes/ethyl acetate, 8:1) to provide **56** (143 mg, 54% yield for one-pot three step reactions) as a white syrup. <sup>1</sup>H NMR (600 MHz, CDCl<sub>3</sub>)  $\delta$ : 8.16 – 8.09 (m, 3H, Ph), 8.08 – 7.99 (m, 4H, Ph), 7.95 – 7.89 (m, 4H, Ph), 7.58 – 6.85 (m, 99H, Ph), 5.86 (d, *J* = 3.6 Hz, 1H, H-1<sup>A</sup>), 5.68 (d, *J* = 3.6 Hz, 1H, H-1<sup>B</sup>), 5.62 (d, *J* = 3.6 Hz, 1H, H-1<sup>C</sup>), 5.59 (d, *J* = 3.6 Hz, 1H, H-1<sup>D</sup>), 5.36 (d, *J* = 3.0 Hz, 1H, H-1<sup>E</sup>), 5.29 (d, *J* = 3.6 Hz, 1H, H-1<sup>F</sup>), 5.17 (d, *J* = 10.8 Hz, 1H, Bn), 5.05 – 4.97 (m, 2H), 4.90 – 4.79 (m, 7H), 4.78 – 4.74 (m, 3H), 4.72 (d, *J* = 3.6 Hz, 1H, H-1<sup>G</sup>), 4.70 – 4.65 (m, 4H), 4.65 – 4.58 (m, 4H), 4.58 – 4.43 (m, 13H), 4.41 – 4.29 (m, 5H), 4.26 – 4.19 (m, 4H), 4.19 – 4.03 (m, 10H), 4.02 – 3.88 (m, 8H), 3.80 (d, *J* = 10.2 Hz, 1H), 3.75 – 3.69 (m, 1H), 3.65 (t, *J* = 9.6 Hz, 1H), 3.62 – 3.57 (m, 3H), 3.57 – 3.35 (m, 10H), 3.16 (dd, *J* = 9.6, 3.6 Hz, 1H), 1.93 – 1.81 (m, 2H). <sup>13</sup>C NMR (150 MHz, CDCl<sub>3</sub>)  $\delta$ : 166.12, 166.04, 165.96, 165.86, 165.73, 139.17, 138.89, 138.73, 138.63, 138.40, 138.15, 137.94, 137.90,

137.89, 137.82, 137.71, 137.68, 137.57, 133.45, 133.30, 133.18, 133.04, 132.88, 132.84, 130.04, 129.97, 129.95, 129.91, 129.84, 129.81, 129.76, 129.73, 129.70, 129.66, 129.64, 129.62, 129.58, 128.66, 128.54, 128.52, 128.49, 128.45, 128.40, 128.38, 128.34, 128.32, 128.31, 128.27, 128.25, 128.22, 128.18, 128.15, 128.08, 128.04, 128.00, 127.98, 127.95, 127.94, 127.92, 127.85, 127.75, 127.74, 127.71, 127.67, 127.53, 127.50, 127.48, 127.42, 127.37, 127.25, 127.23, 127.20, 127.16, 127.03, 126.85, 126.81, 126.72, 126.68, 126.50, 126.26, 96.96 (C-1<sup>D</sup>), 96.93 (C-1<sup>A</sup>), 96.90 (C-1<sup>B</sup>), 96.71 (C-1<sup>E</sup>), 96.63 (C-1<sup>G</sup>), 96.54 (C-1<sup>C</sup>), 96.25 (C-1<sup>F</sup>), 81.88, 81.62, 81.34, 81.21, 80.85, 80.31, 80.19, 79.91, 79.64, 79.35, 79.05, 78.88, 78.26, 77.63, 77.57, 75.75, 75.63, 75.33, 74.96, 74.90, 74.77, 74.40, 73.85, 73.72, 73.57, 73.34, 73.26, 72.49, 72.30, 72.24, 71.95, 69.97, 69.80, 69.44, 69.38, 68.62, 67.87, 64.89, 63.98, 63.86, 63.61, 63.31, 63.03, 62.97, 48.28, 28.81. HR ESI-TOF MS (m/z): calcd for C<sub>199</sub>H<sub>201</sub>N<sub>4</sub>O<sub>42</sub> [M + NH<sub>4</sub>]<sup>+</sup>, 3318.3715; found, 3318.3709.

**3-Aminopropyl 4,6-di-O-[α-D-glucopyranosyl-(1→4)-α-D-glucopyranosyl]-α-D-glucopyranosyl-(1→4)-α-D-glucopyranoside (55)**

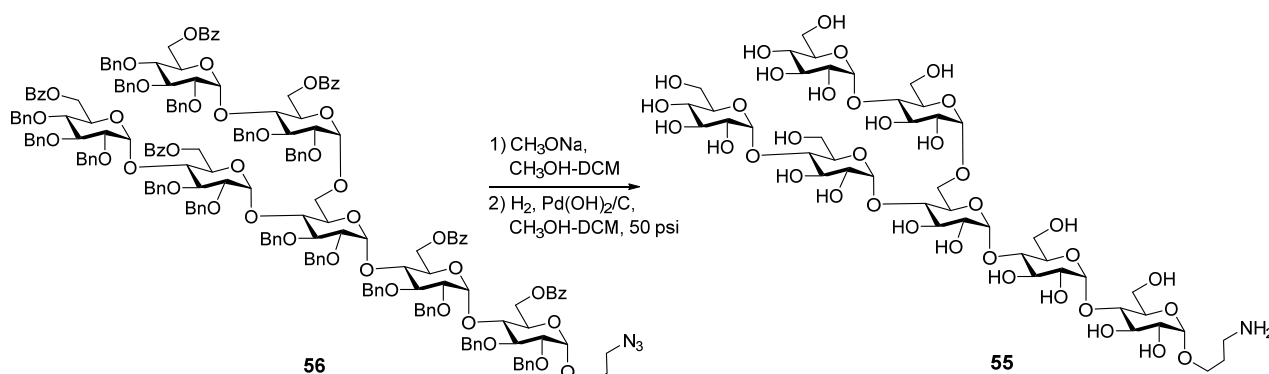

To a solution of **56** (50 mg, 15 μmol) in CH<sub>3</sub>OH/CH<sub>2</sub>Cl<sub>2</sub> (V/V, 3:1, 10 mL) was added sodium methoxide (1 mL, 1.0 M in methanol). The reaction mixture was stirred at room temperature for 3 hours and then neutralized by Amberlite® IR120 hydrogen form. The resin was removed by filtration and the filtrate was concentrated under vacuum. The residue was dissolved in a mixed solvent of CH<sub>3</sub>OH/CH<sub>2</sub>Cl<sub>2</sub> (V/V, 9:1, 10 mL), and a catalytic amount of 20 wt% Pd(OH)<sub>2</sub>/C was added. The reaction mixture was stirred for 36 h under H<sub>2</sub> atmosphere in 50 psi. The progress of the reaction was monitored by MALDI-TOF mass spectrometer. Upon completion, the reaction mixture was filtrated and the filtrate was purified on a Sephadex G-25 gel column with H<sub>2</sub>O as the eluent to produce the synthetic target **55** (16 mg, 85% over two steps) as a white foam. <sup>1</sup>H NMR (600 MHz, D<sub>2</sub>O) δ: 5.23 (d, *J* = 4.2 Hz, 1H, H-1<sup>A</sup>), 5.21 (d, *J* = 3.6 Hz, 1H, H-1<sup>B</sup>), 5.18 (d, *J* = 4.2 Hz, 1H, H-1<sup>C</sup>), 5.16 (d, *J* = 3.6 Hz, 1H, H-1<sup>D</sup>), 5.14 (d, *J* = 3.6 Hz, 1H, H-1<sup>E</sup>), 4.78 (d, *J* = 3.6 Hz, 1H, H-1<sup>F</sup>), 4.75 (d, *J* = 4.2 Hz, 1H, H-1<sup>G</sup>), 3.87 – 3.37 (m, 42H), 3.25 – 3.21 (m, 2H), 3.04 – 2.92 (m, 2H), 1.87 – 1.78 (m, 2H). <sup>13</sup>C NMR (150 MHz, D<sub>2</sub>O) δ: 99.86 (C-1<sup>E</sup>), 99.81 (C-1<sup>C</sup>), 99.75 (C-1<sup>D</sup>), 99.56 (C-1<sup>B</sup>), 99.32 (C-1<sup>A</sup>), 98.37 (C-1<sup>F</sup>), 98.00 (C-1<sup>G</sup>), 78.59, 77.65, 77.24, 76.64, 76.54, 73.37, 73.23, 73.20, 73.11, 72.88, 72.79, 72.71, 72.59, 71.69, 71.56, 71.52, 71.26, 71.23, 71.20, 71.17, 71.00, 70.77, 70.23, 70.22, 70.12, 69.16, 69.15, 67.32, 65.75, 60.53, 60.43, 60.36, 60.34, 60.32, 60.23, 37.67, 26.37. HR ESI-TOF MS (m/z): calcd for C<sub>45</sub>H<sub>80</sub>NO<sub>36</sub> [M + H]<sup>+</sup>, 1210.4460, found, 1210.4484.

***p*-Tolyl 6-*O*-benzoyl-2,3,4-tri-*O*-benzyl- $\alpha$ -D-glucopyranosyl-(1 $\rightarrow$ 4)-6-*O*-benzoyl-2,3-di-*O*-benzyl- $\alpha$ -D-glucopyranosyl-(1 $\rightarrow$ 6)-2,3-di-*O*-benzyl-1-thio- $\beta$ -D-glucopyranoside (**64**)**

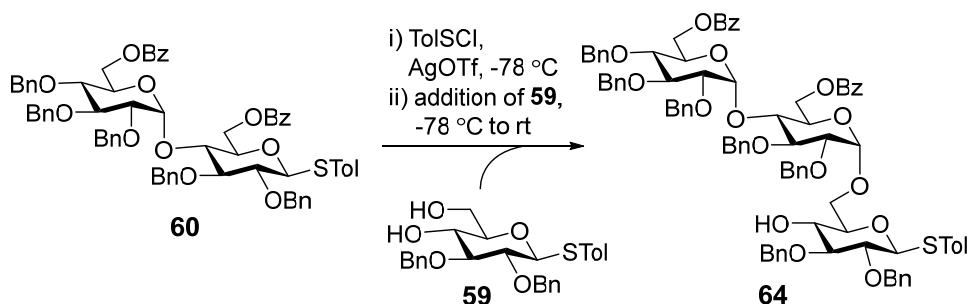

Donor **60** (300 mg, 0.27 mmol) reacted with acceptor **59** (115 mg, 0.25 mmol) by the general procedure for glycosylation to give product **64** (286 mg, 80%) as a syrup after column purification (hexanes/ethyl acetate, 6:1) with the stereochemistry determined by  $J_{H1',H2'}$  coupling constant.  $^1\text{H}$  NMR (600 MHz,  $\text{CDCl}_3$ )  $\delta$ : 8.04 (d,  $J$  = 8.4 Hz, 2H, Ph), 7.97 (d,  $J$  = 8.4 Hz, 2H, Ph), 7.57 – 6.96 (m, 45H, Ph), 5.60 (d,  $J$  = 3.6 Hz, 1H, H-1''), 5.01 (d,  $J$  = 11.4 Hz, 1H, Bn), 4.87 (d,  $J$  = 3.0 Hz, 1H, H-1'), 4.93 – 4.80 (m, 6H, Bn), 4.76 (d,  $J$  = 10.8 Hz, 1H, Bn), 4.72 – 4.52 (m, 9H, H-1, H-6a', 6b', Bn), 4.39 (dd,  $J$  = 12.0, 1.8 Hz, 1H, H-6a''), 4.33 (dd,  $J$  = 12.0, 3.6 Hz, 1H, H-6b''), 4.20 – 4.04 (m, 2H, H-3', H-5'), 4.04 – 3.94 (m, 4H, H-3'', H-4', H-5'', H-6a), 3.73 (t,  $J$  = 9.6 Hz, 1H, H-4), 3.62 – 3.57 (m, 3H, H-2', H-4'', H-6b), 3.54 (t,  $J$  = 9.0 Hz, 1H, H-3), 3.51 – 3.46 (m, 2H, H-5, H-2''), 3.33 (t,  $J$  = 9.6 Hz, 1H, H-2), 3.06 – 2.98 (m, 1H, OH), 2.25 (s, 3H,  $\text{PhCH}_3$ ).  $^{13}\text{C}$  NMR (150 MHz,  $\text{CDCl}_3$ )  $\delta$ : 166.13, 165.96, 138.95, 138.60, 138.34, 138.06, 137.87, 137.80, 137.77, 133.13, 132.95, 132.64, 129.92, 129.88, 129.78, 129.76, 129.72, 129.66, 128.55, 128.52, 128.51, 128.47, 128.44, 128.41, 128.36, 128.33, 128.31, 128.25, 128.18, 127.96, 127.92, 127.85, 127.81, 127.78, 127.68, 127.57, 127.52, 127.03, 126.56, 97.35 (C-1''), 97.01 (C-1'), 88.28 (C-1), 86.12, 81.70, 81.29, 80.28, 80.16, 79.48, 77.63, 77.26, 75.74, 75.49, 75.35, 75.02, 74.62, 74.31, 73.44, 72.94, 72.13, 70.04, 68.41, 68.07, 63.82, 63.25, 21.10. HR ESI-TOF MS ( $m/z$ ): calcd for  $\text{C}_{88}\text{H}_{92}\text{NO}_{17}\text{S}$  [ $\text{M} + \text{NH}_4$ ] $^+$ , 1466.6086; found, 1466.6102.

***p*-Tolyl 4,6-di-*O*-[6-*O*-benzoyl-2,3,4-tri-*O*-benzyl- $\alpha$ -D-glucopyranosyl-(1 $\rightarrow$ 4)-6-*O*-benzoyl-2,3-di-*O*-benzyl- $\alpha$ -D-glucopyranosyl]-2,3-di-*O*-benzyl-1-thio- $\beta$ -D-glucopyranoside (**57**)**

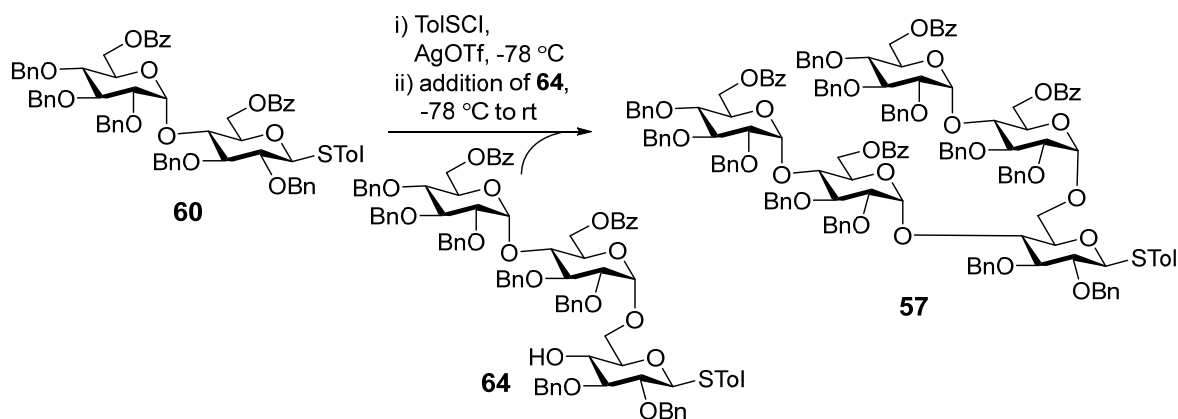

Donor **60** (180 mg, 0.16 mmol) reacted with acceptor **64** (214 mg, 0.15 mmol) by the general procedure for glycosylation to give product **57** (316 mg, 88%) as a syrup after column purification

(hexanes/ethyl acetate, 8:1) with the stereochemistry determined by  $J_{H1',H2'}$  coupling constant.  $^1\text{H}$  NMR (600 MHz,  $\text{CDCl}_3$ )  $\delta$ : 8.05 (d,  $J = 7.8$  Hz, 2H, Ph), 8.01 (d,  $J = 7.8$  Hz, 2H, Ph), 7.94 (d,  $J = 8.4$  Hz, 4H, Ph), 7.53 – 6.91 (m, 76H, Ph), 5.63 (d,  $J = 3.6$  Hz, 1H, H-1<sup>A</sup>), 5.58 (d,  $J = 3.6$  Hz, 1H, H-1<sup>B</sup>), 5.36 (d,  $J = 3.0$  Hz, 1H, H-1<sup>C</sup>), 5.24 (d,  $J = 3.0$  Hz, 1H, H-1<sup>D</sup>), 5.09 (d,  $J = 11.4$  Hz, 1H, Bn), 4.95 (d,  $J = 11.4$  Hz, 1H, Bn), 4.90 – 4.64 (m, 13H, Bn), 4.68 – 4.44 (m, 12H, H-1<sup>E</sup>, Bn), 4.42 – 4.16 (m, 8H), 4.15 – 3.83 (m, 11H), 3.69 (t,  $J = 8.4$  Hz, 1H), 3.60 (t,  $J = 9.6$  Hz, 1H, H-3<sup>E</sup>), 3.58 – 3.52 (m, 3H), 3.52 – 3.39 (m, 3H), 3.23 (t,  $J = 9.6$  Hz, 1H, H-2<sup>E</sup>), 2.23 (s, 3H,  $\text{PhCH}_3$ ).  $^{13}\text{C}$  NMR (150 MHz,  $\text{CDCl}_3$ )  $\delta$ : 166.03, 165.95, 165.90, 165.89, 138.92, 138.68, 138.39, 138.31, 138.06, 137.89, 137.86, 137.85, 137.82, 137.72, 137.71, 137.54, 133.16, 133.03, 132.94, 132.88, 132.76, 130.89, 130.11, 129.96, 129.93, 129.89, 129.78, 129.73, 129.70, 129.66, 129.66, 129.62, 128.81, 128.46, 128.41, 128.38, 128.36, 128.30, 128.26, 128.22, 128.20, 128.13, 128.08, 128.05, 127.99, 127.93, 127.88, 127.85, 127.78, 127.68, 127.64, 127.61, 127.55, 127.51, 127.47, 127.45, 127.35, 127.08, 127.00, 126.96, 126.86, 126.50, 126.38, 97.56 (C-1<sup>B</sup>), 97.14 (C-1<sup>A</sup>), 96.78 (C-1<sup>C</sup>), 96.21 (C-1<sup>D</sup>), 88.33 (C-1<sup>E</sup>), 85.54, 81.77, 81.64, 81.19, 80.84, 80.54, 80.27, 79.84, 79.43, 79.31, 78.36, 77.55, 75.70, 75.66, 75.29, 75.22, 75.05, 74.91, 74.19, 73.88, 73.38, 73.15, 72.56, 72.51, 70.04, 69.92, 69.53, 68.33, 65.60, 65.55, 63.79, 63.72, 63.17, 21.10. HR ESI-TOF MS ( $m/z$ ): calcd for  $\text{C}_{149}\text{H}_{150}\text{NO}_{29}\text{S}$  [ $\text{M} + \text{NH}_4$ ]<sup>+</sup>, 2449.0014; found, 2449.0010.

## II. NMR spectra of synthetic intermediates and final products

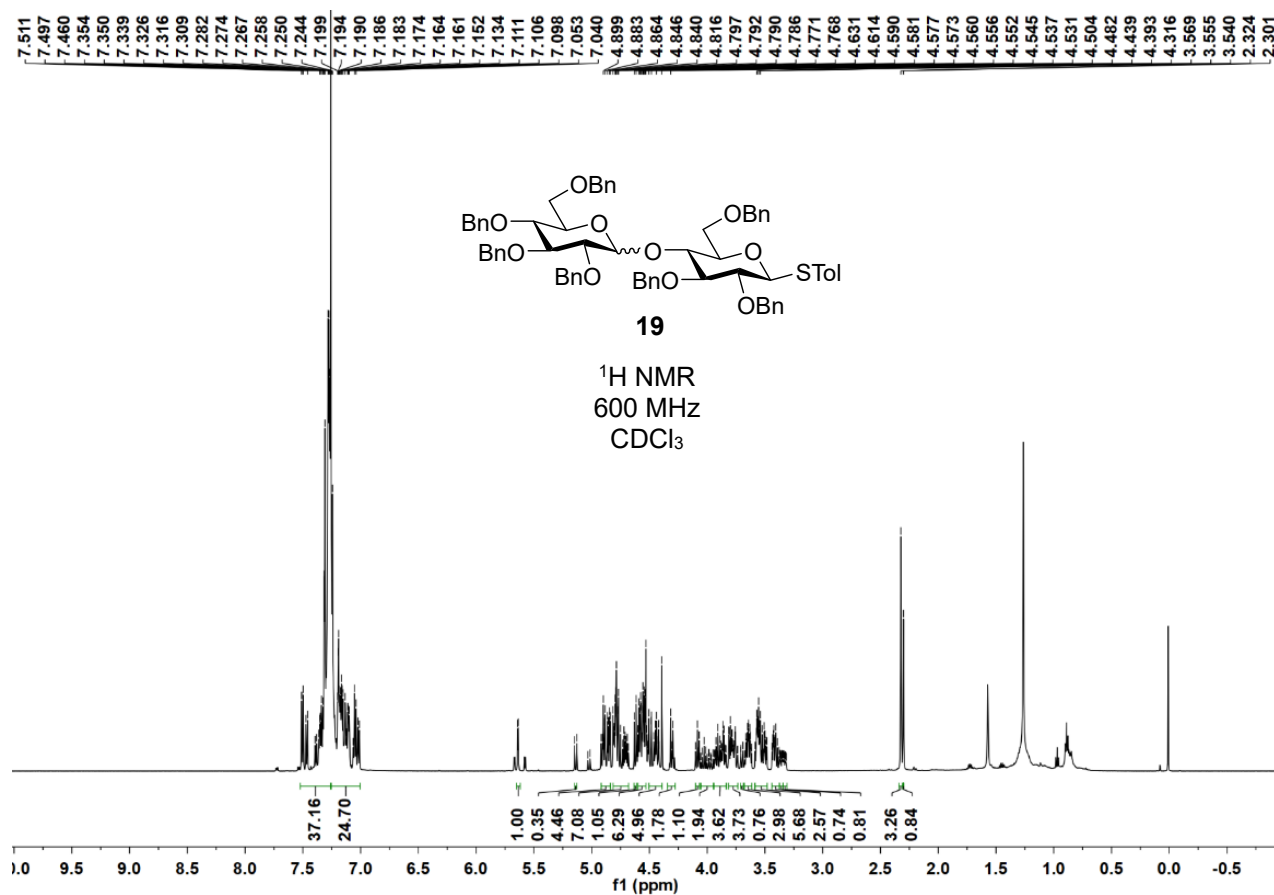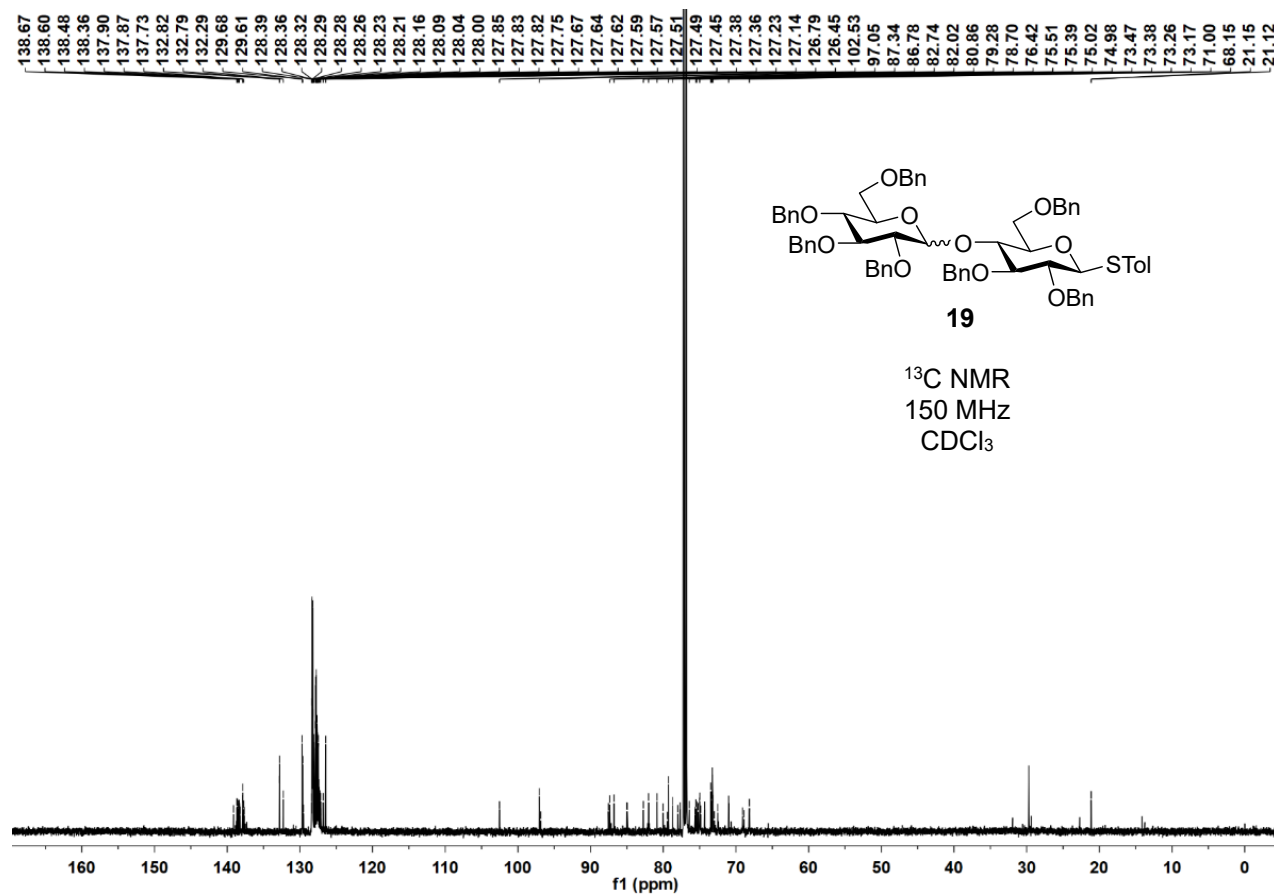

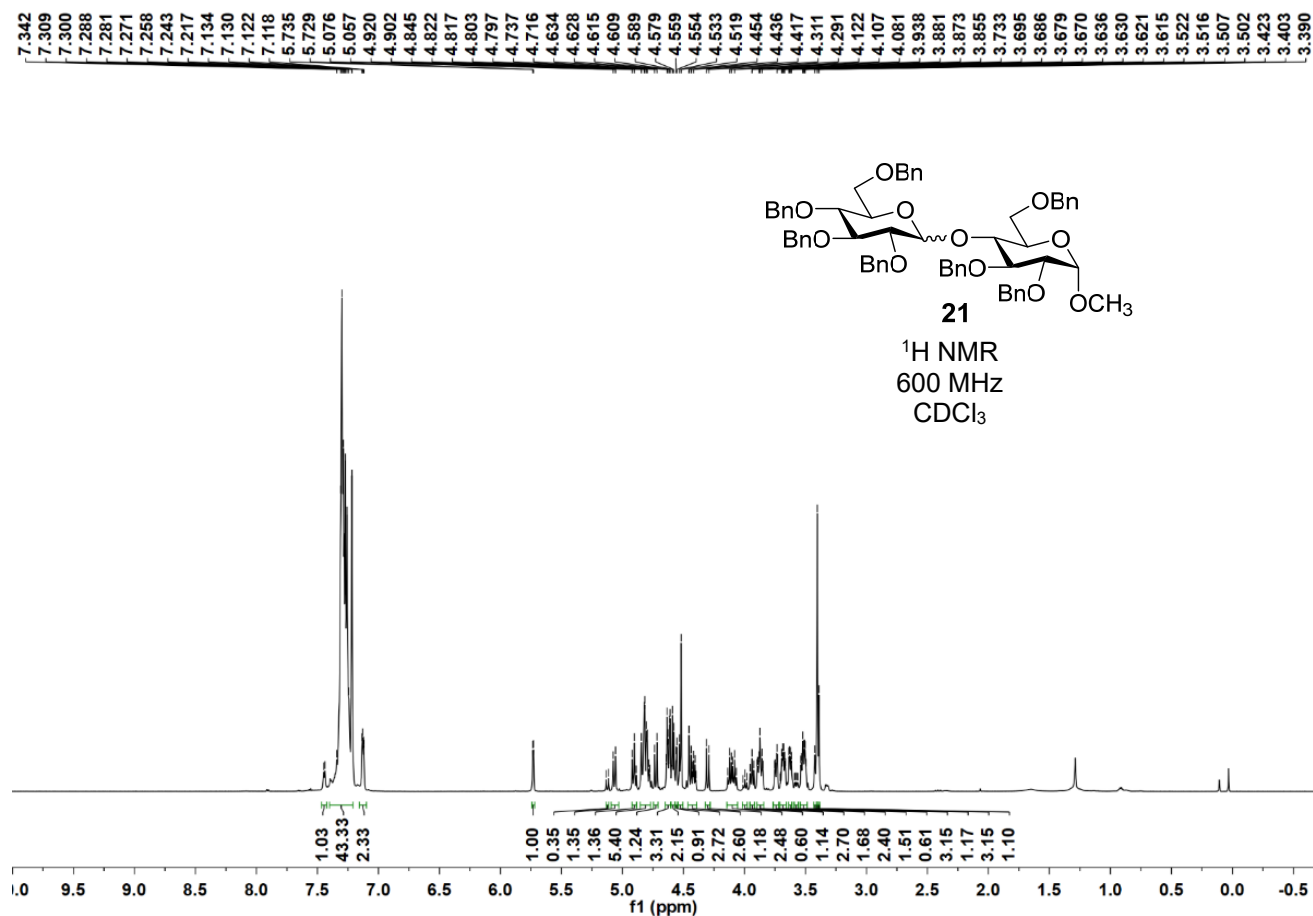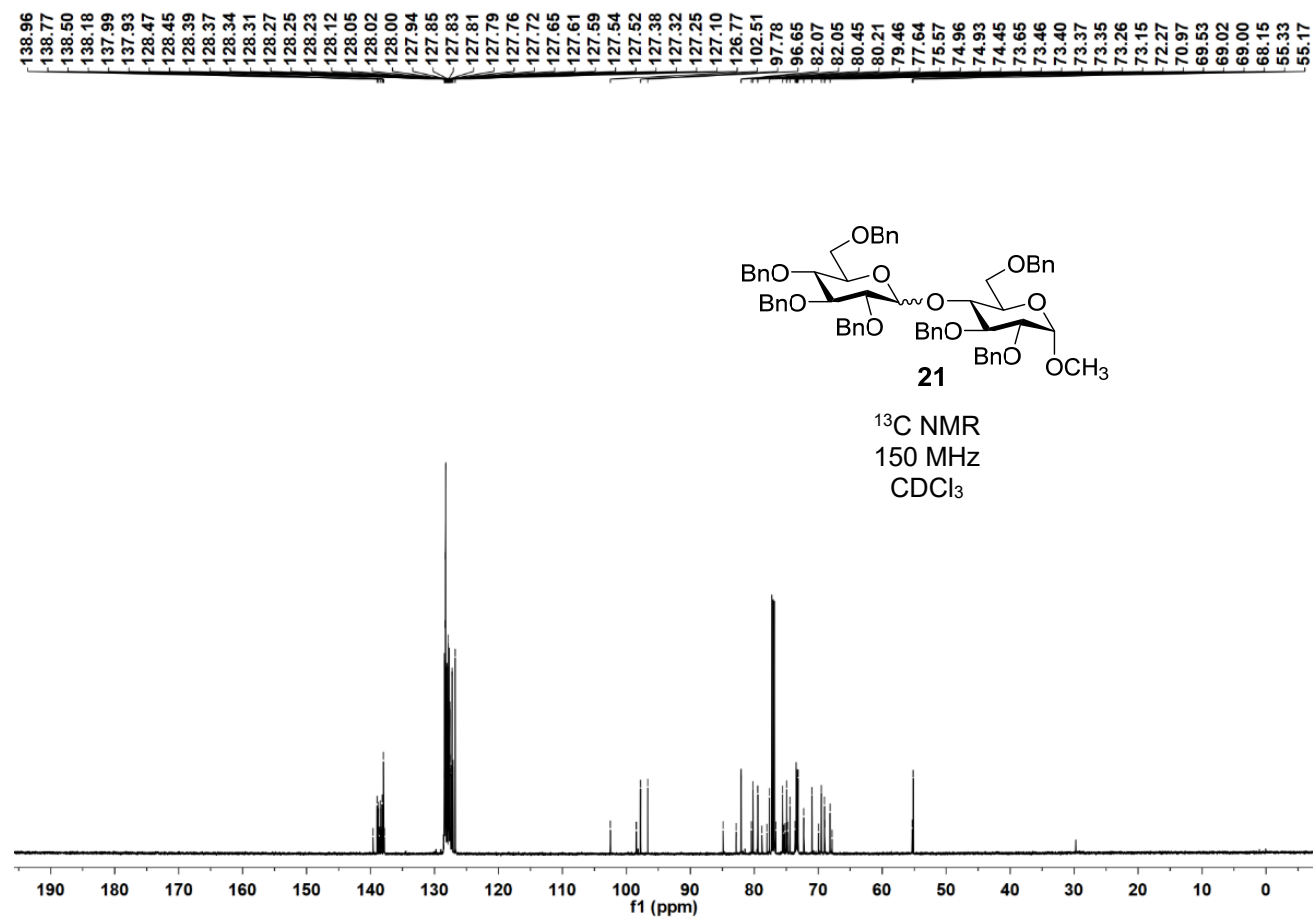



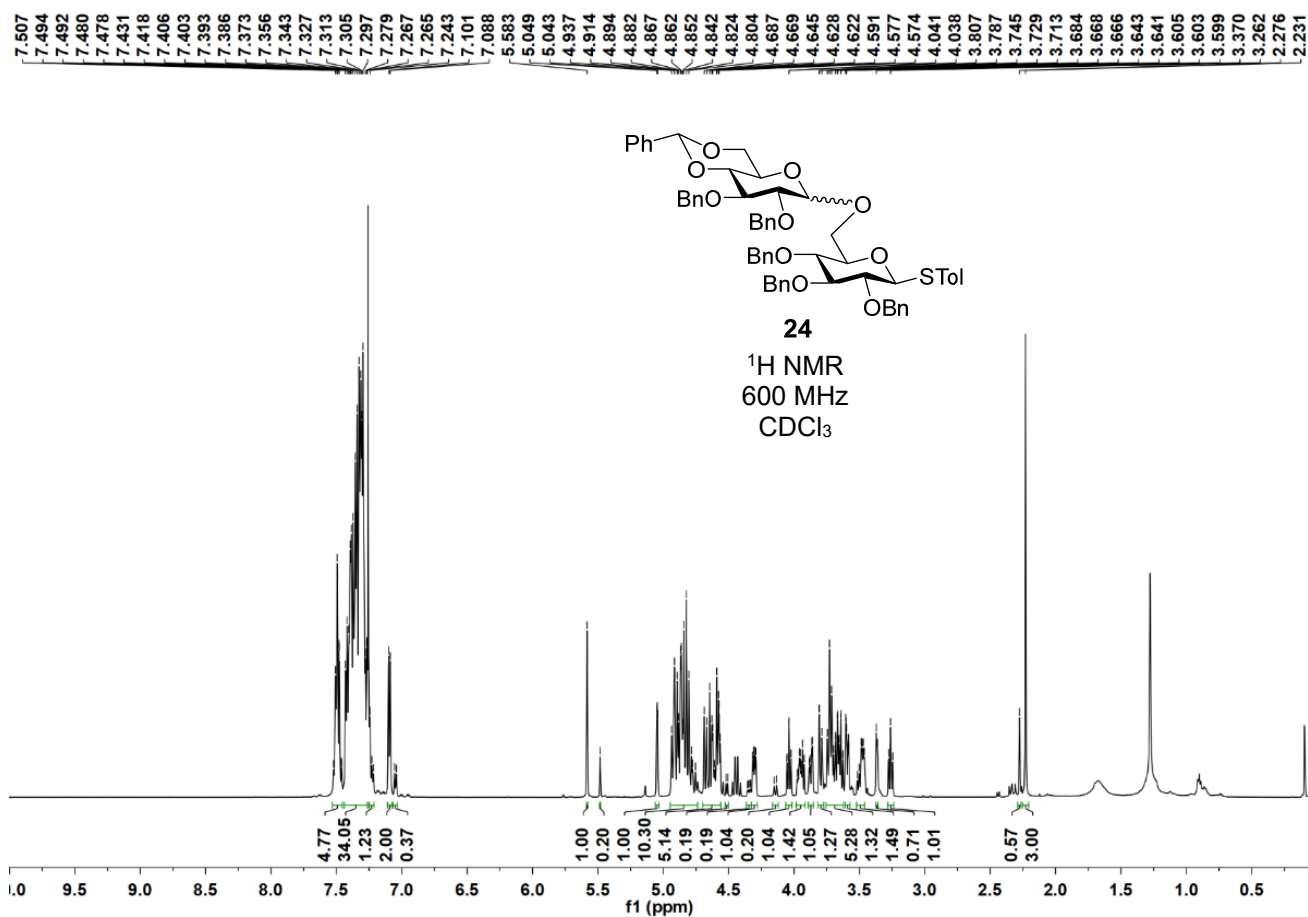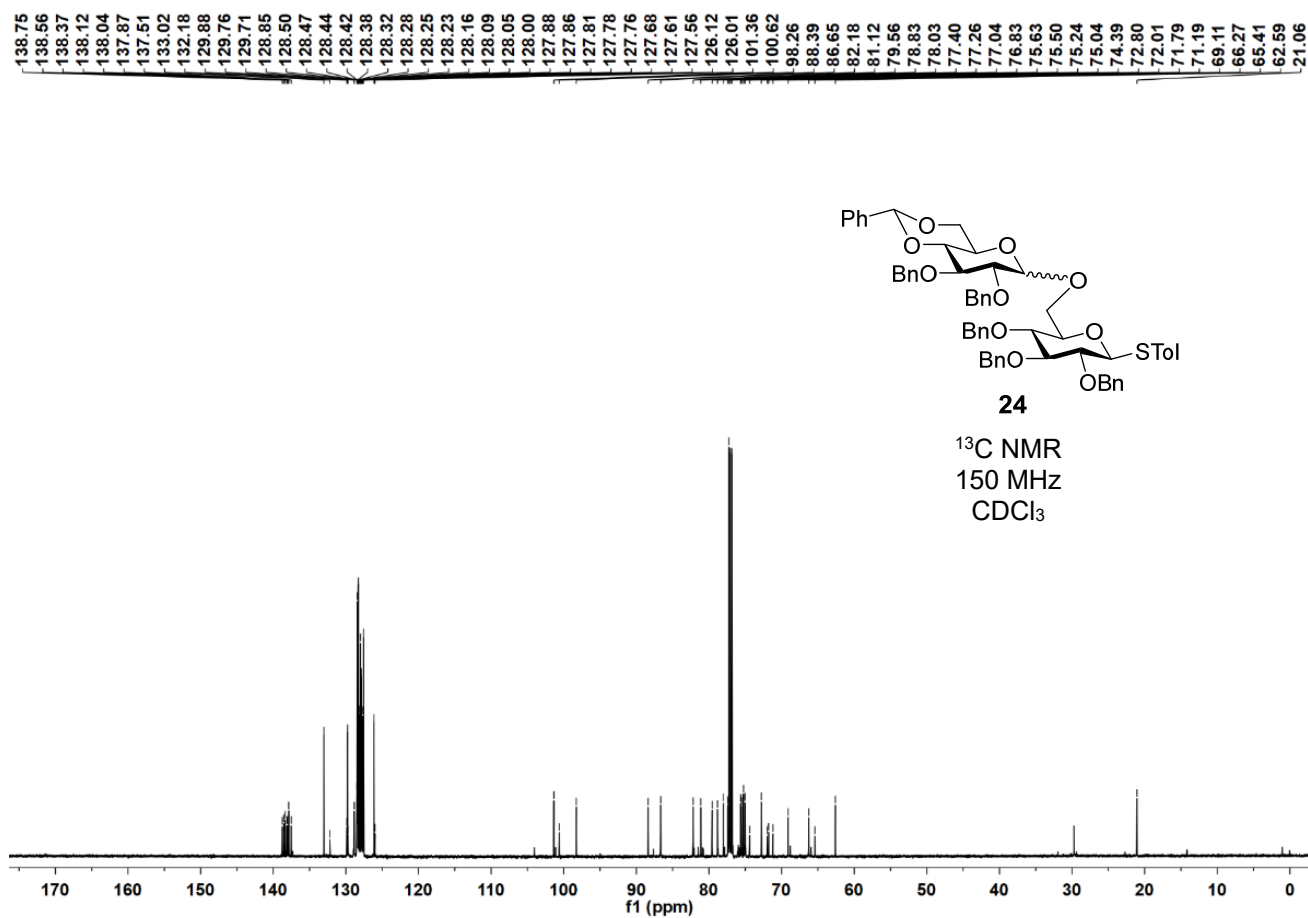



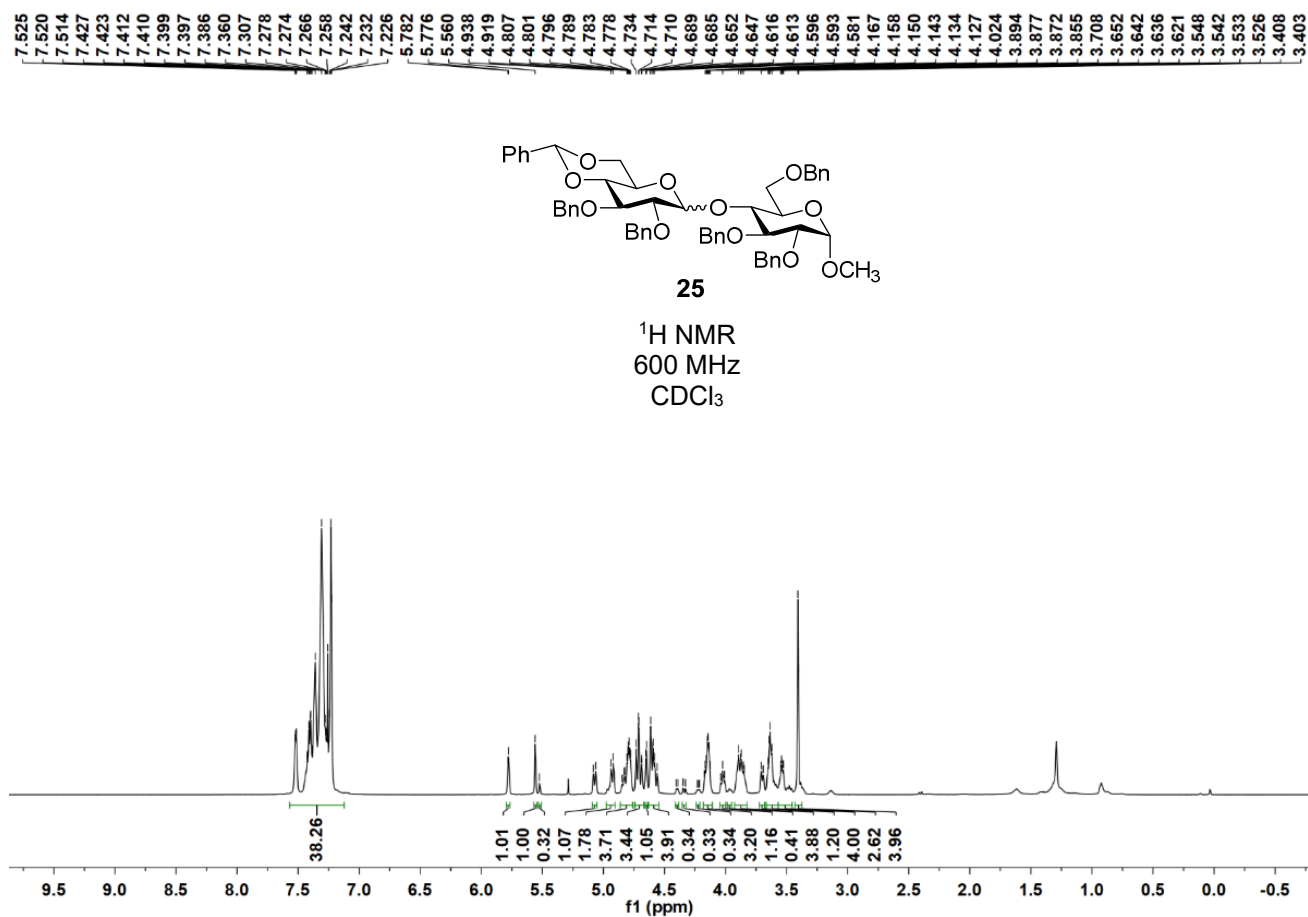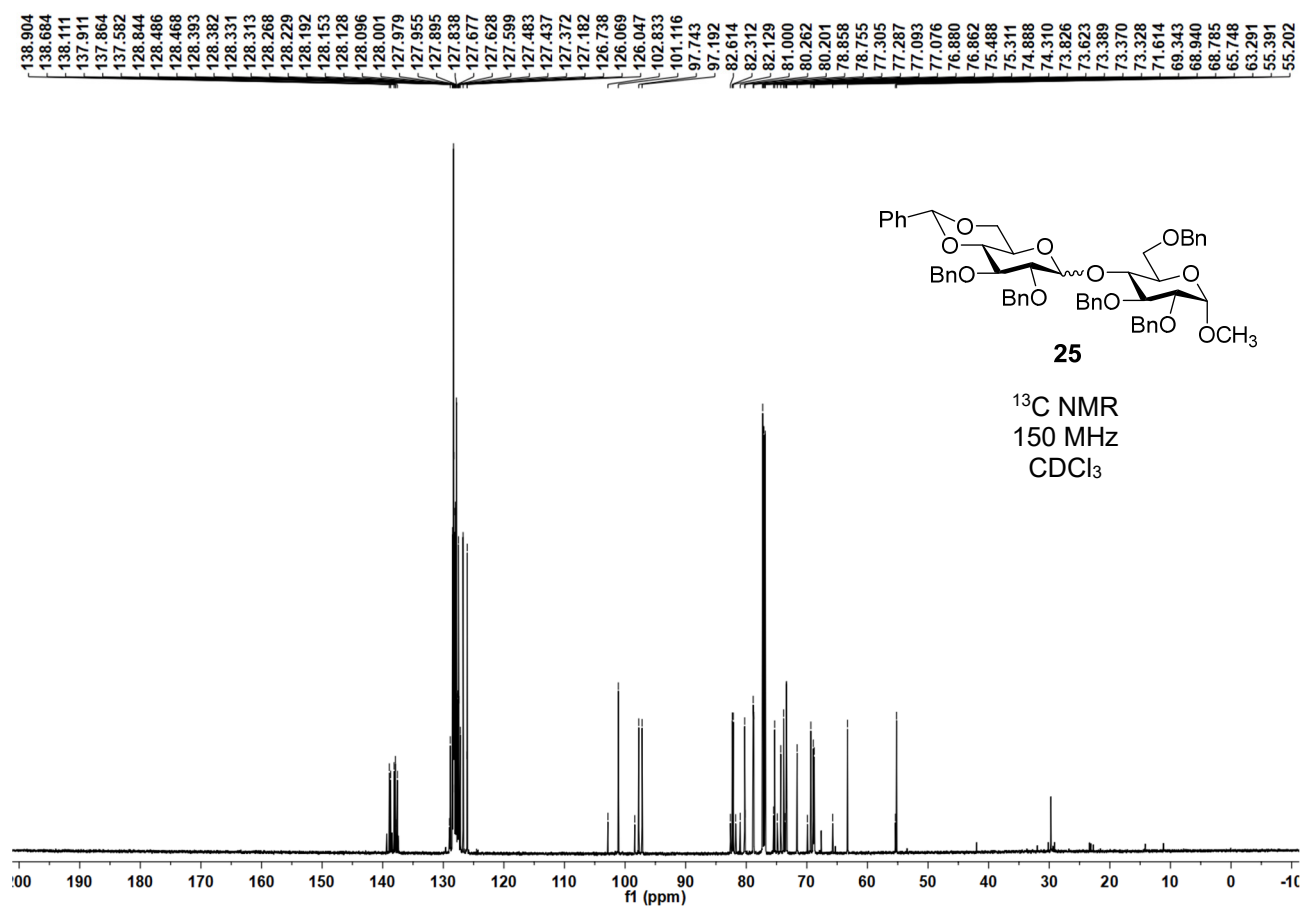

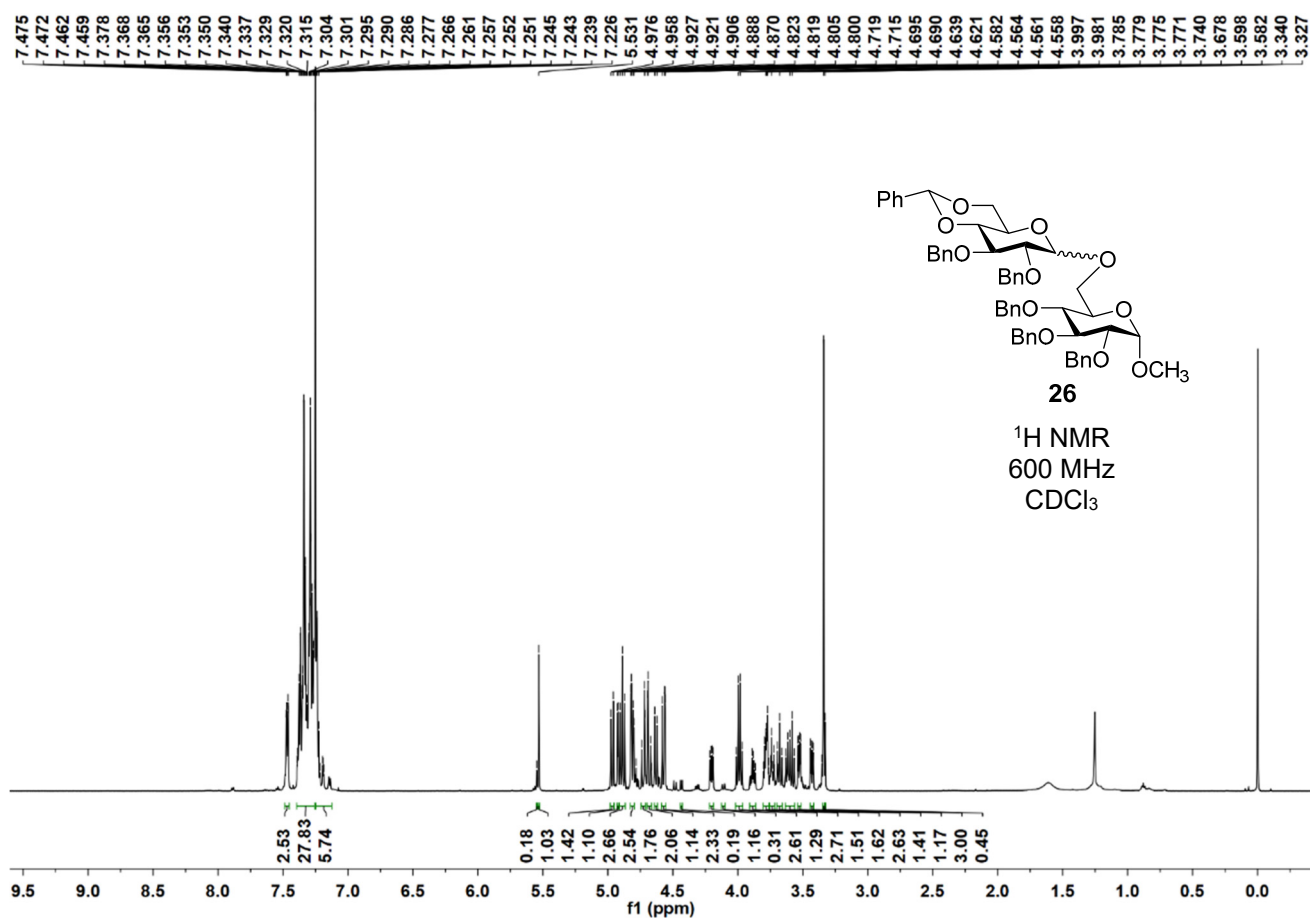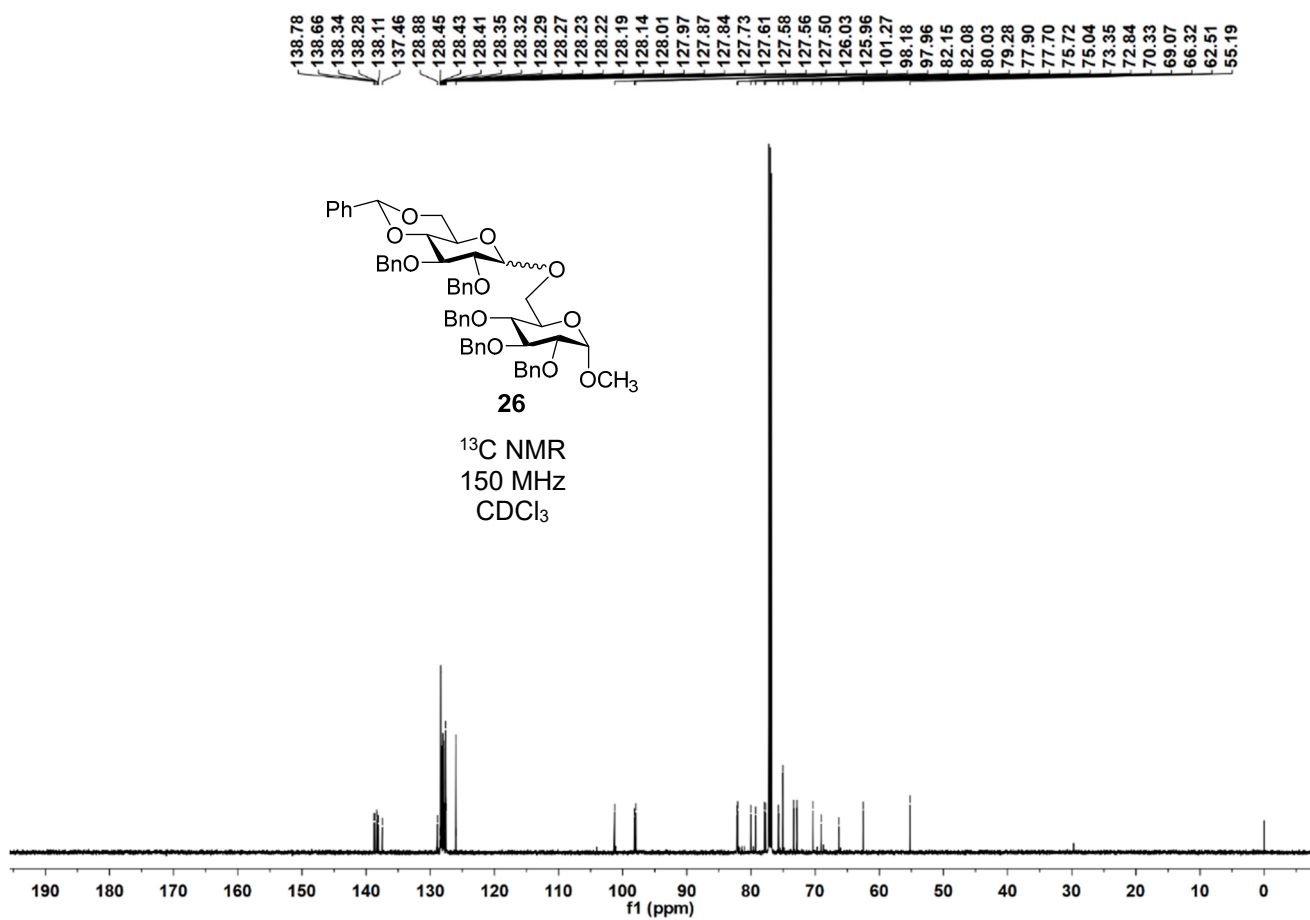

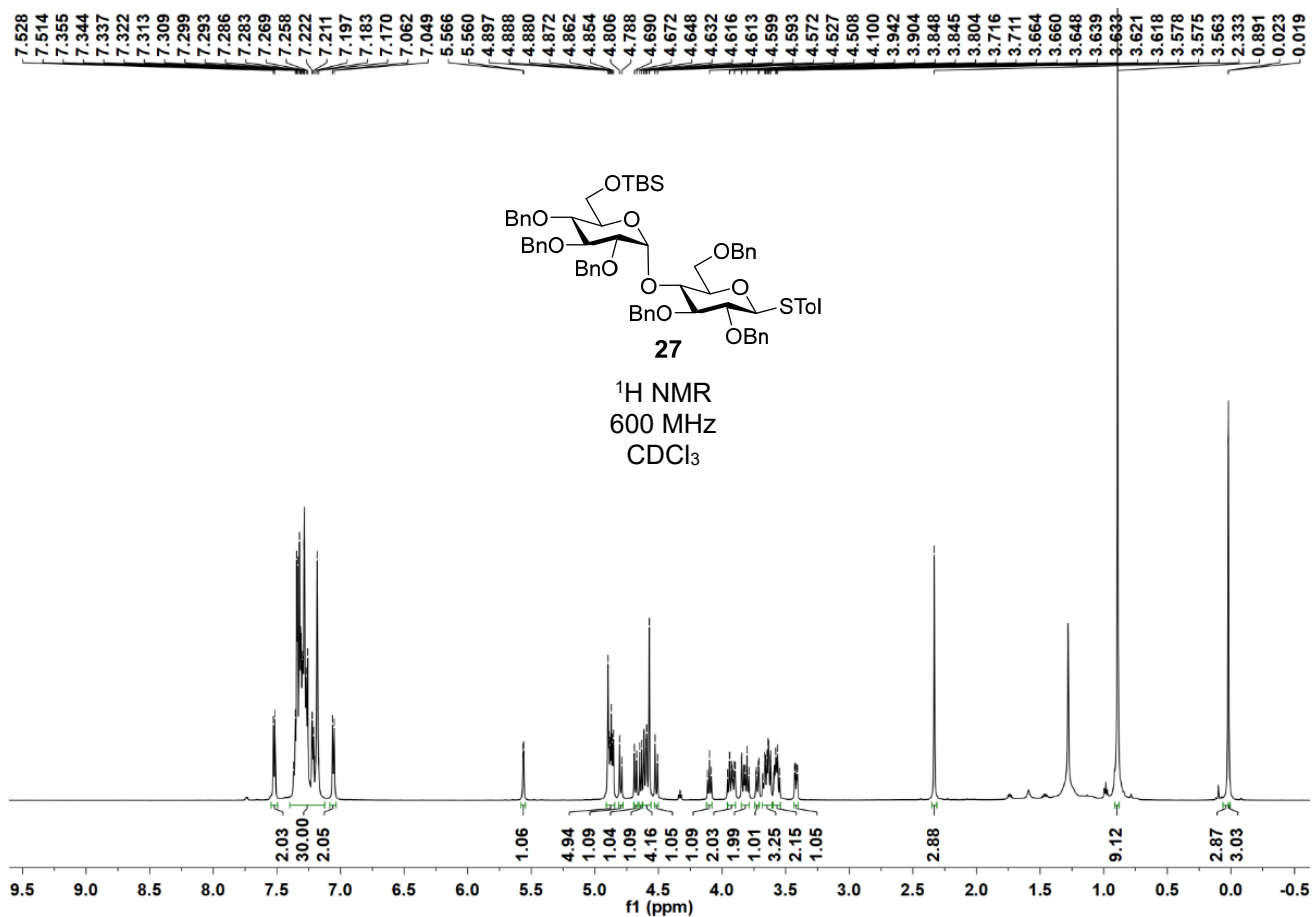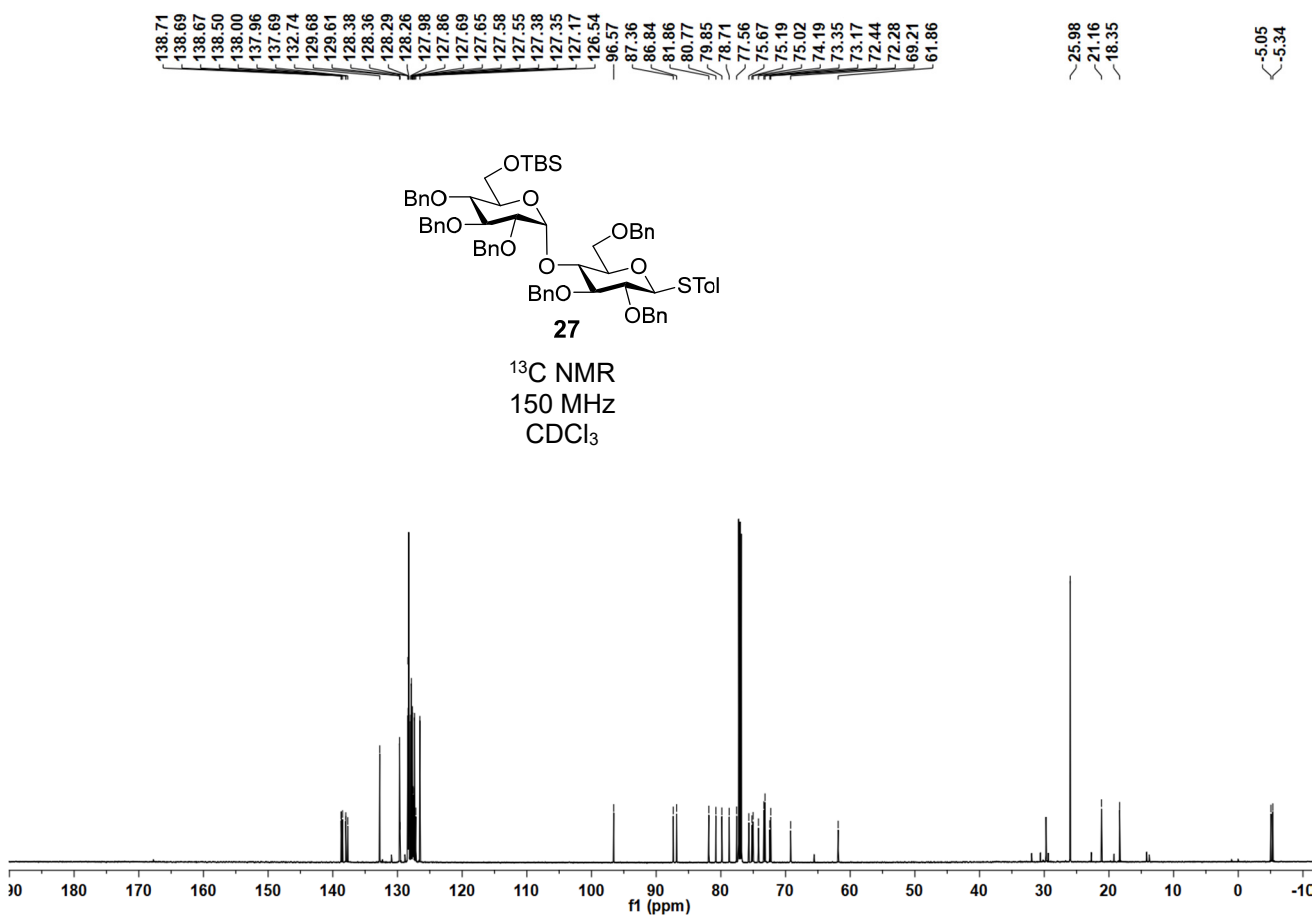

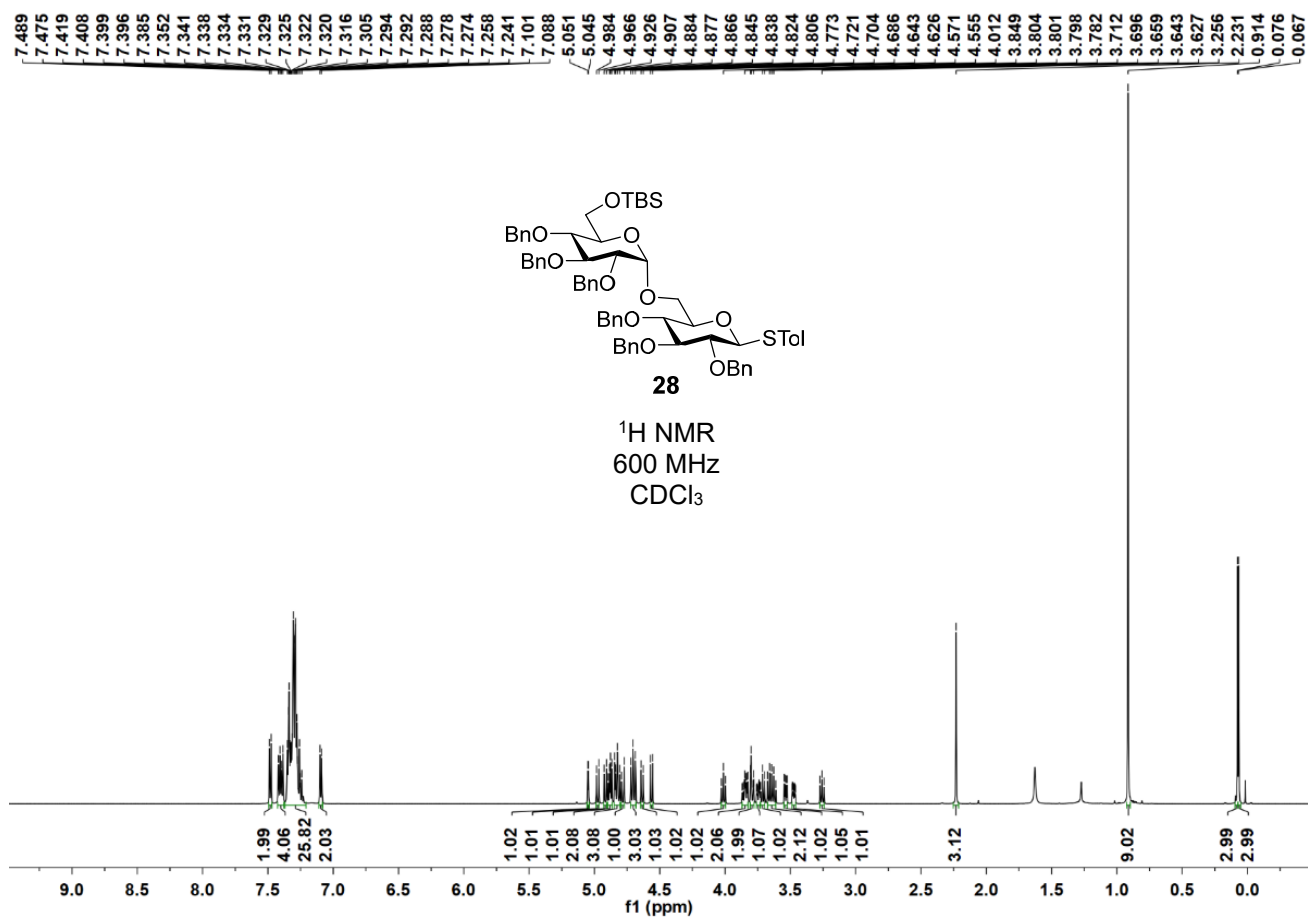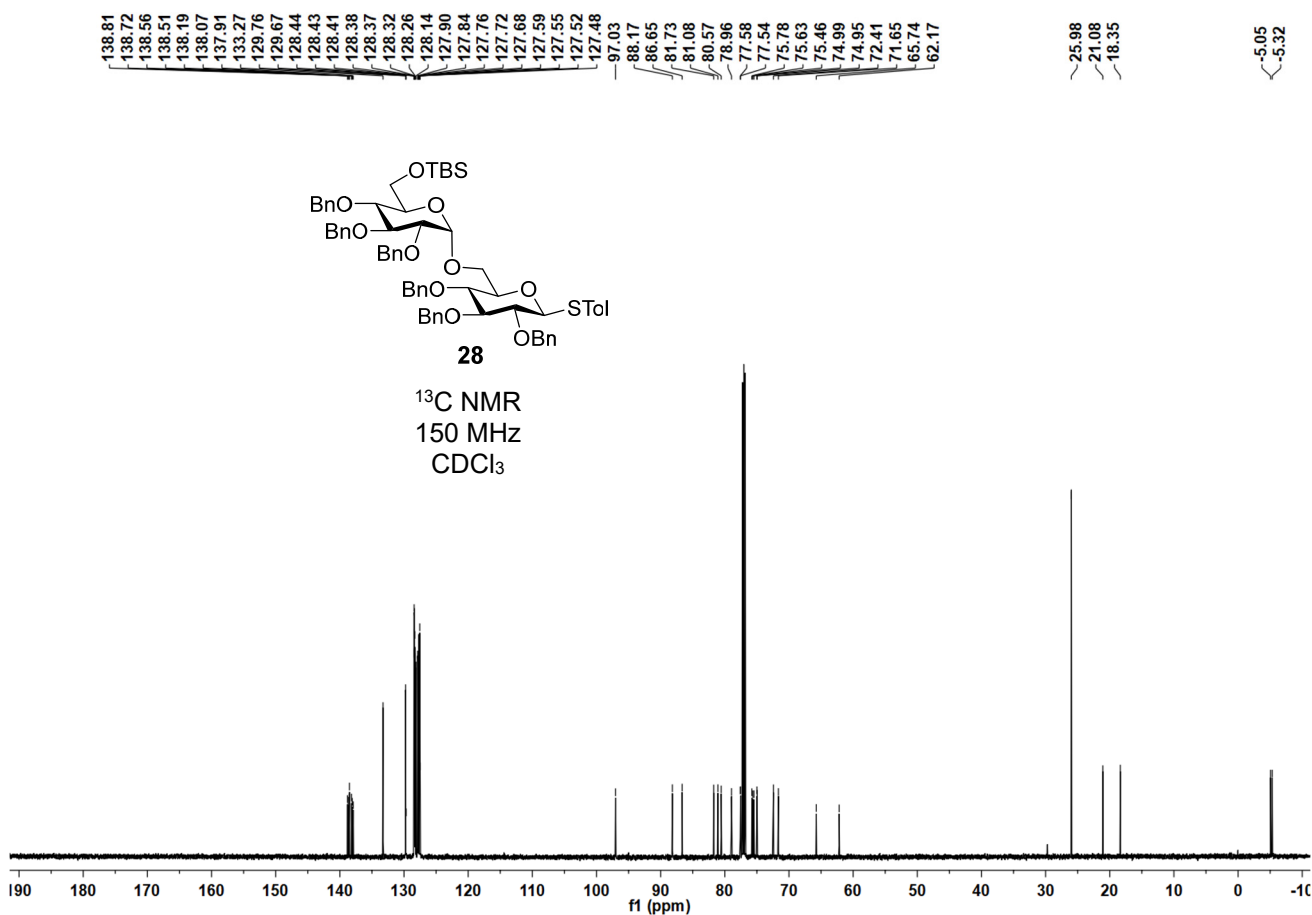

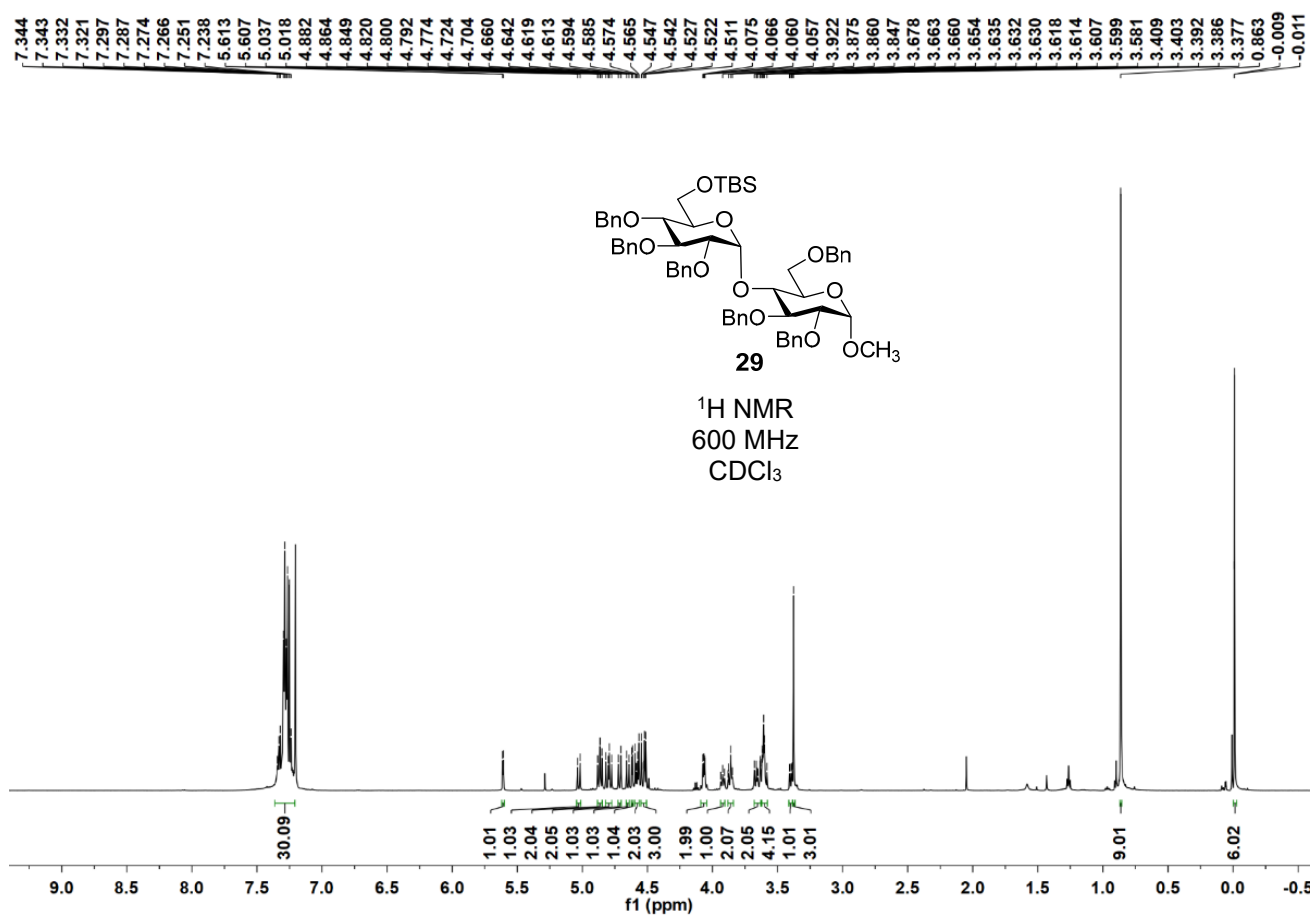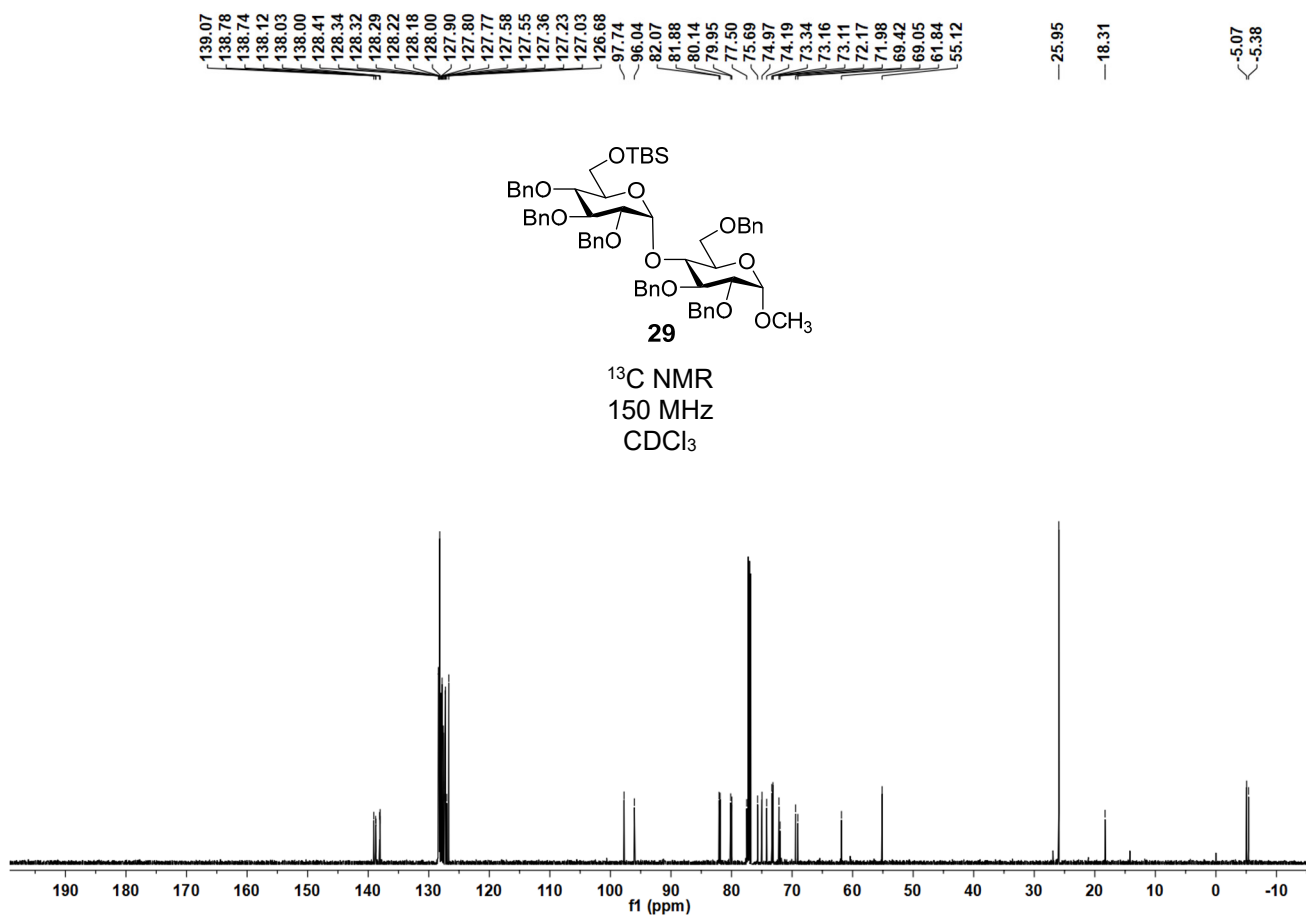

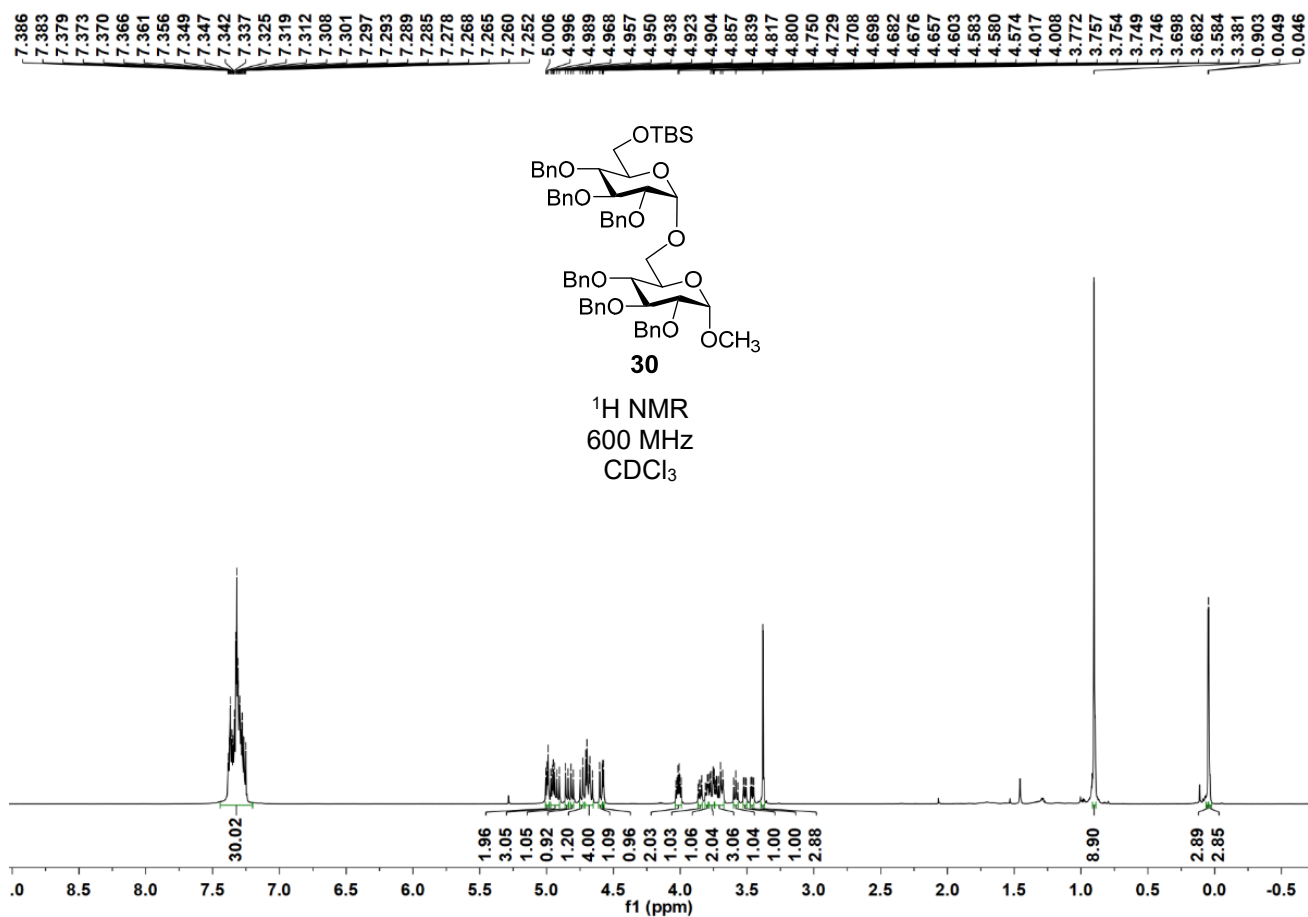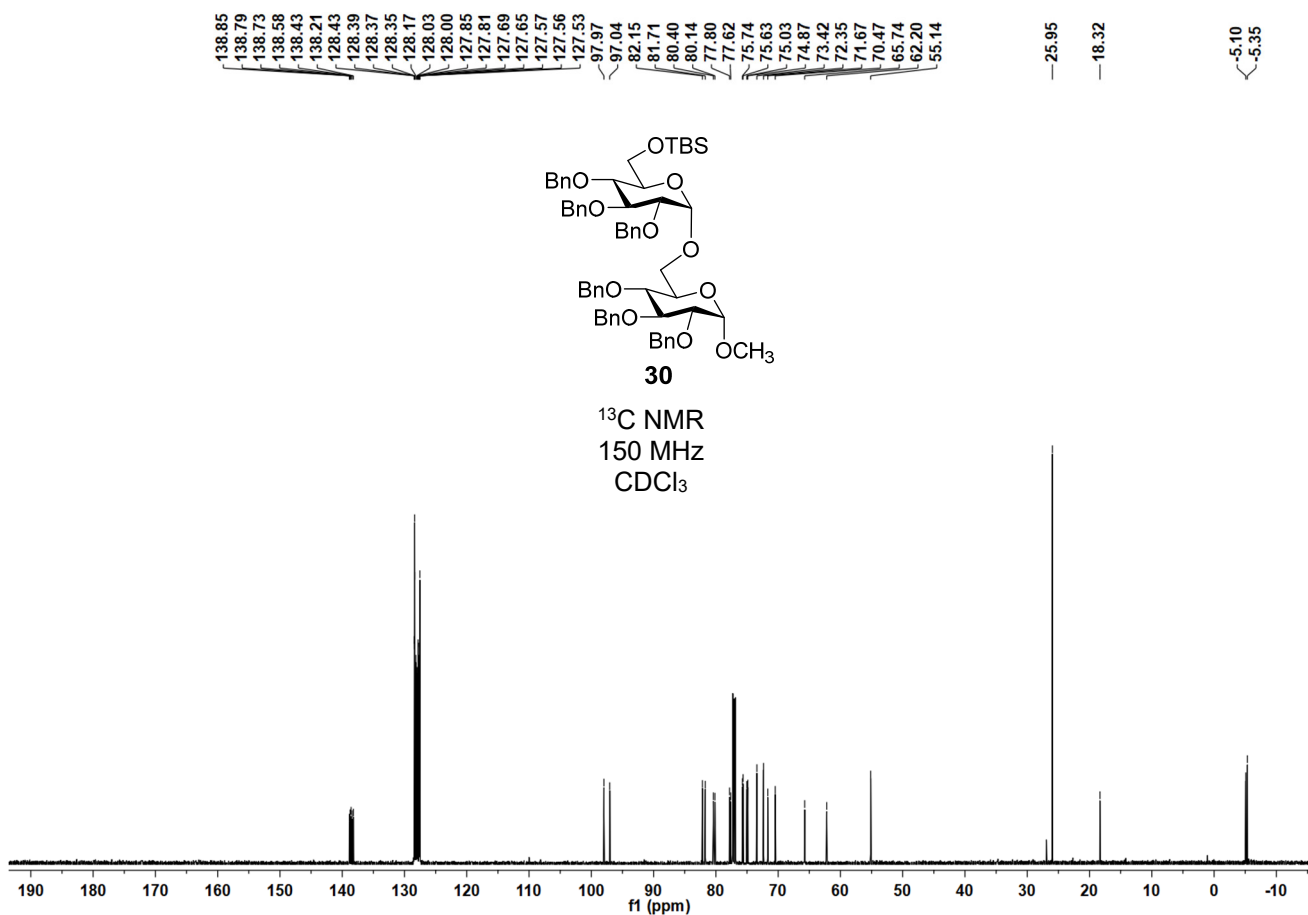

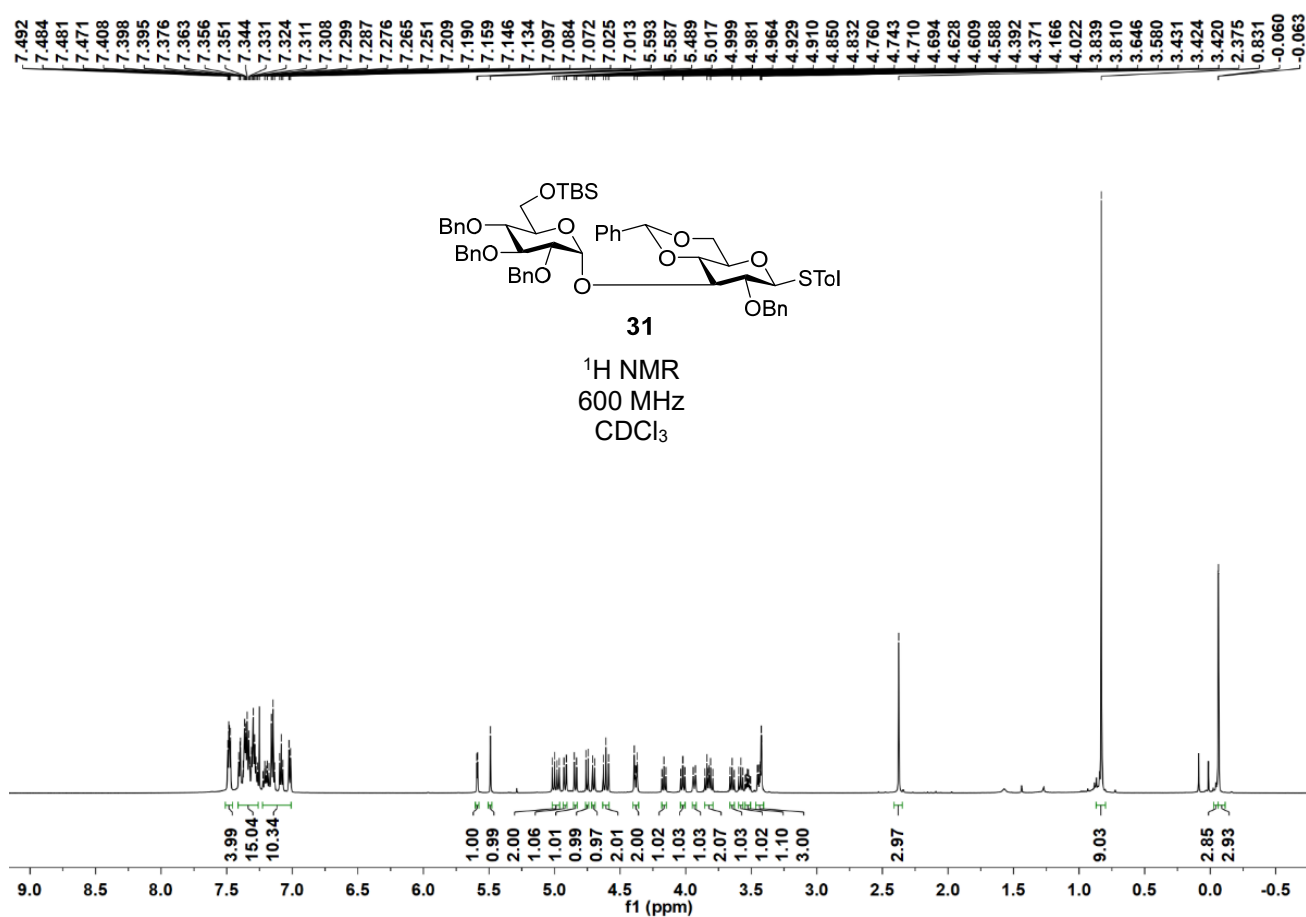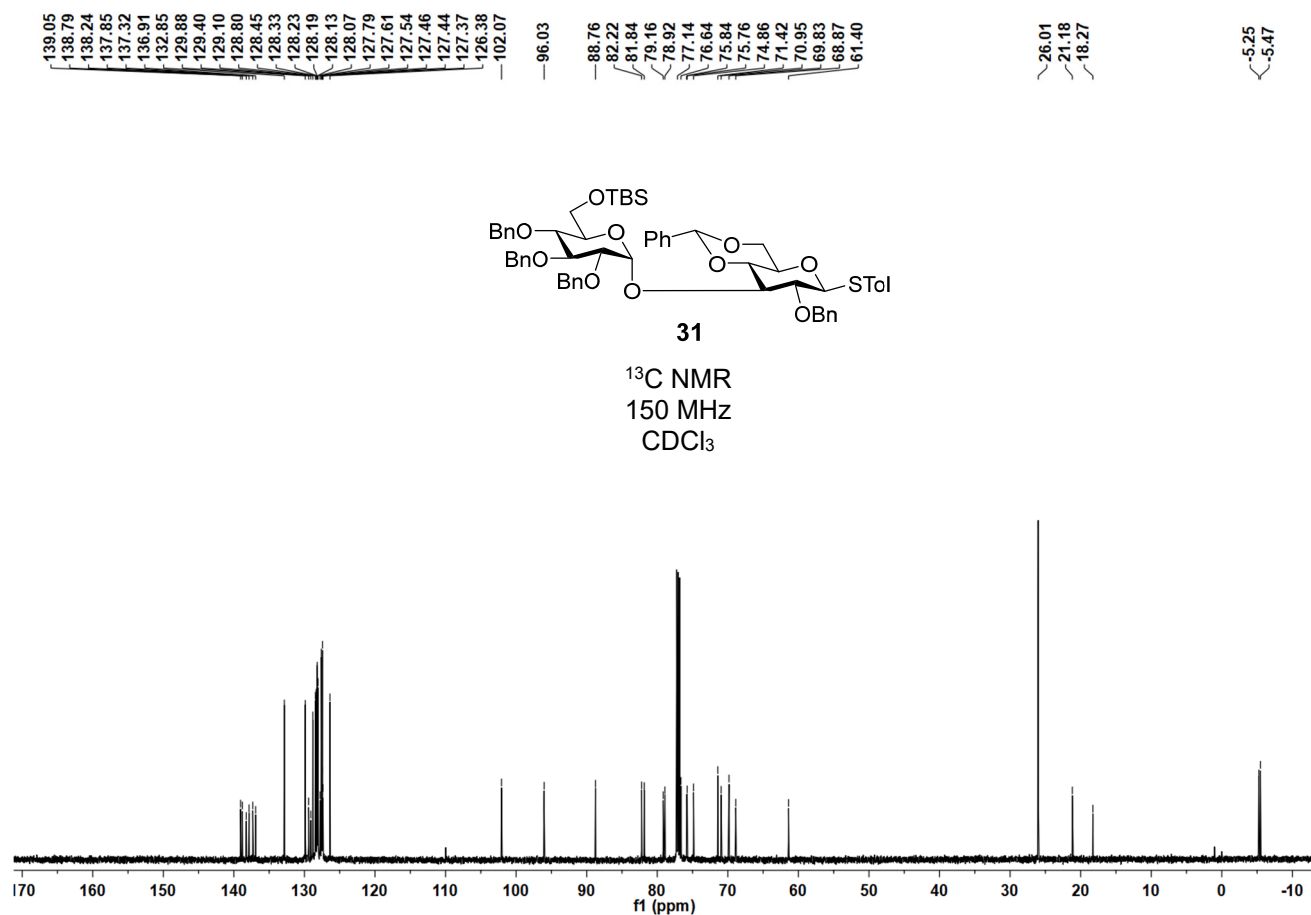

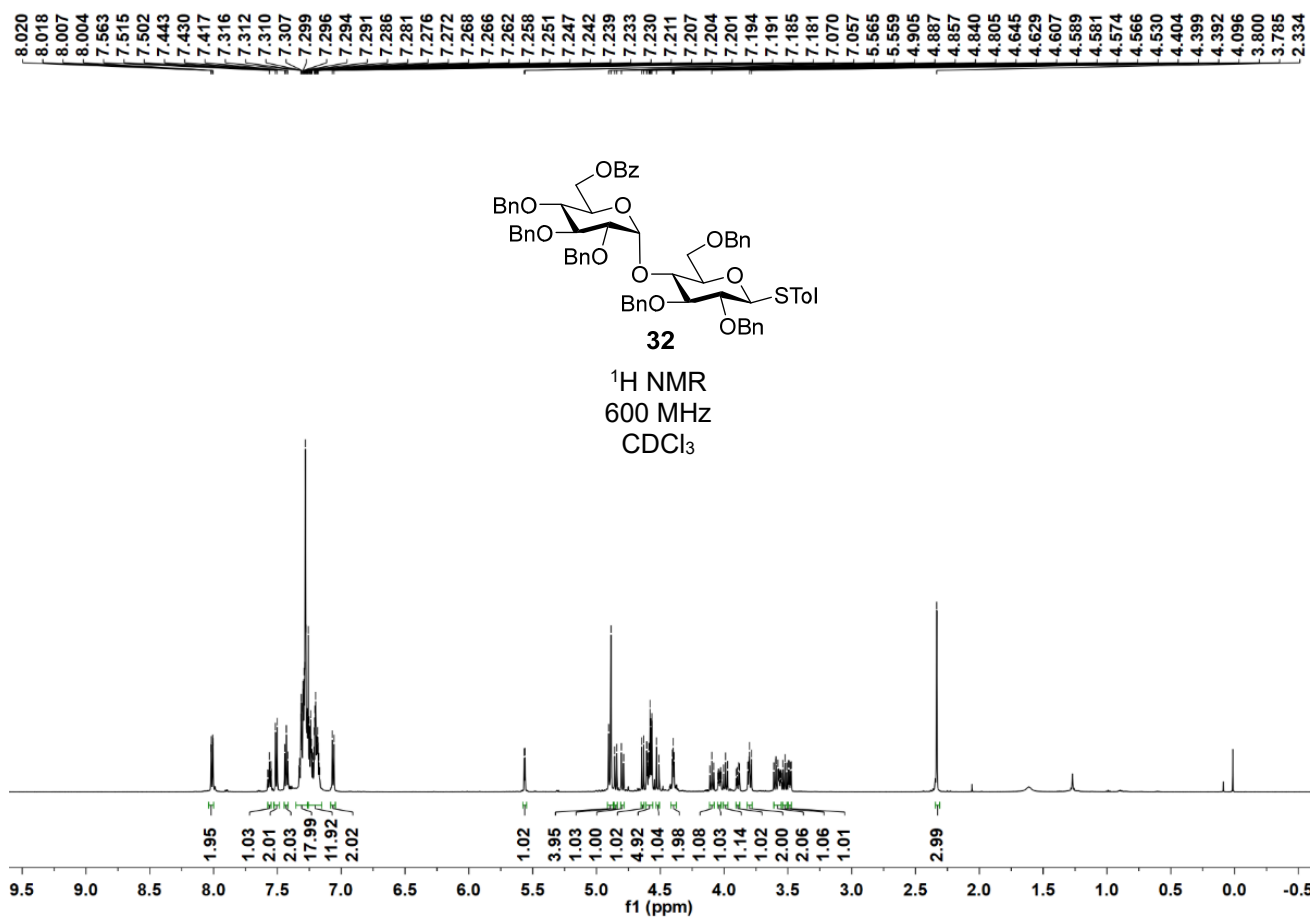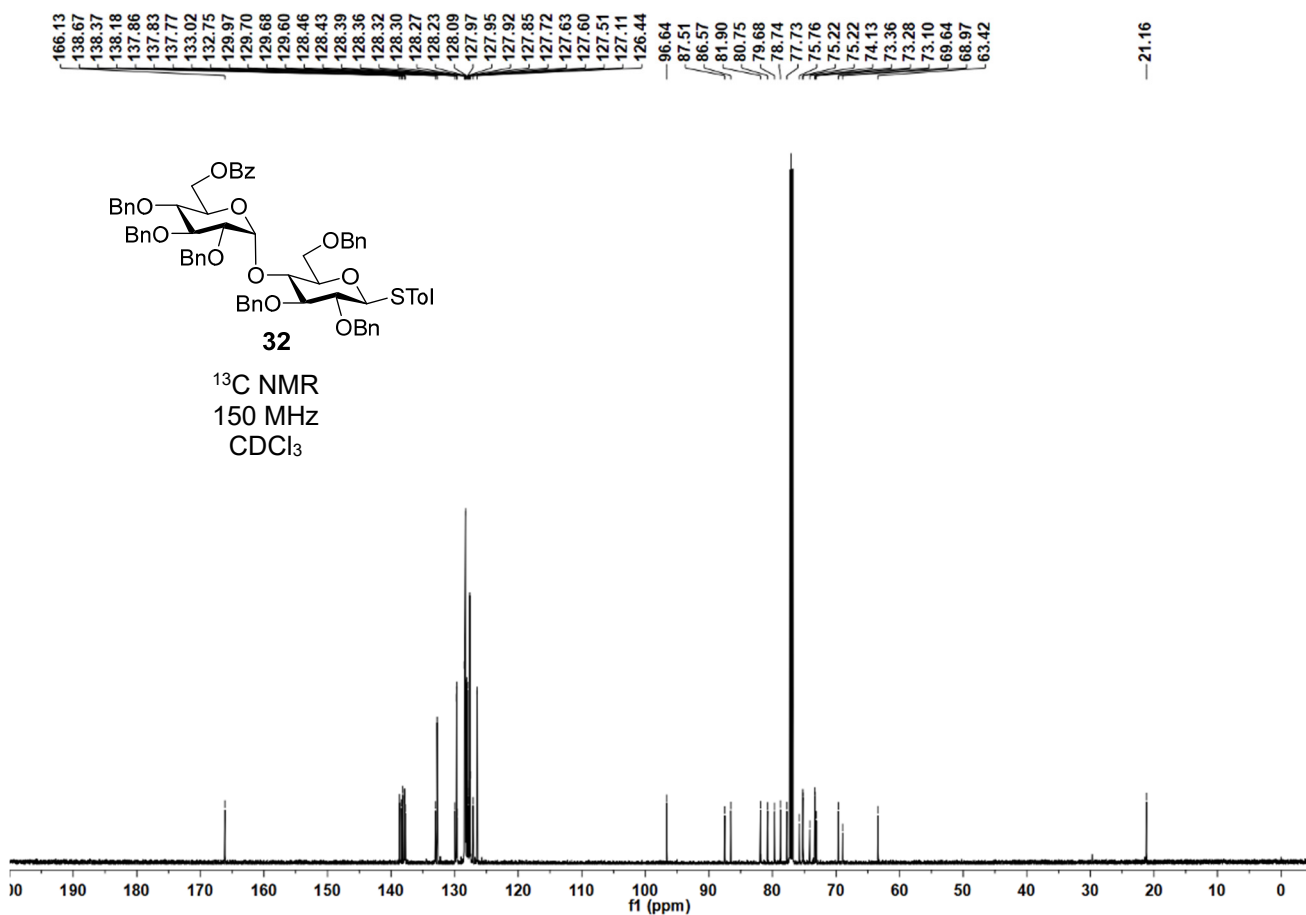





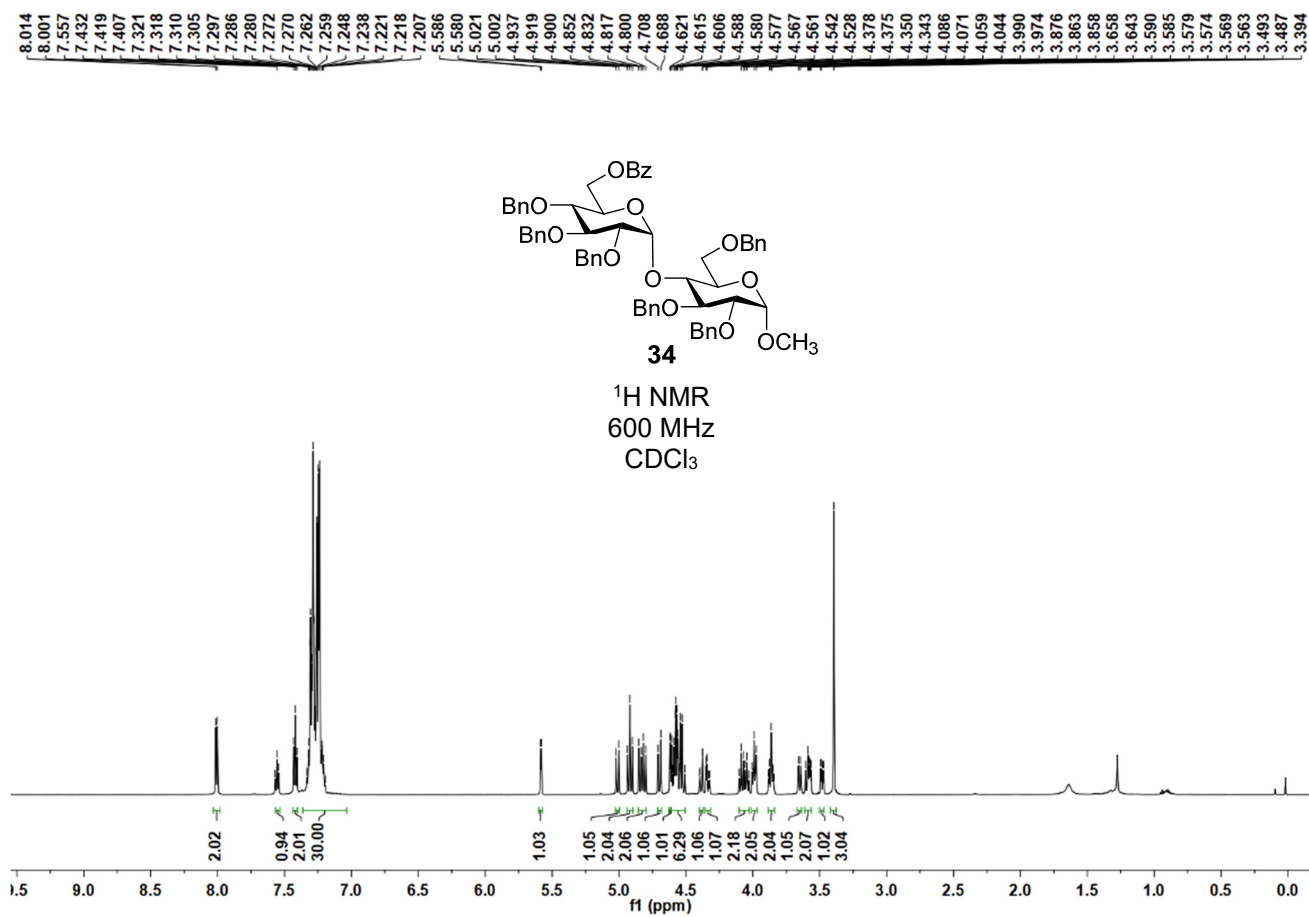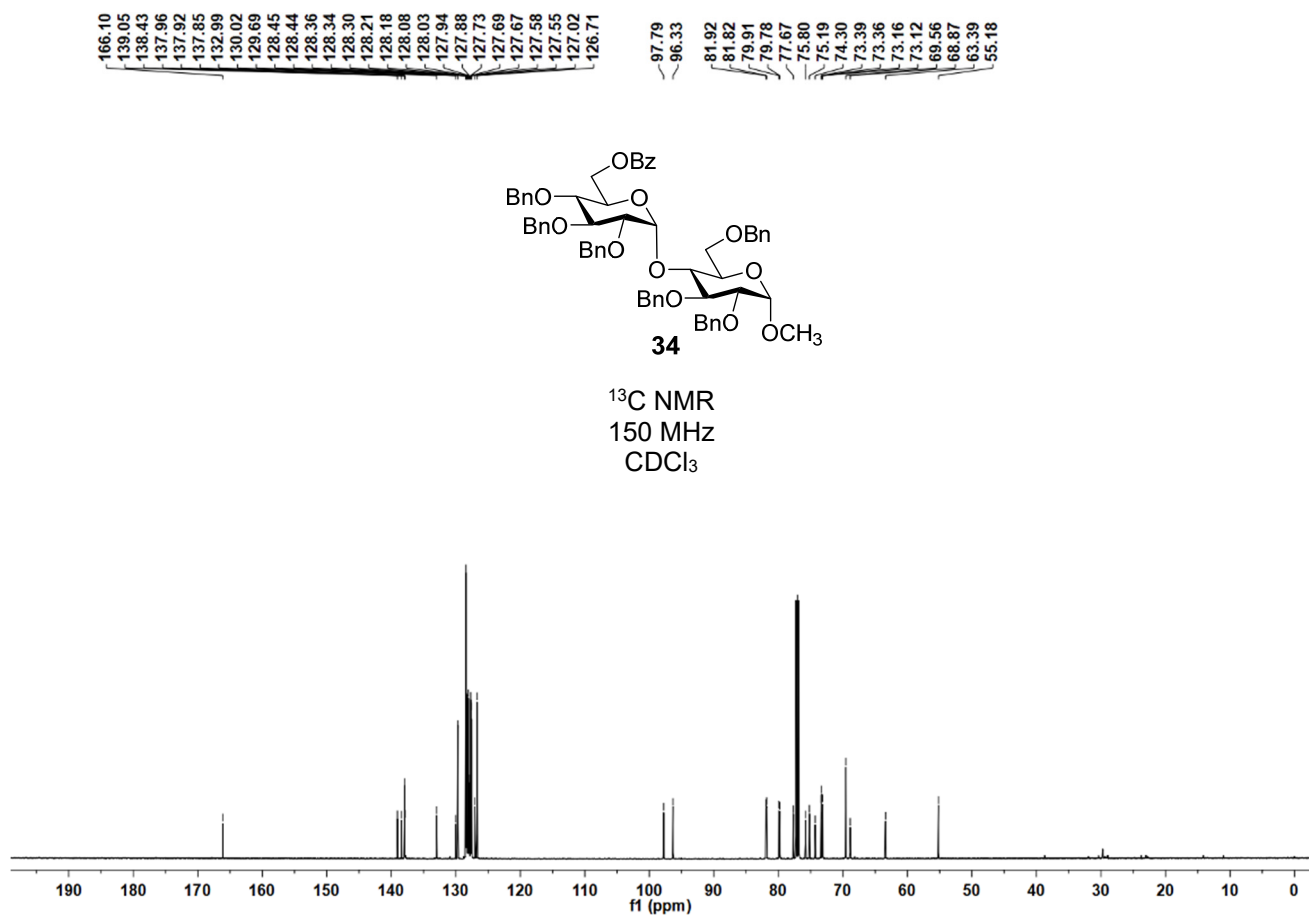

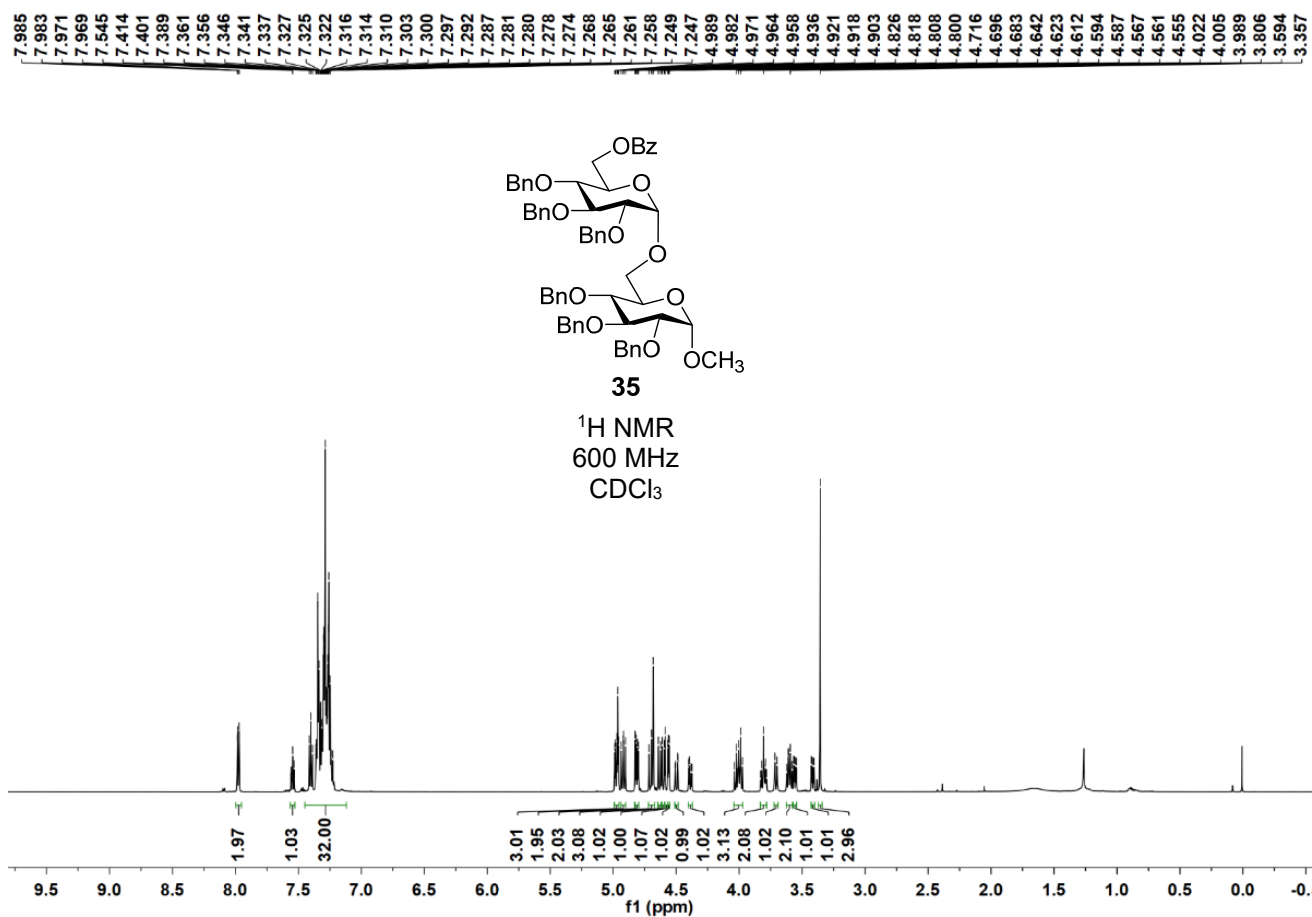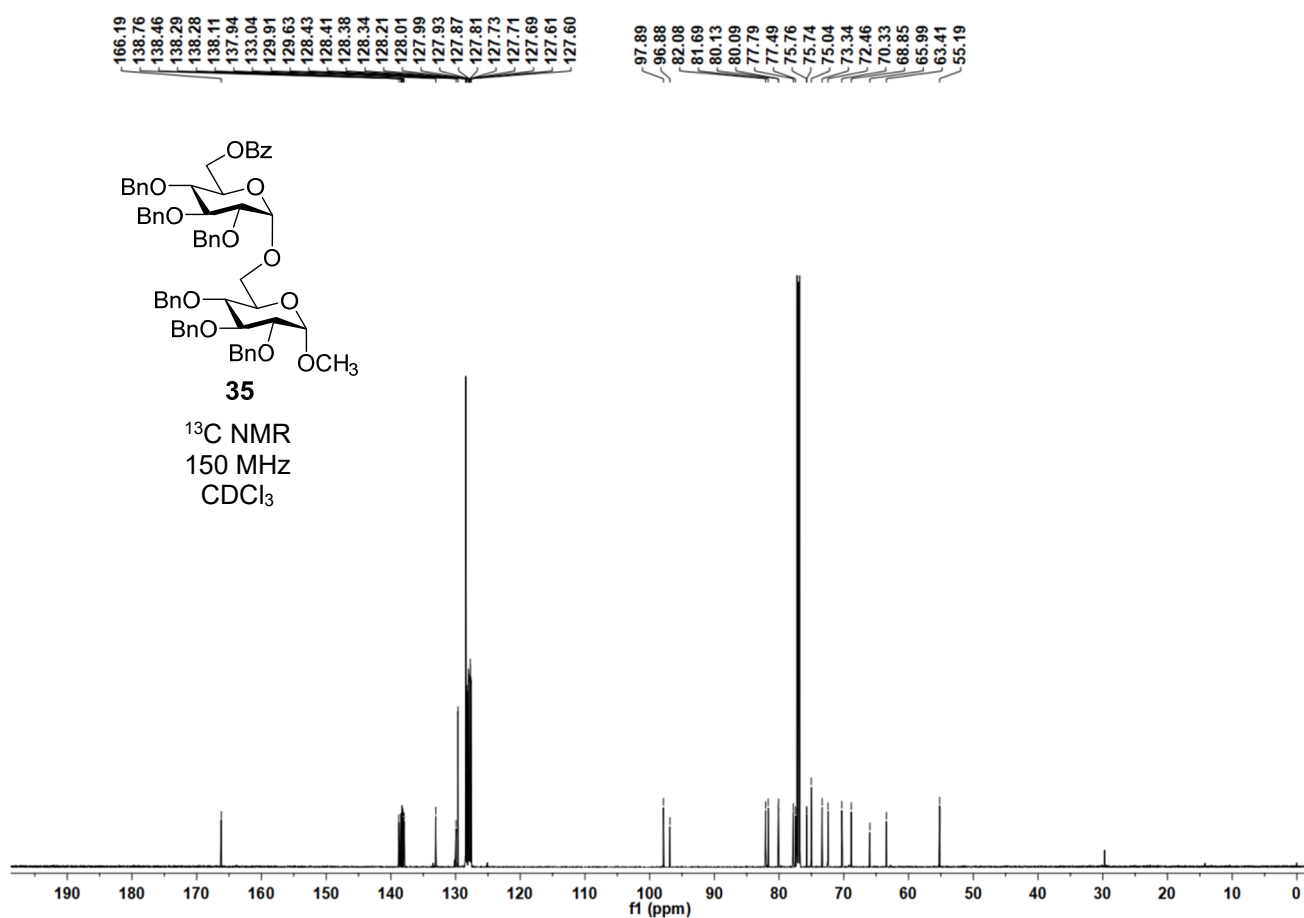

7.937  
7.925  
7.504  
7.491  
7.477  
7.464  
7.388  
7.377  
7.374  
7.363  
7.354  
7.352  
7.346  
7.343  
7.333  
7.329  
7.320  
7.316  
7.308  
7.304  
7.296  
7.285  
7.273  
7.263  
7.259  
7.249  
7.217  
7.205  
7.197  
7.190  
7.186  
7.177  
7.174  
7.161  
7.149  
7.082  
7.070  
7.057  
6.992  
6.980  
5.614  
5.608  
5.482  
5.077  
5.060  
4.931  
4.913  
4.885  
4.867  
4.745  
4.729  
4.718  
4.702  
4.619  
4.599  
4.532  
4.514  
4.344  
4.324  
4.196  
4.179  
4.176  
4.059  
3.863  
3.812  
3.613  
3.574  
3.494  
2.400

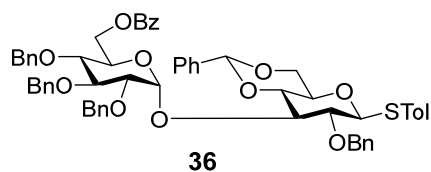

<sup>1</sup>H NMR  
600 MHz  
CDCl<sub>3</sub>

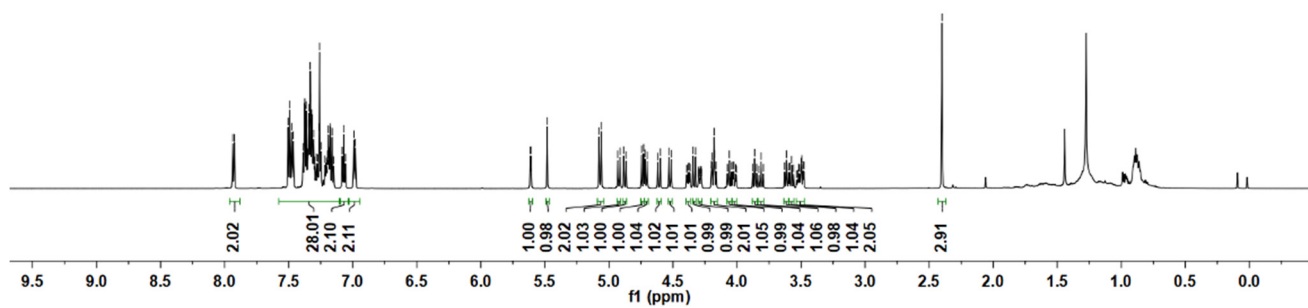

166.09  
136.55  
138.32  
138.16  
137.54  
137.09  
136.85  
132.85  
132.82  
129.95  
129.93  
129.72  
129.50  
129.22  
128.66  
128.48  
128.43  
128.34  
128.26  
128.18  
128.11  
128.06  
127.94  
127.74  
127.71  
127.58  
127.51  
126.47  
102.31  
95.88  
89.10  
82.07  
81.74  
78.73  
77.58  
76.93  
75.92  
75.88  
75.35  
71.13  
69.88  
68.86  
68.68  
63.00  
21.21

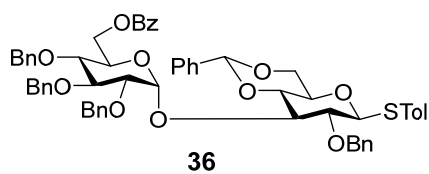

<sup>13</sup>C NMR  
150 MHz  
CDCl<sub>3</sub>

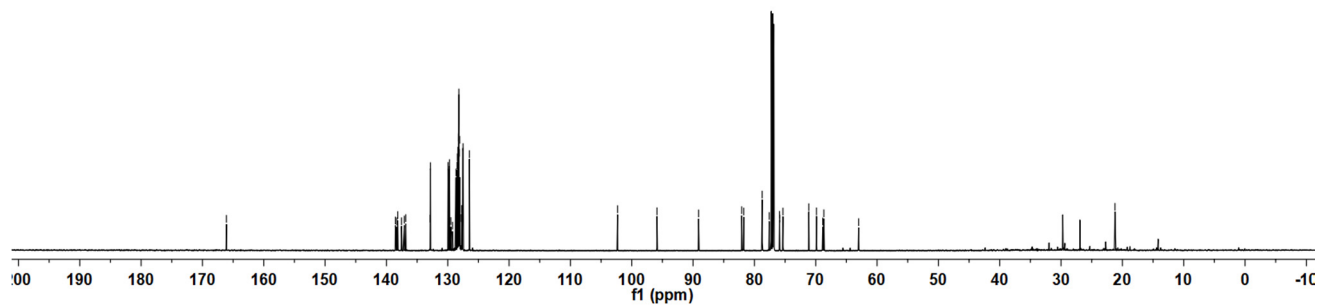

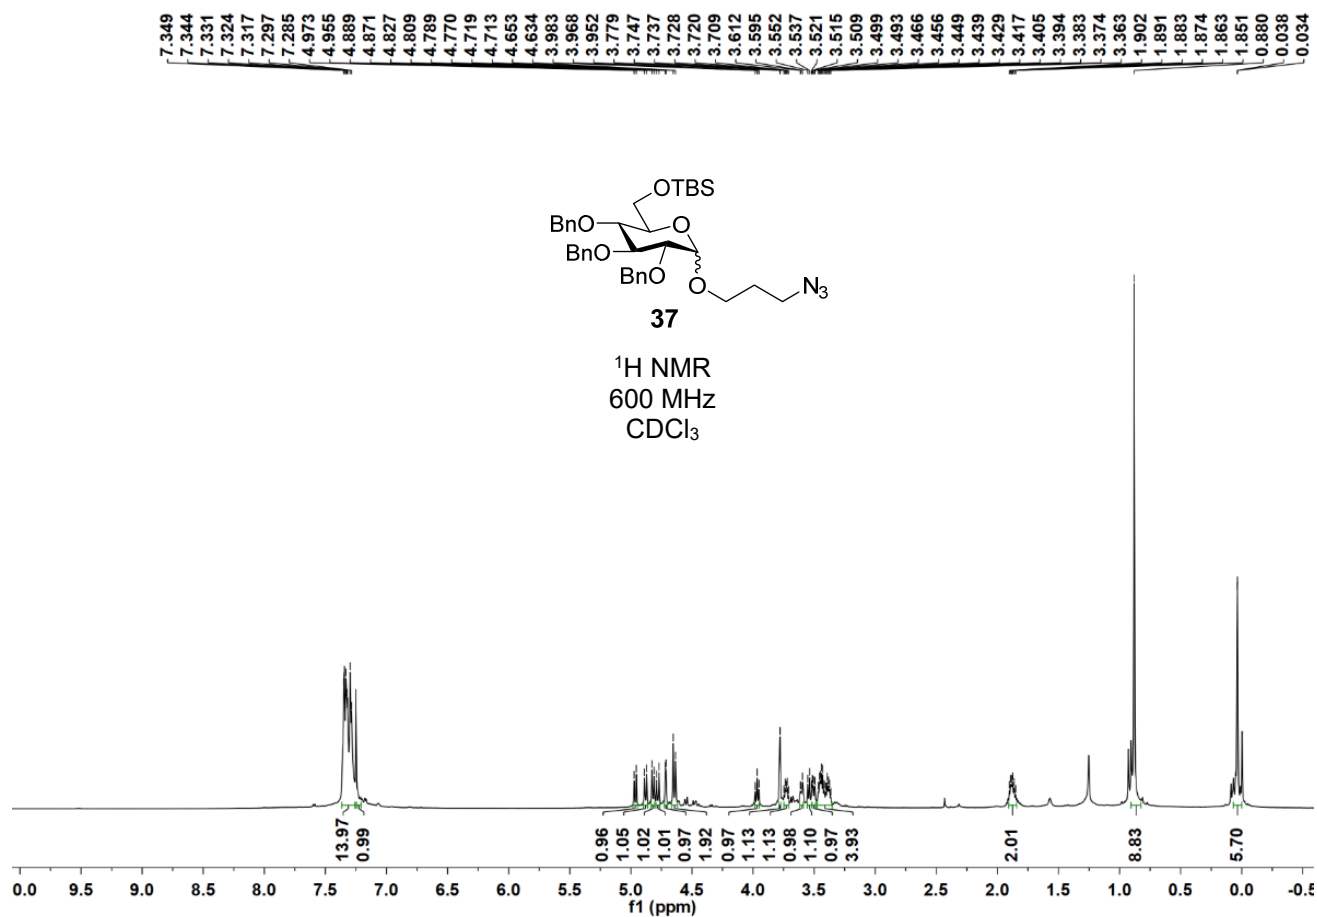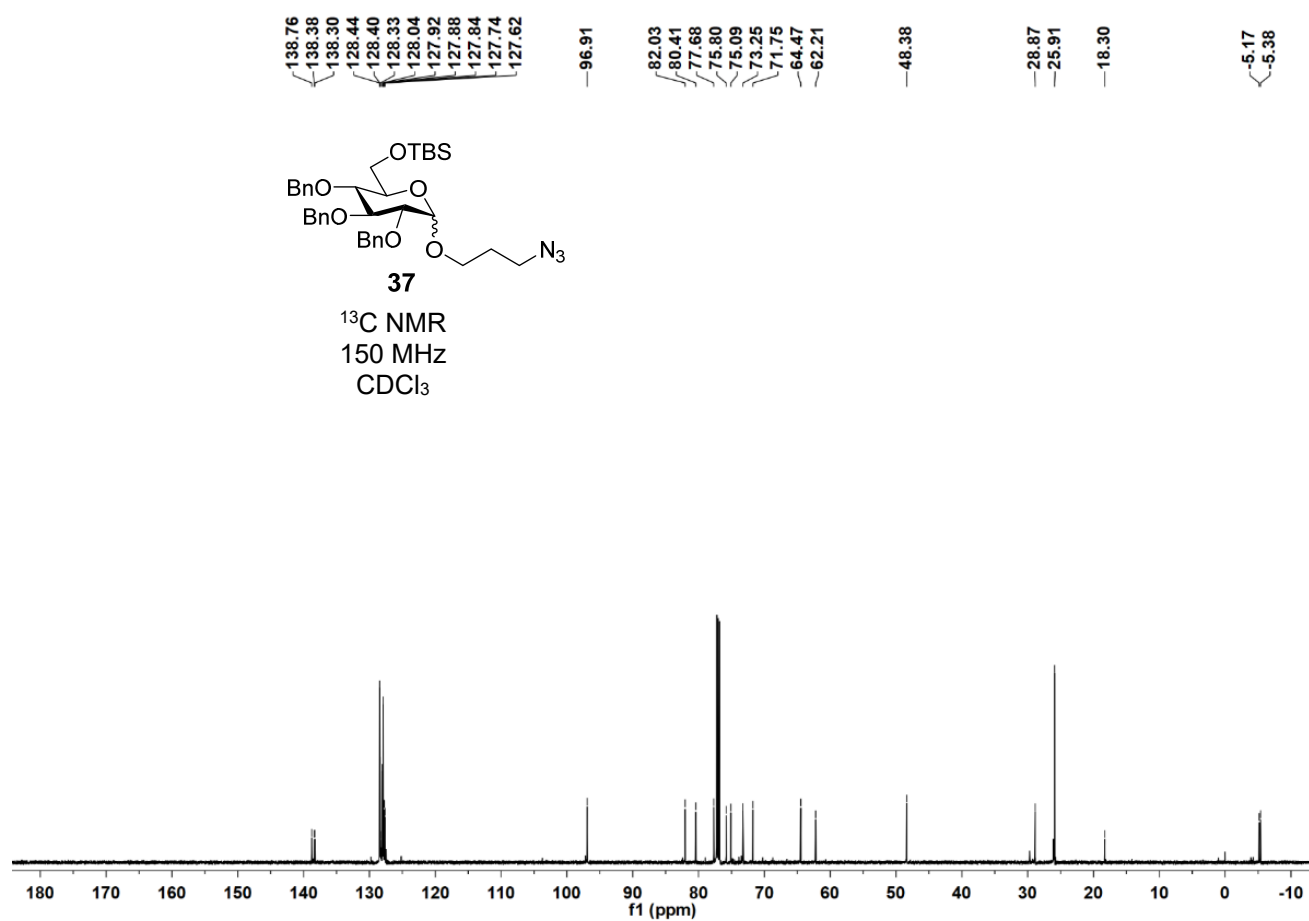

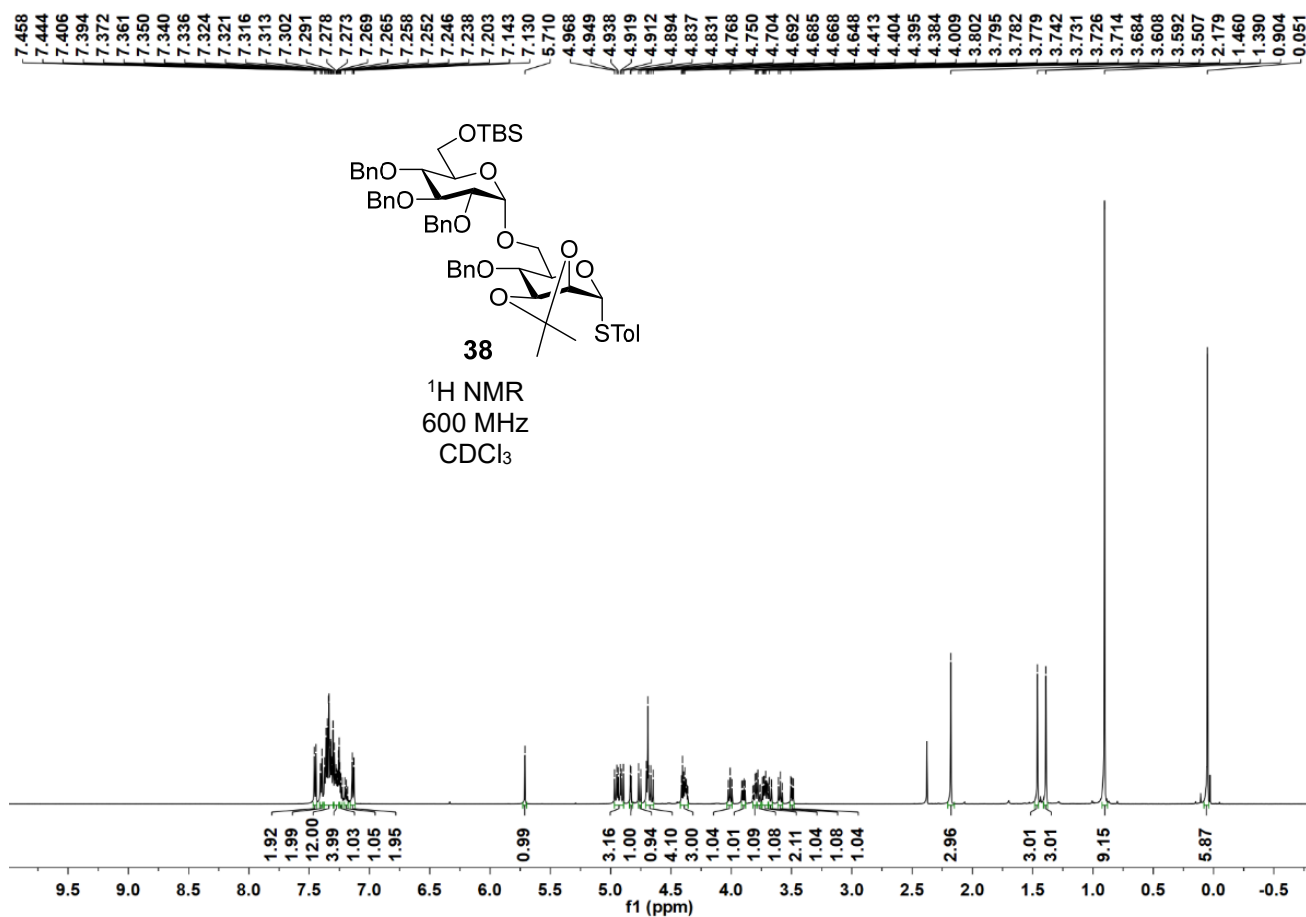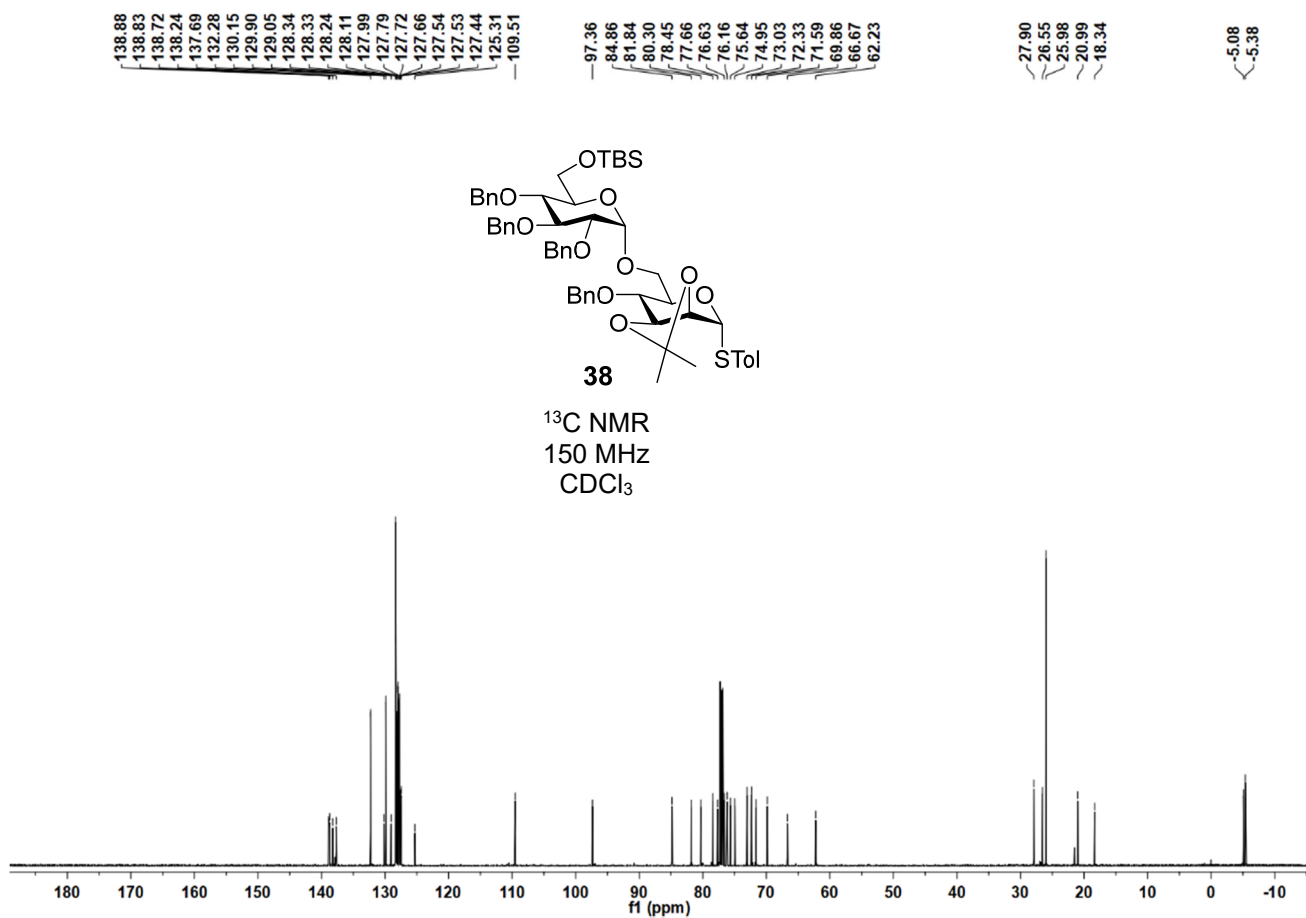

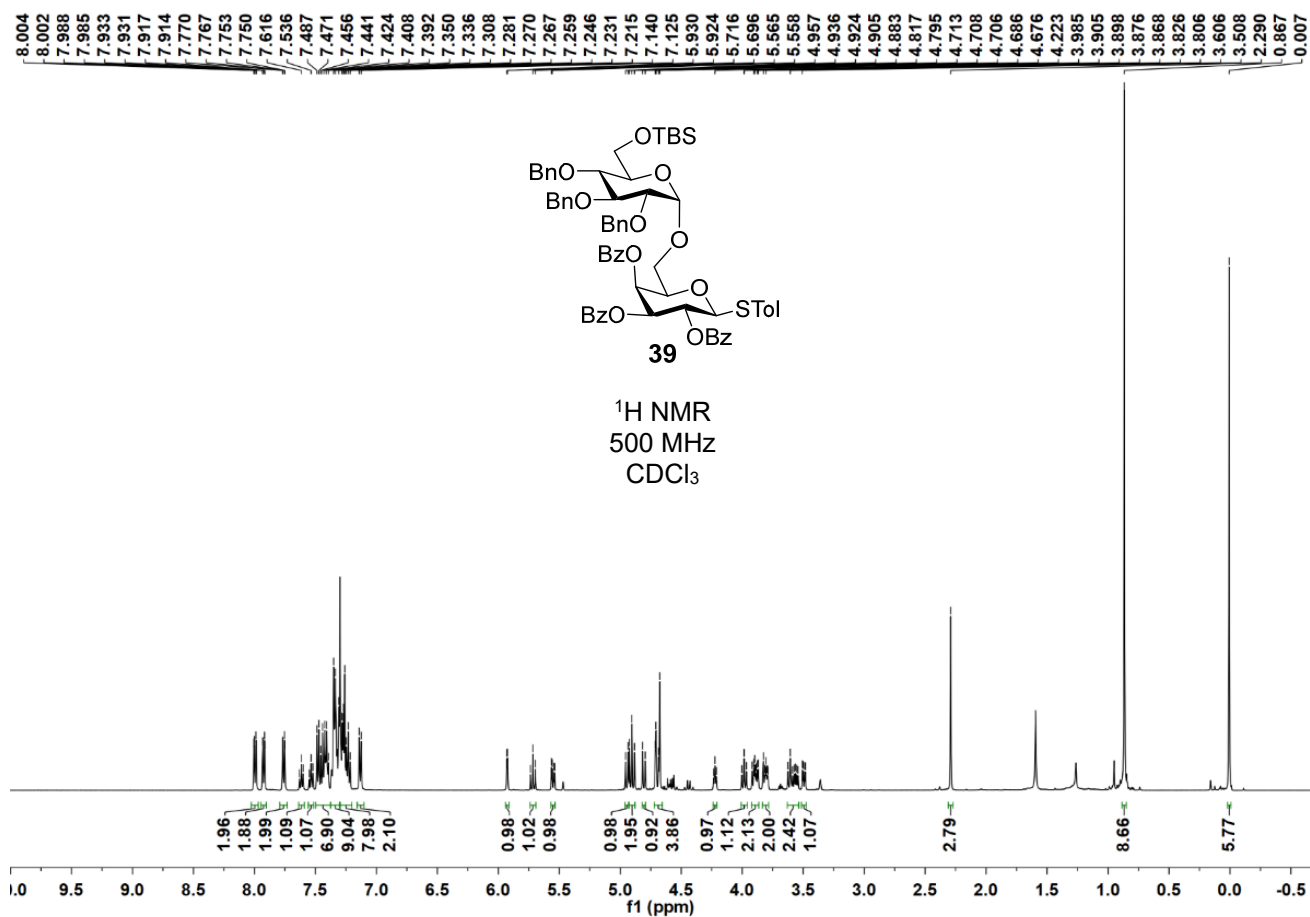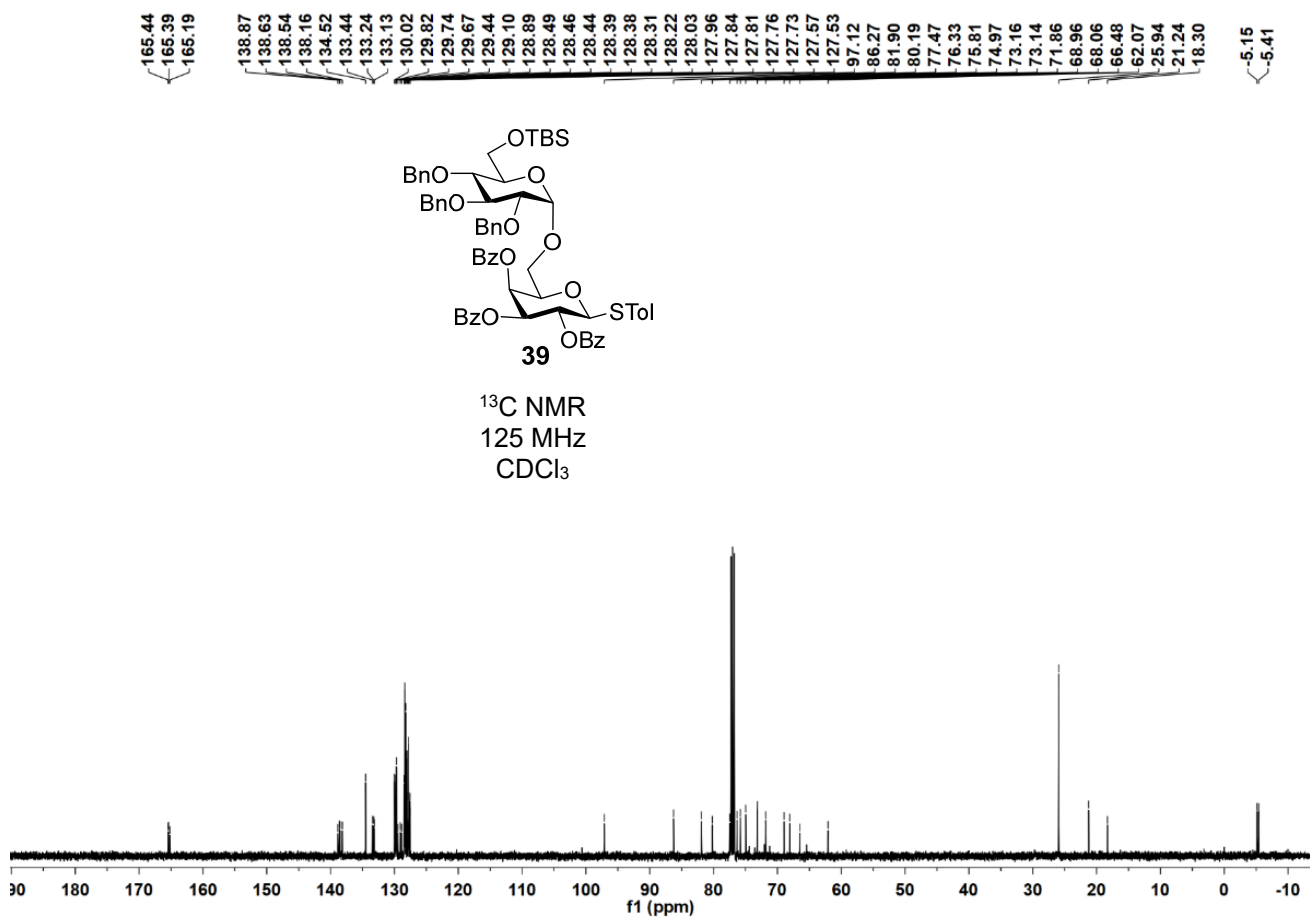

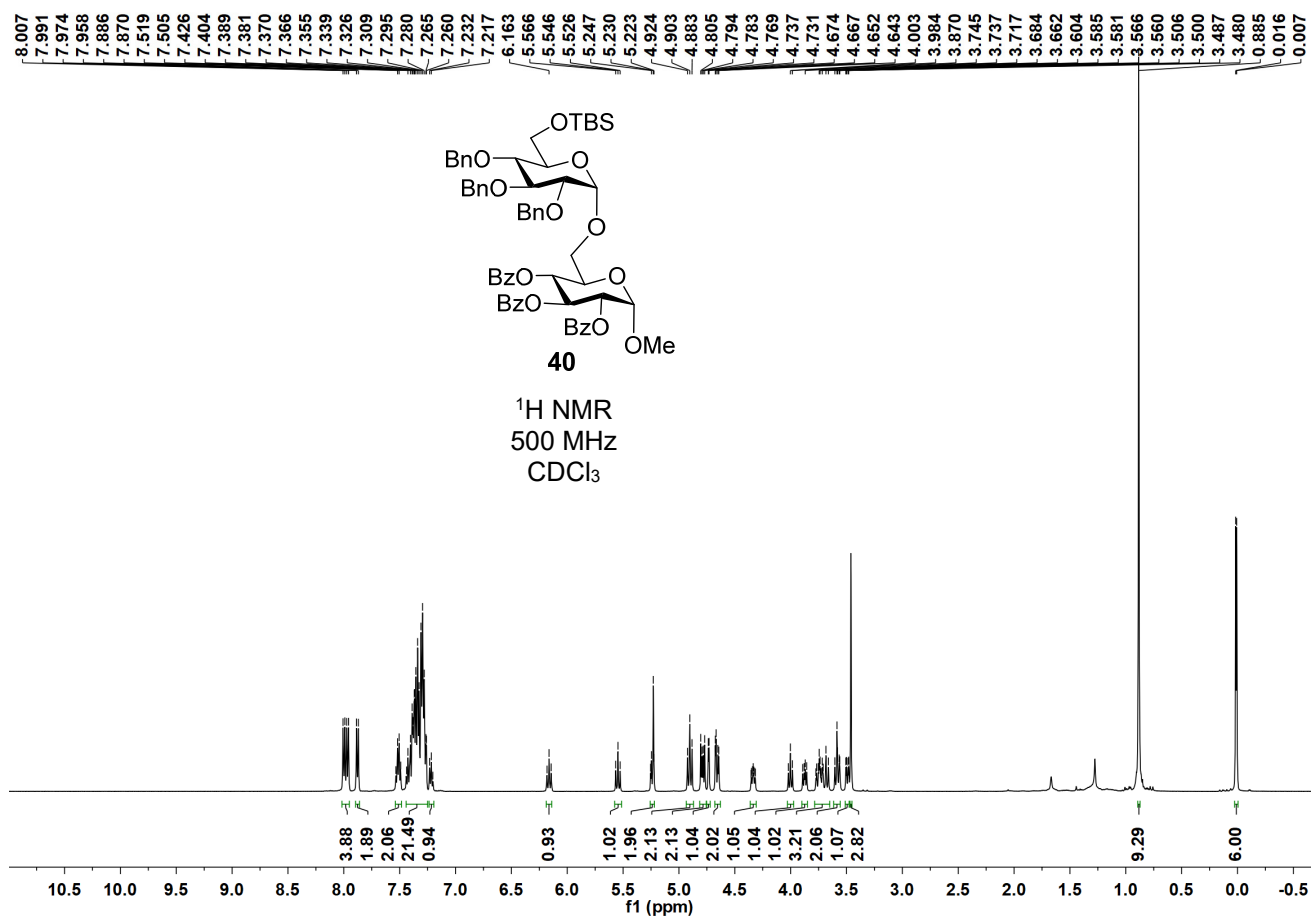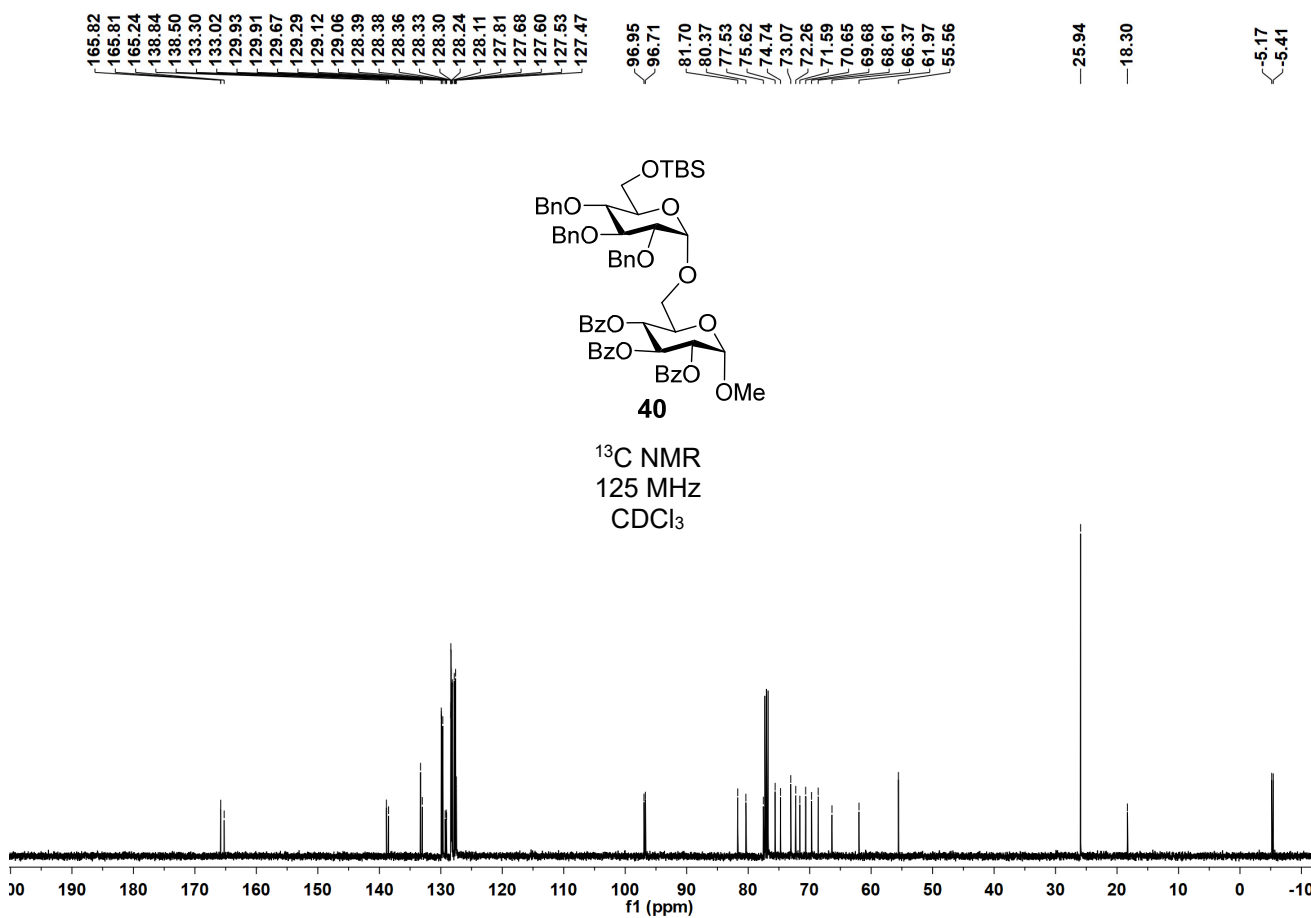



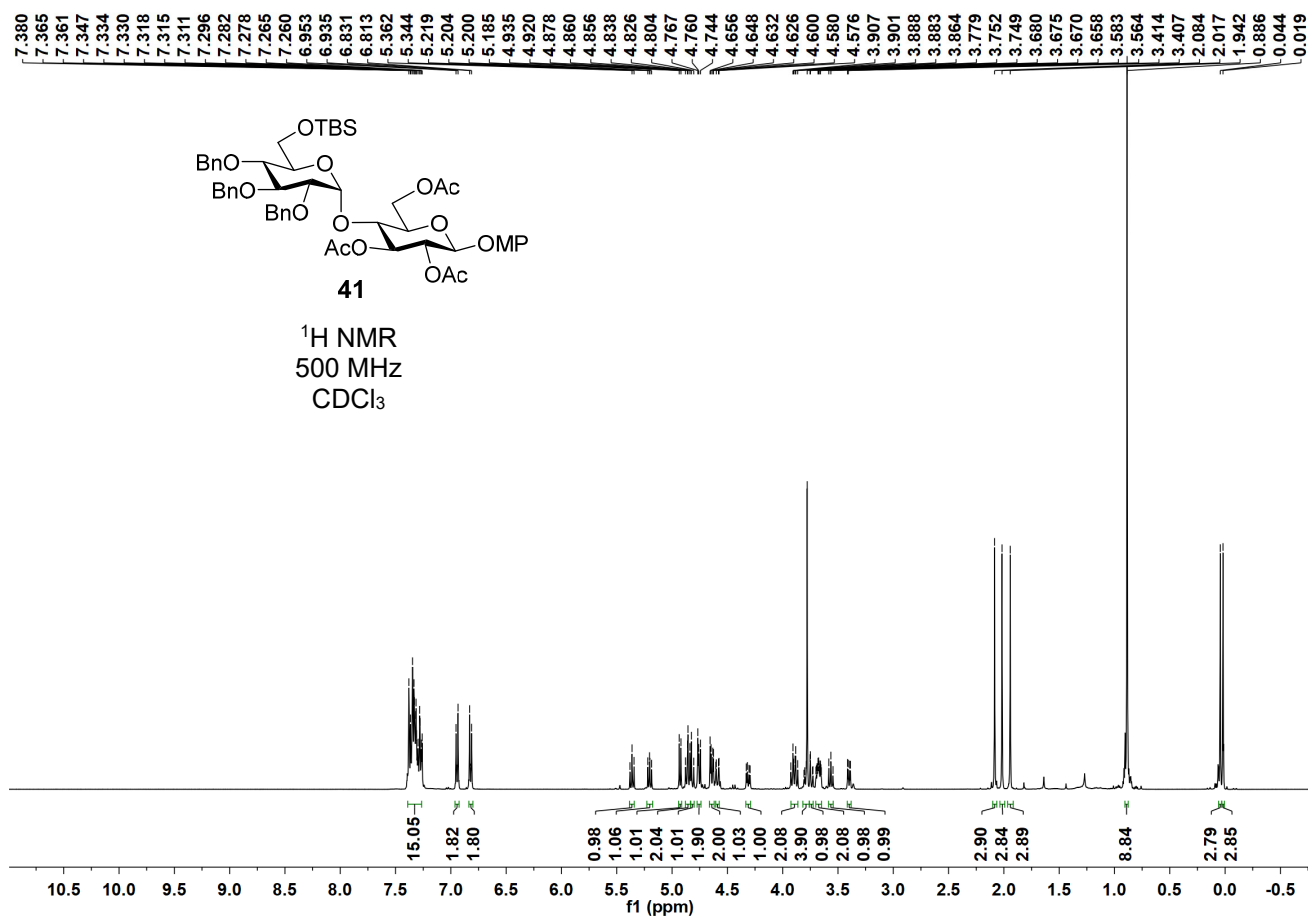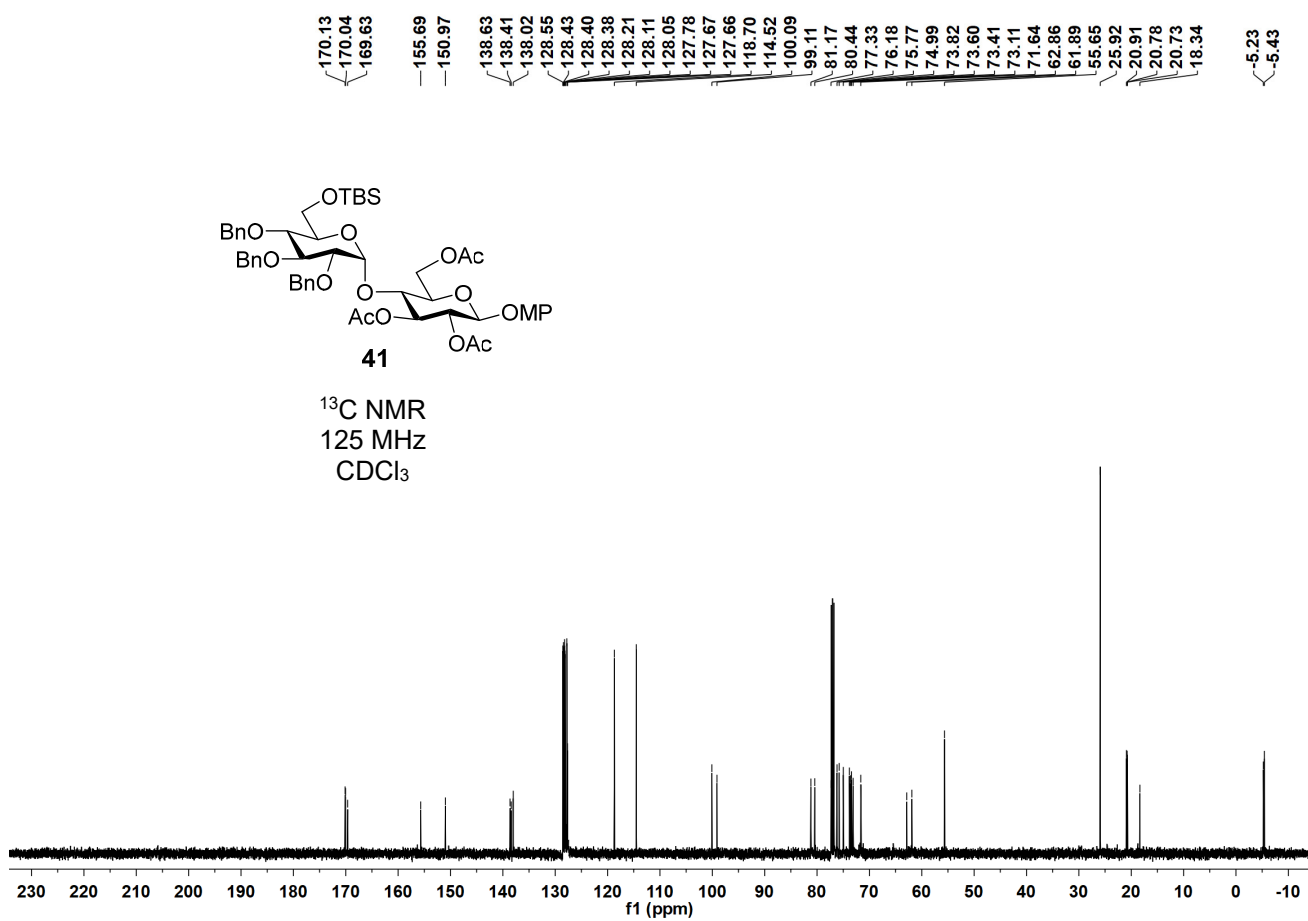

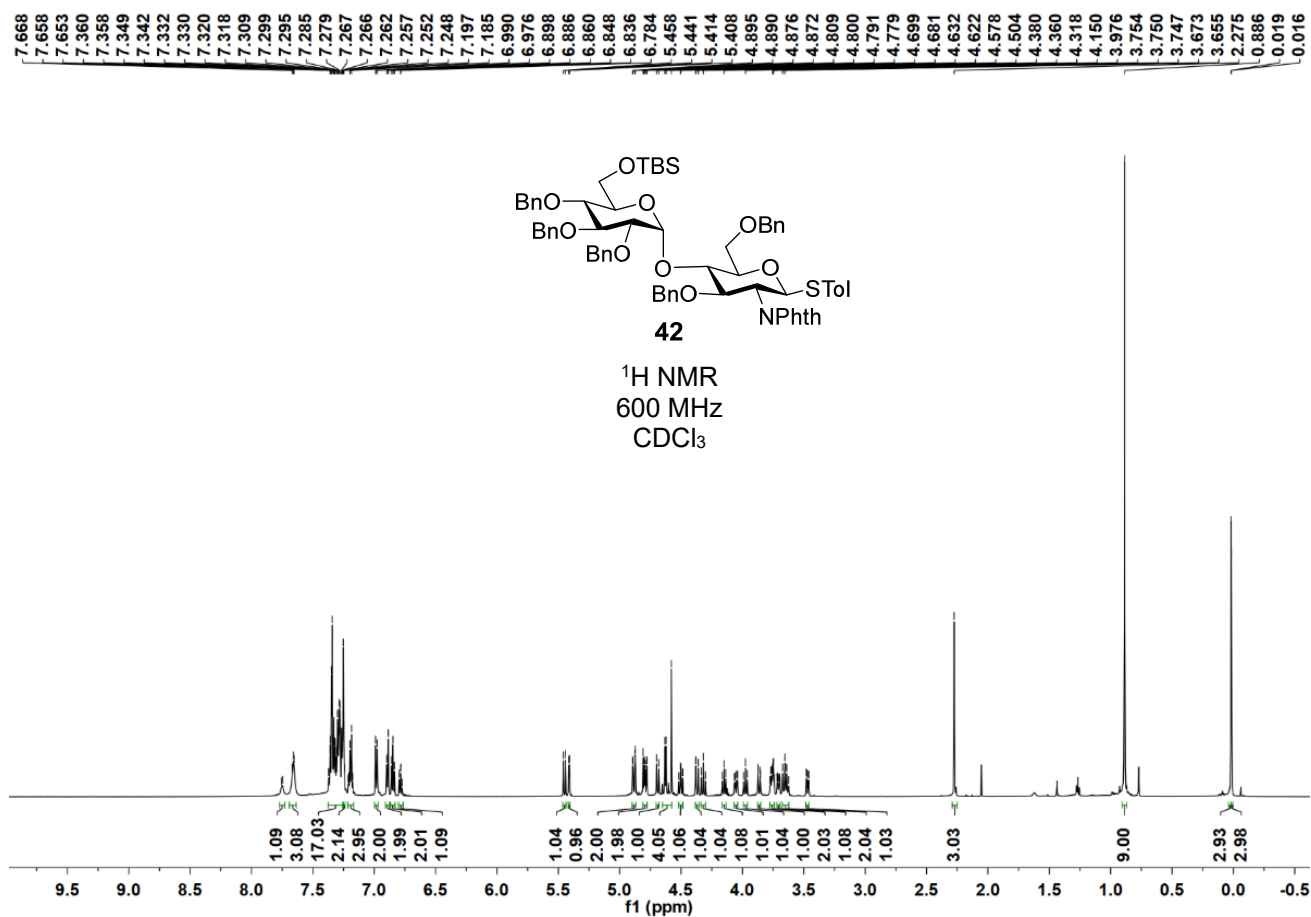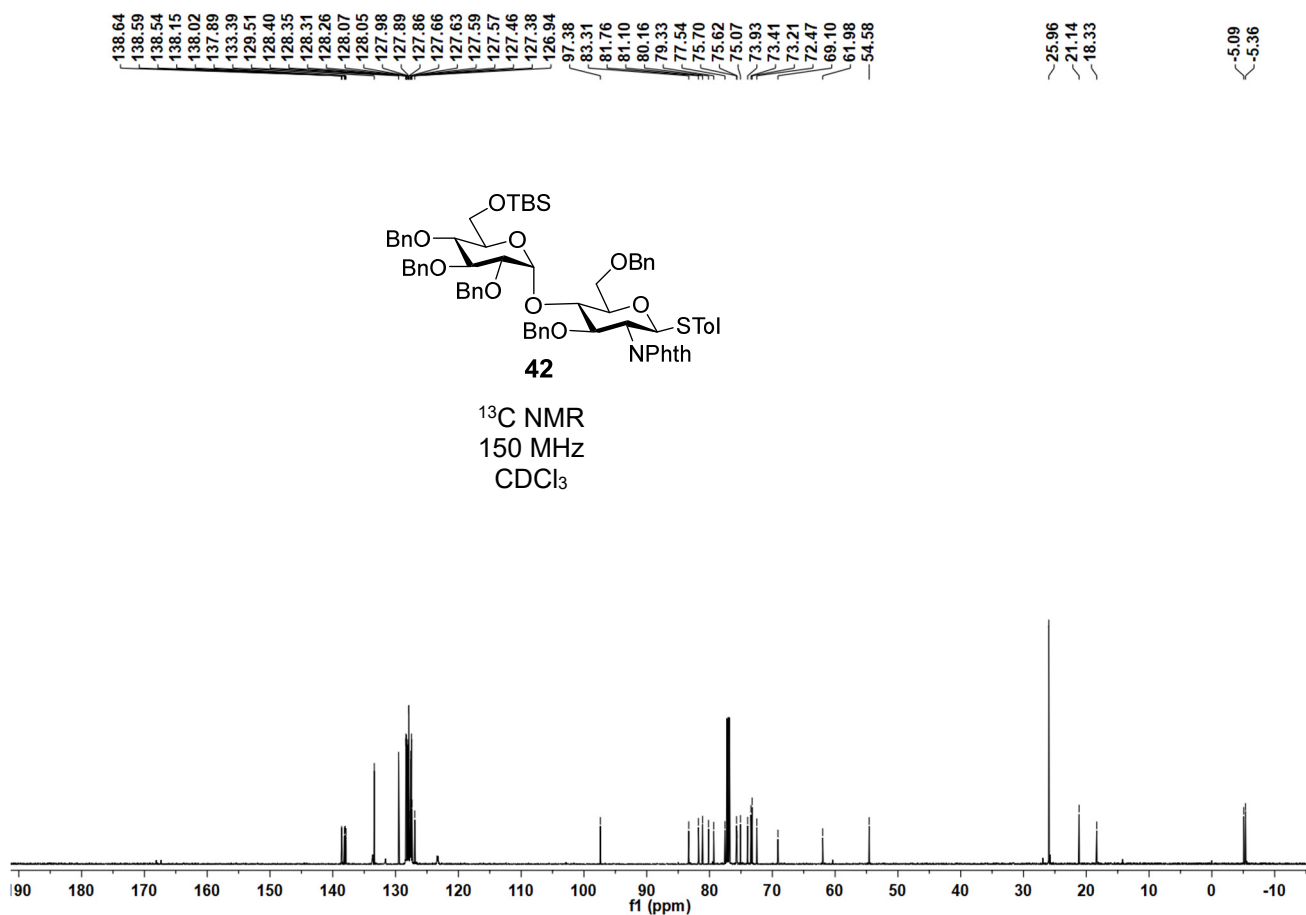

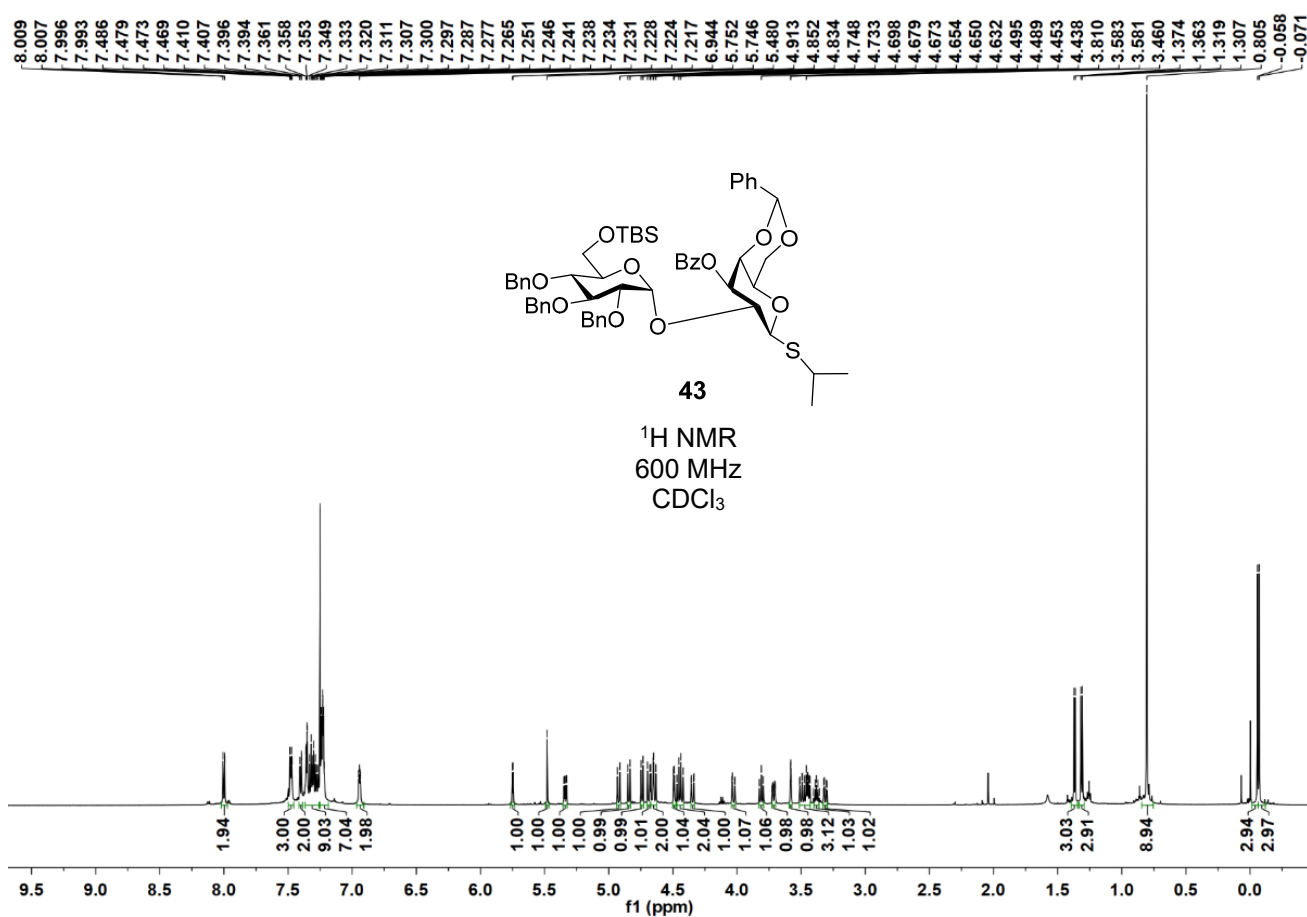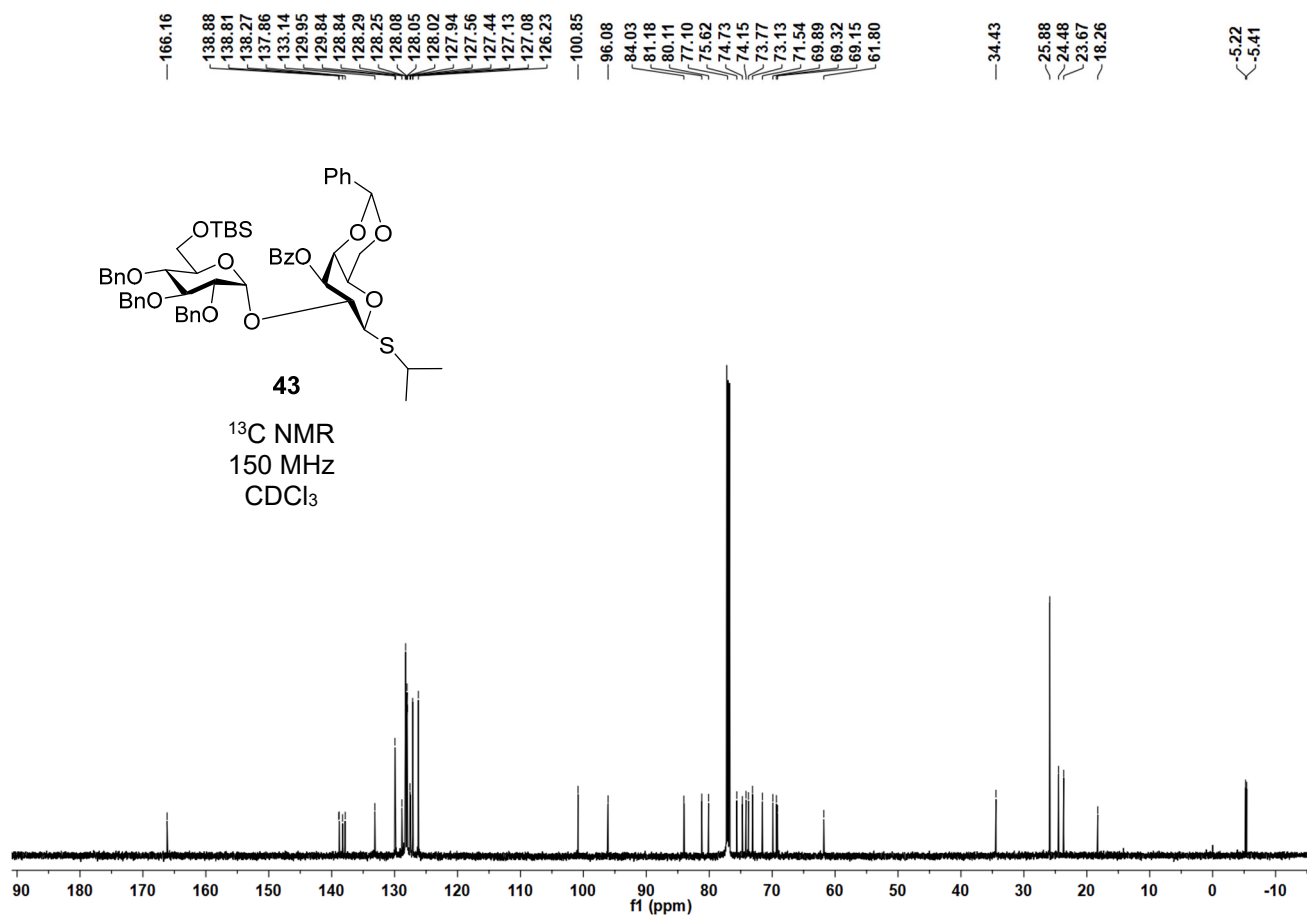

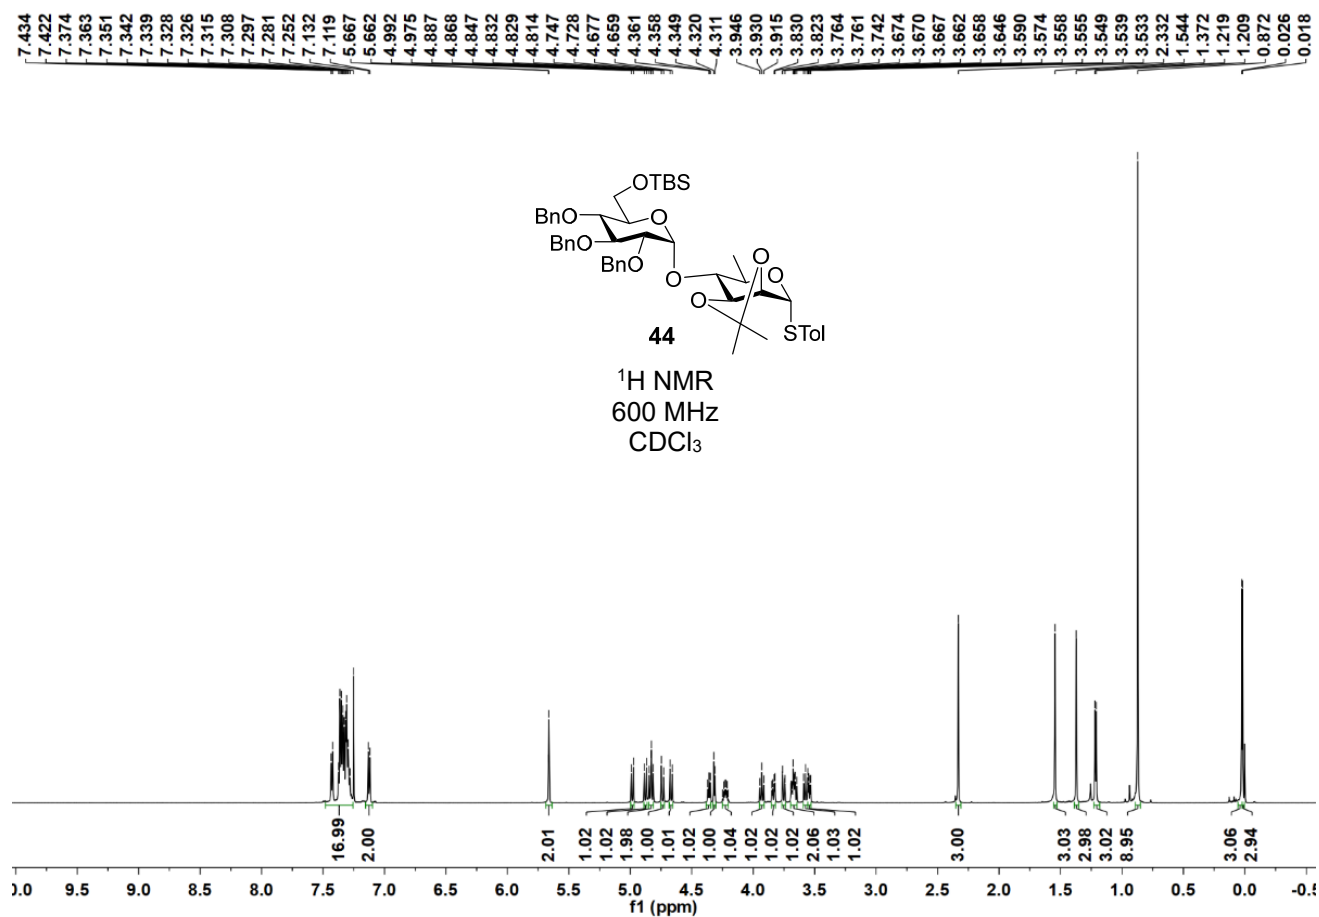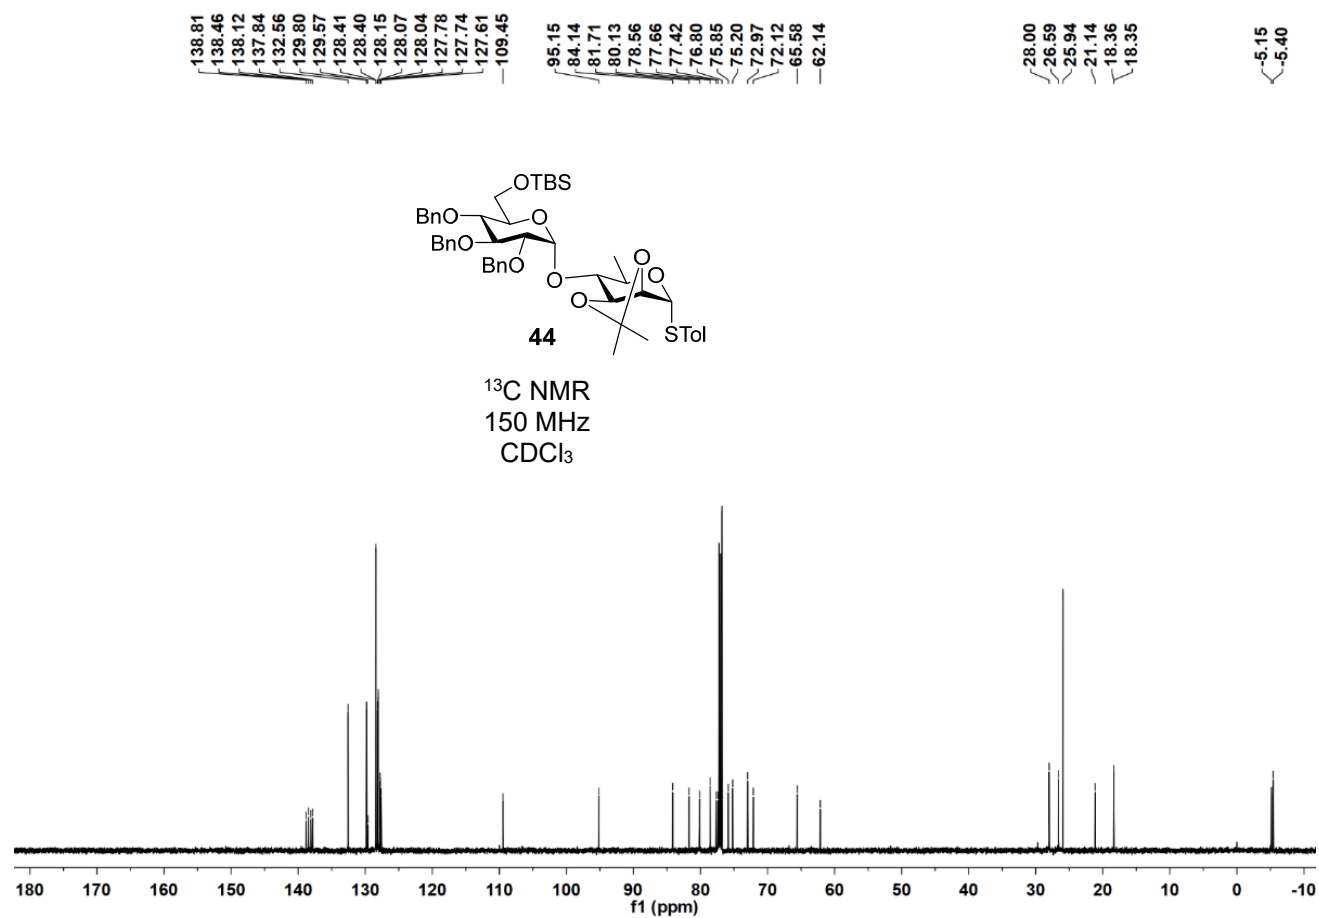

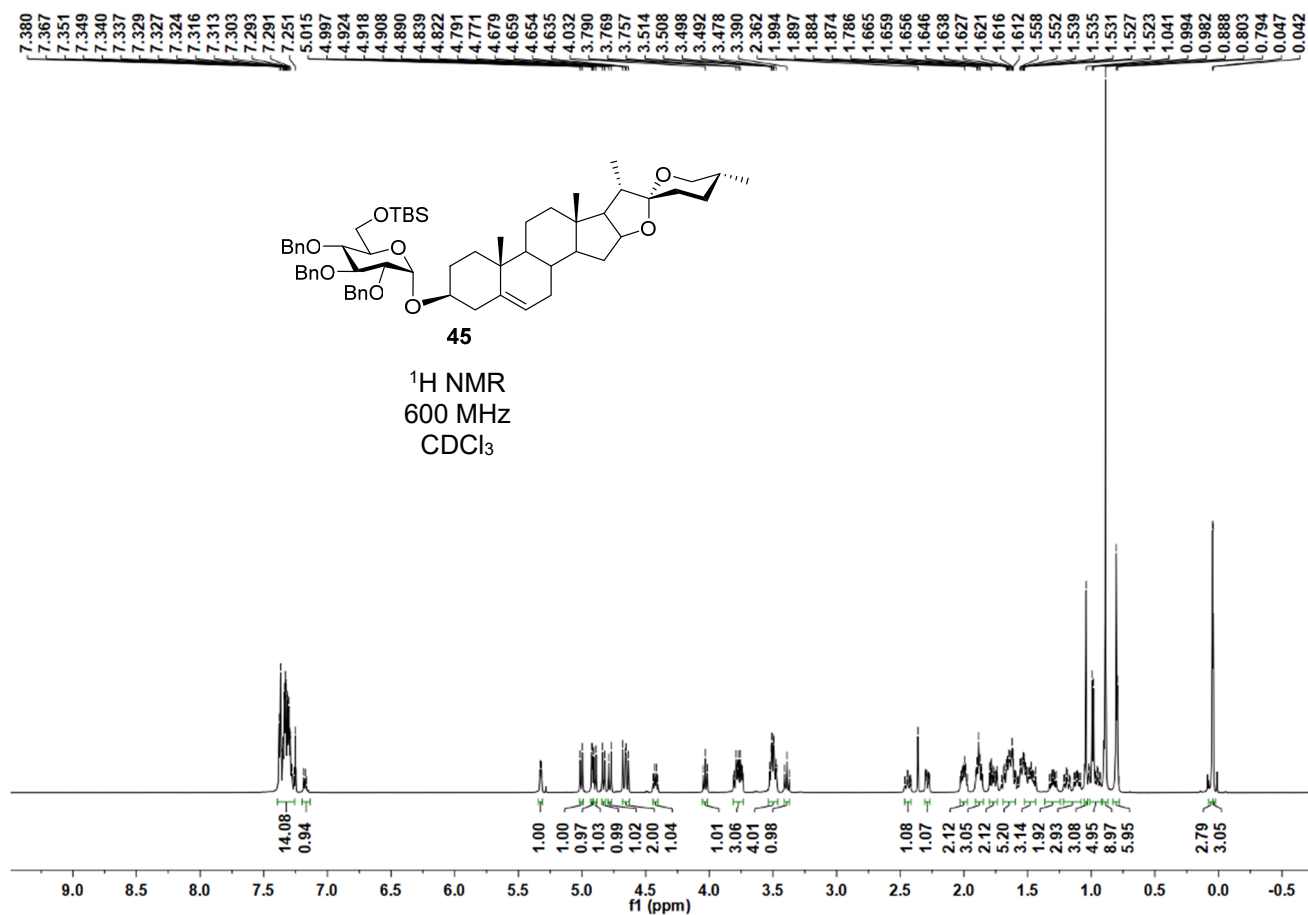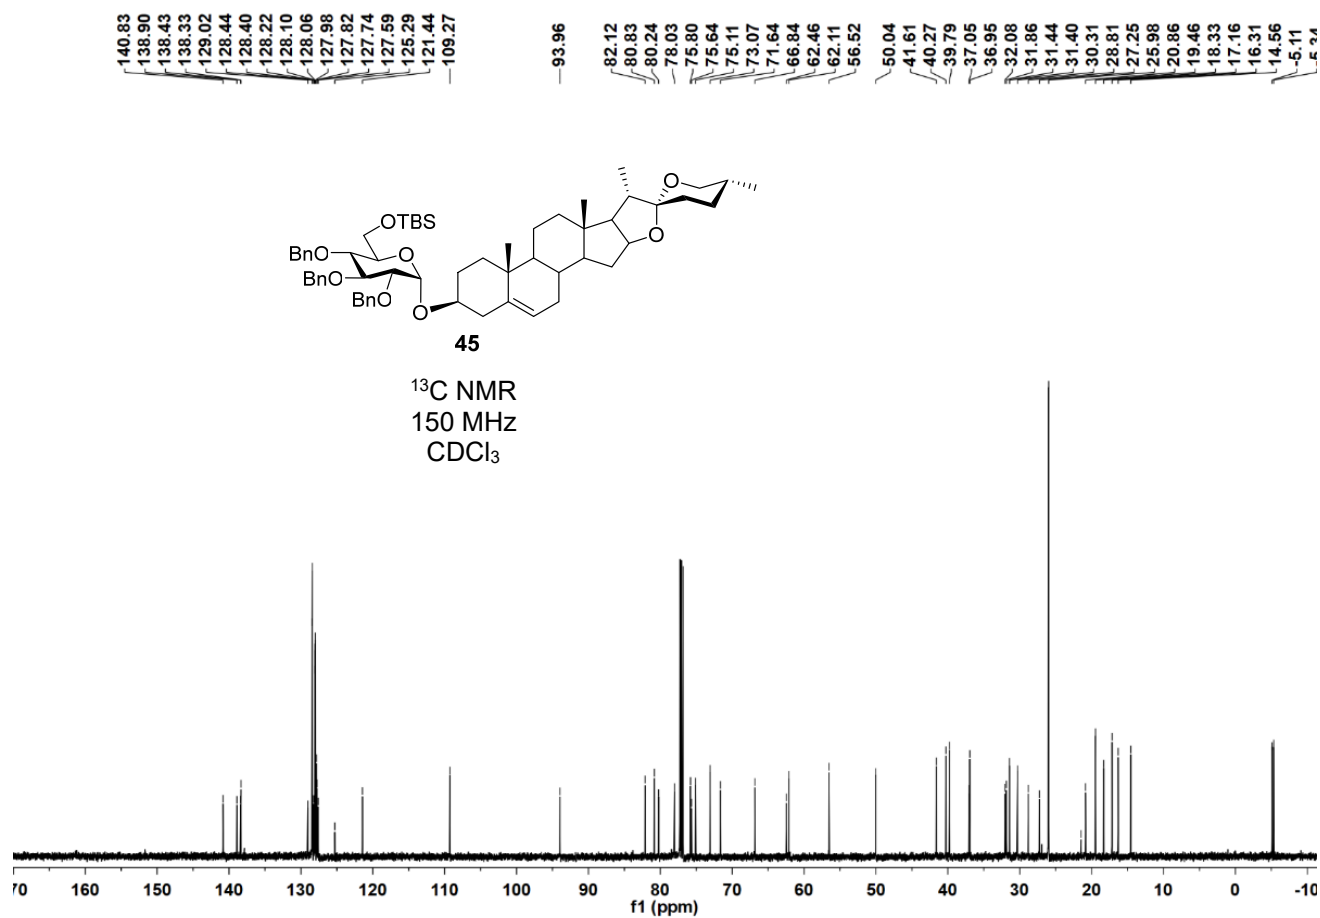

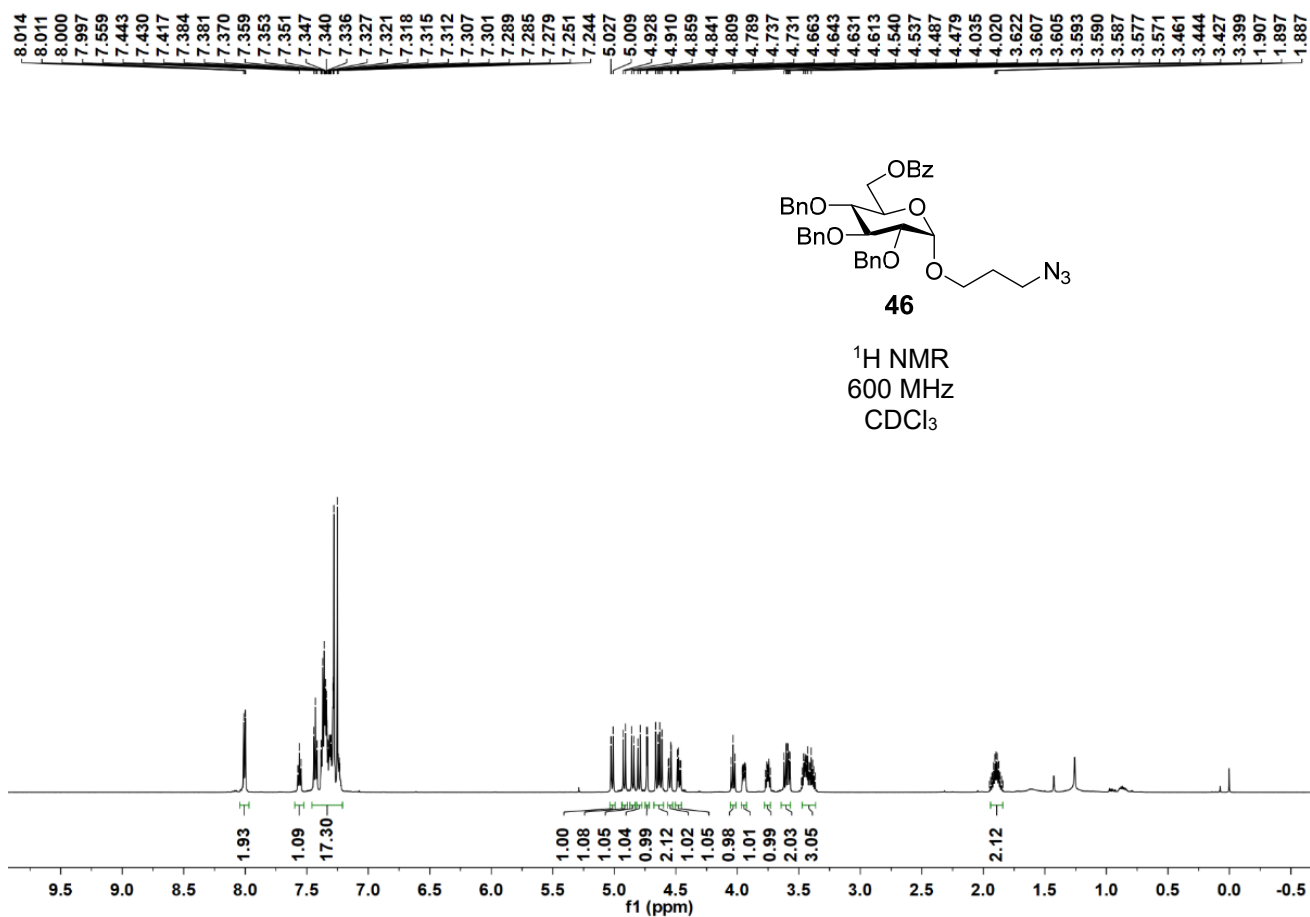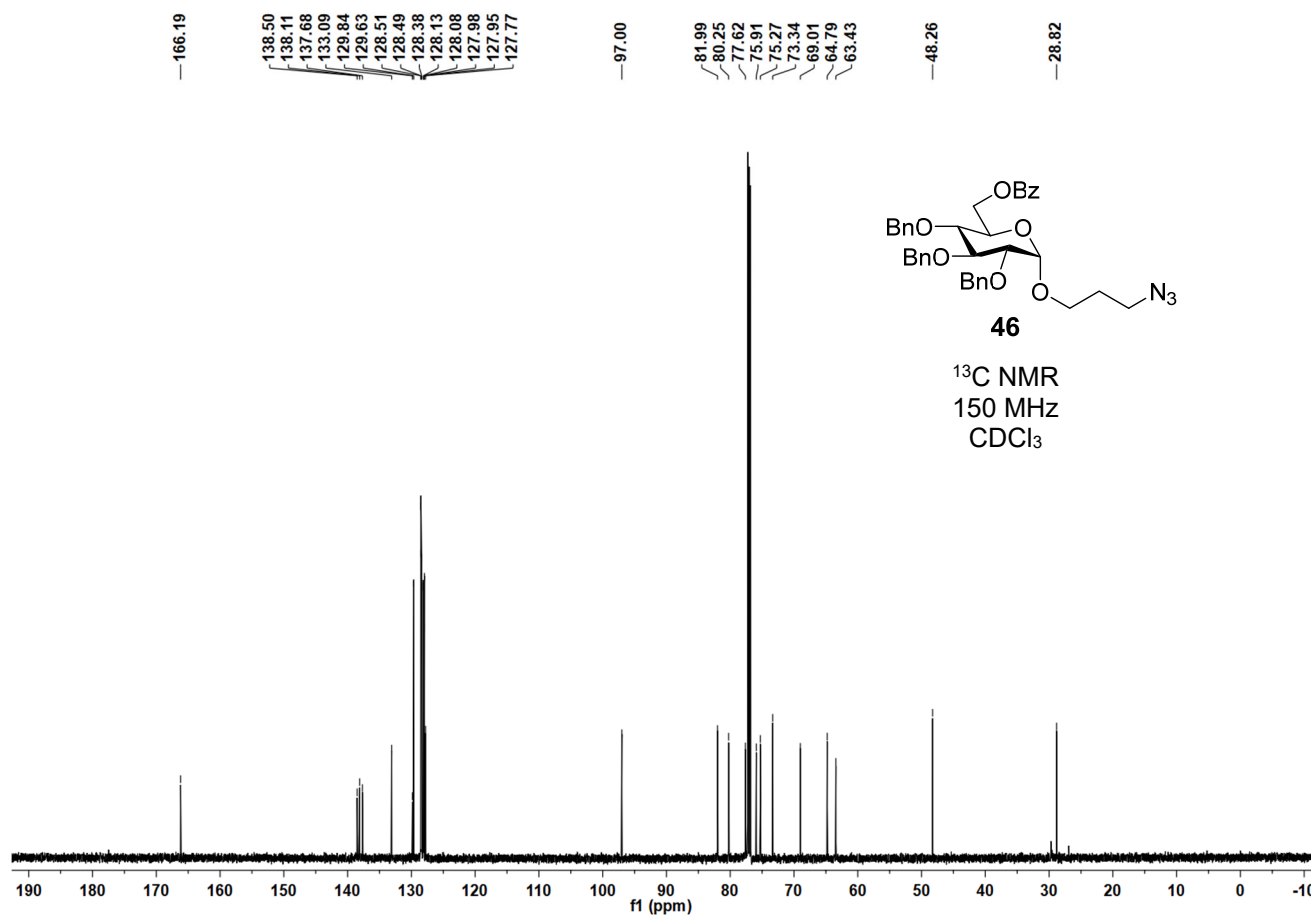

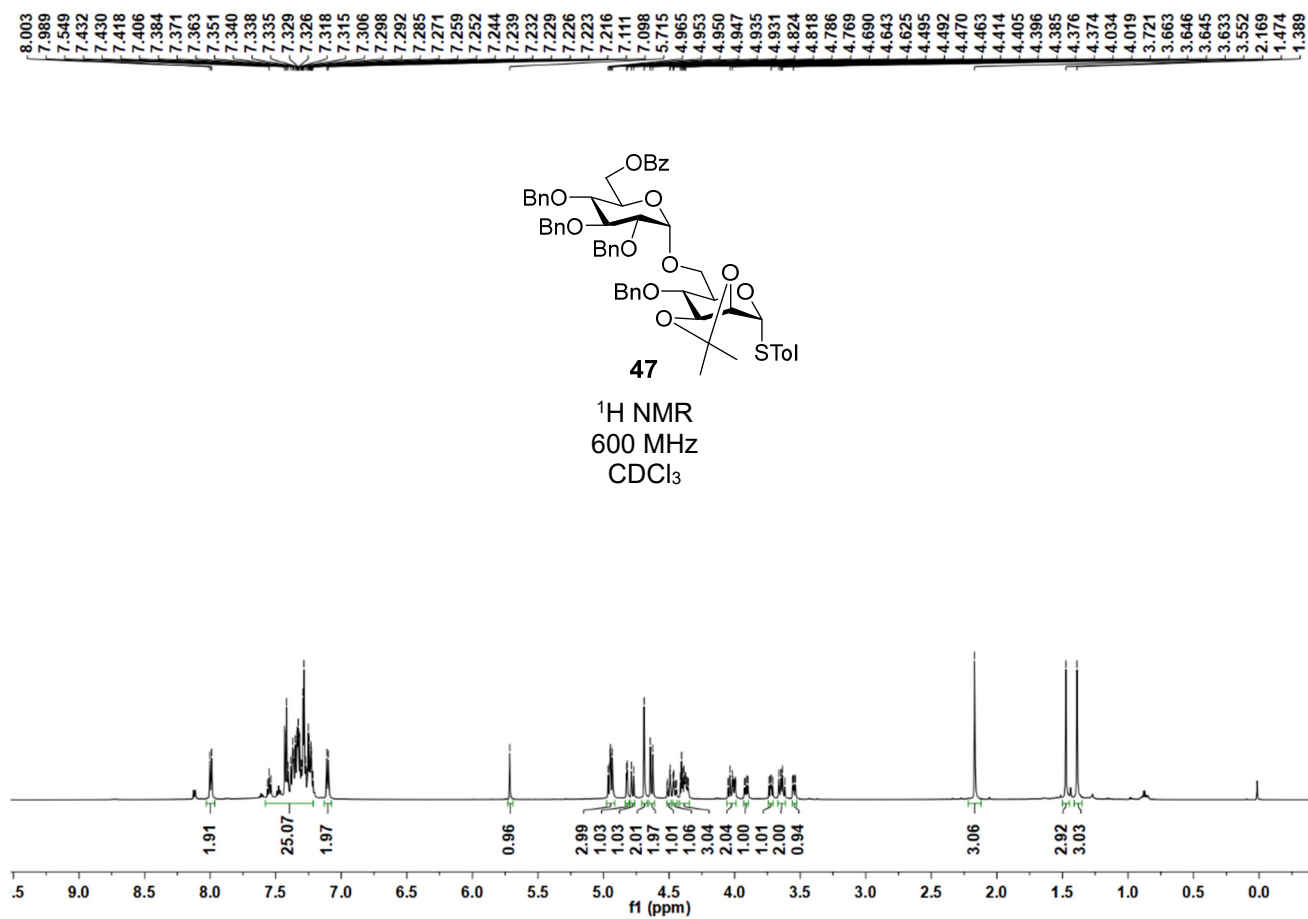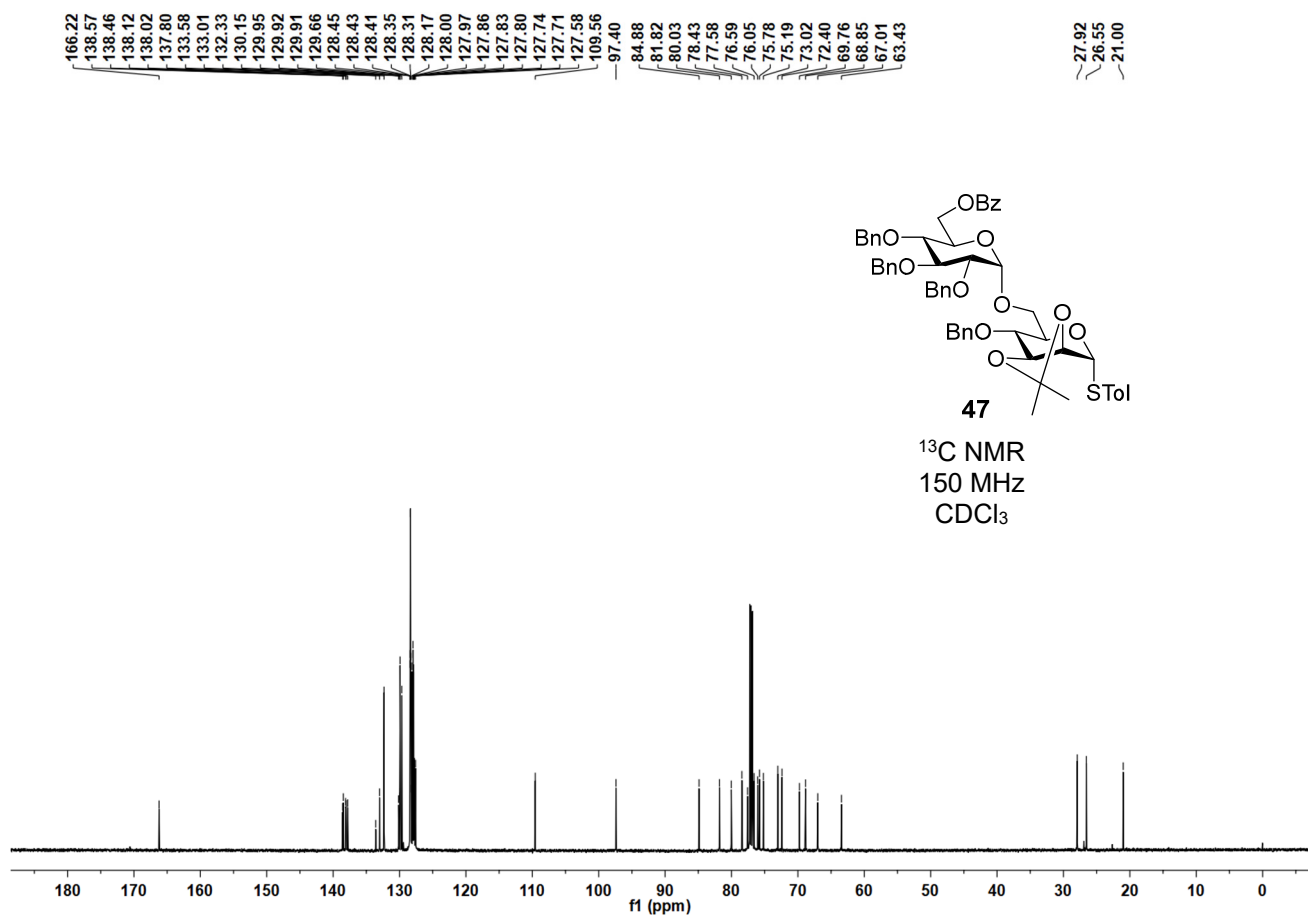

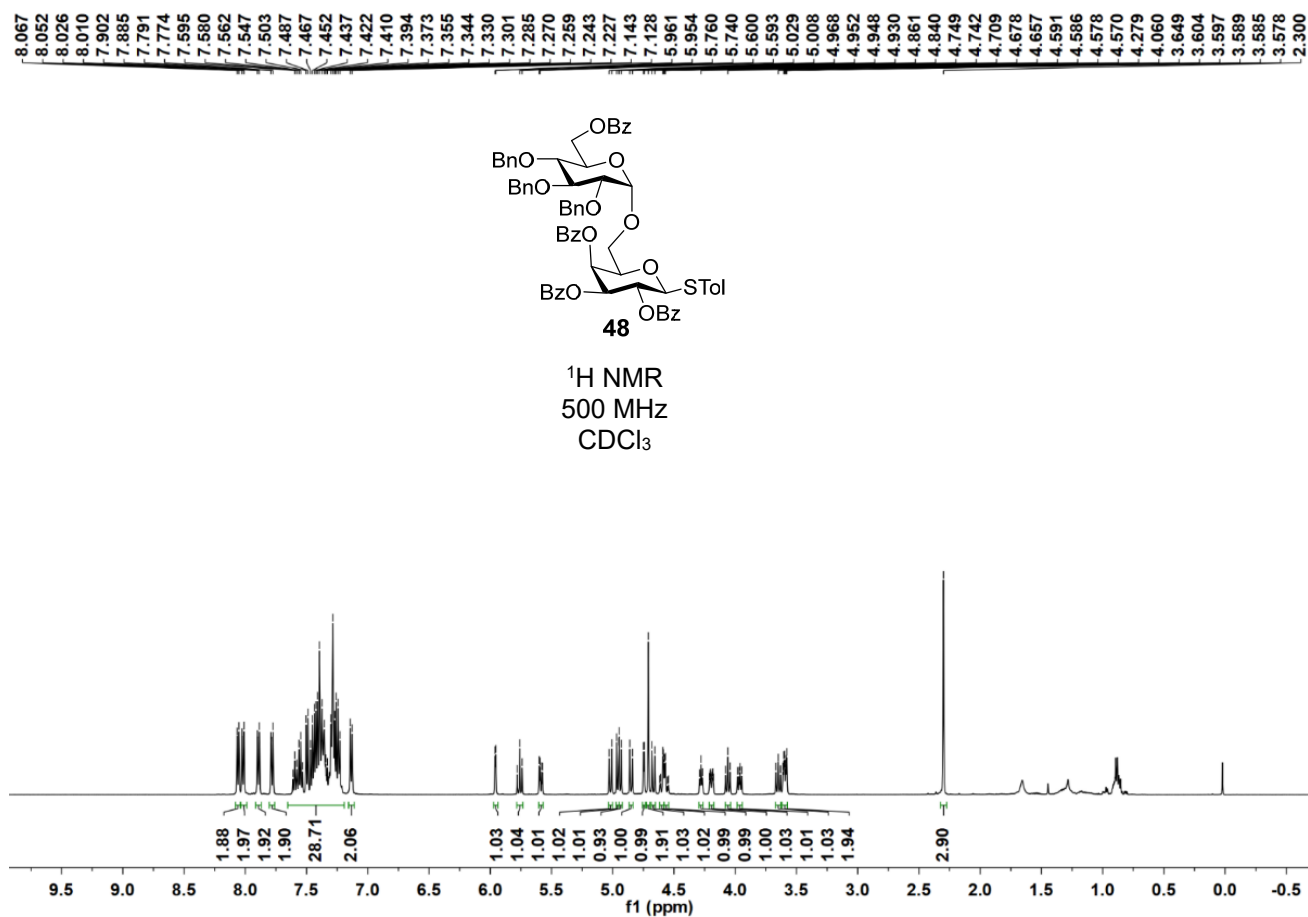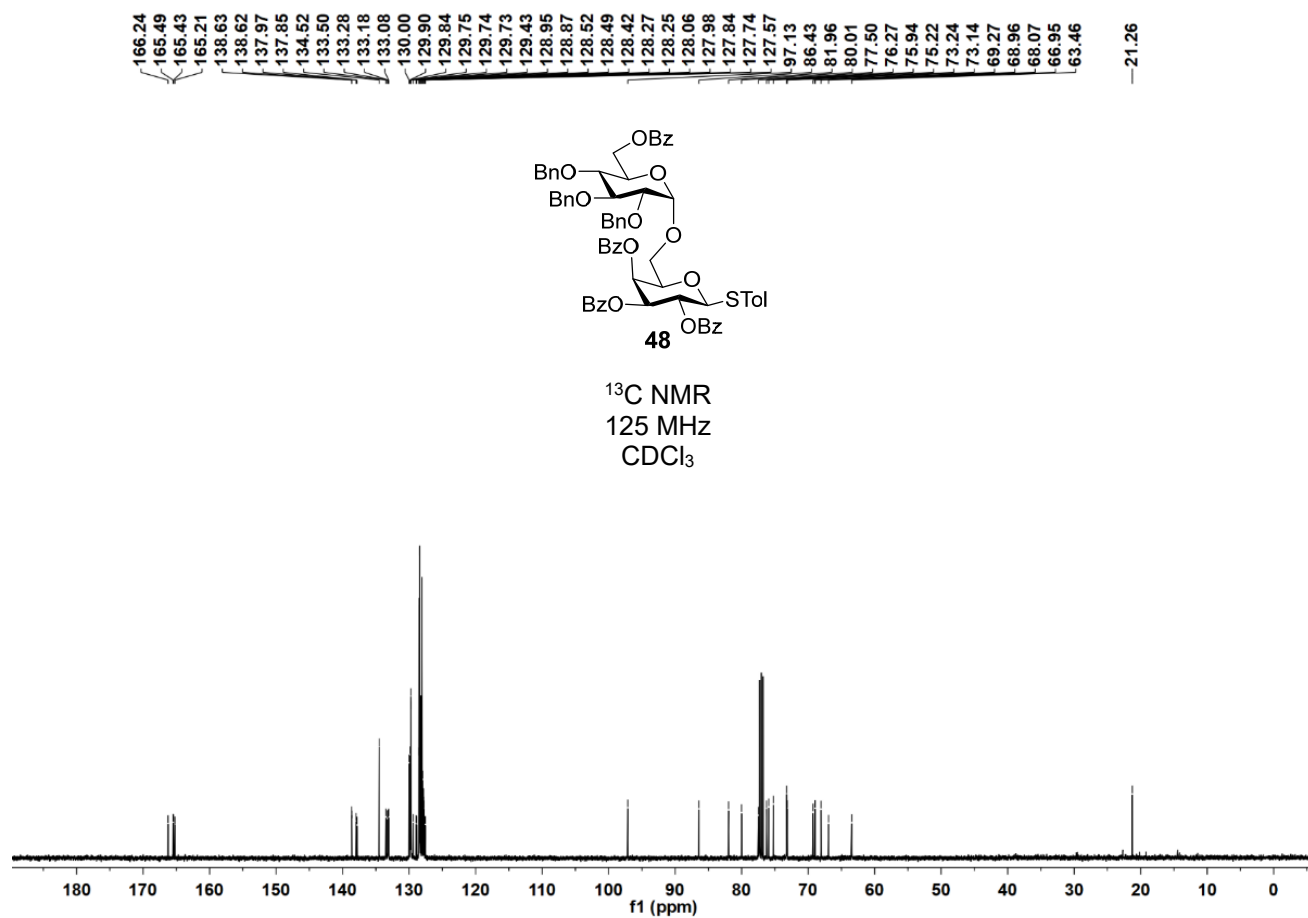



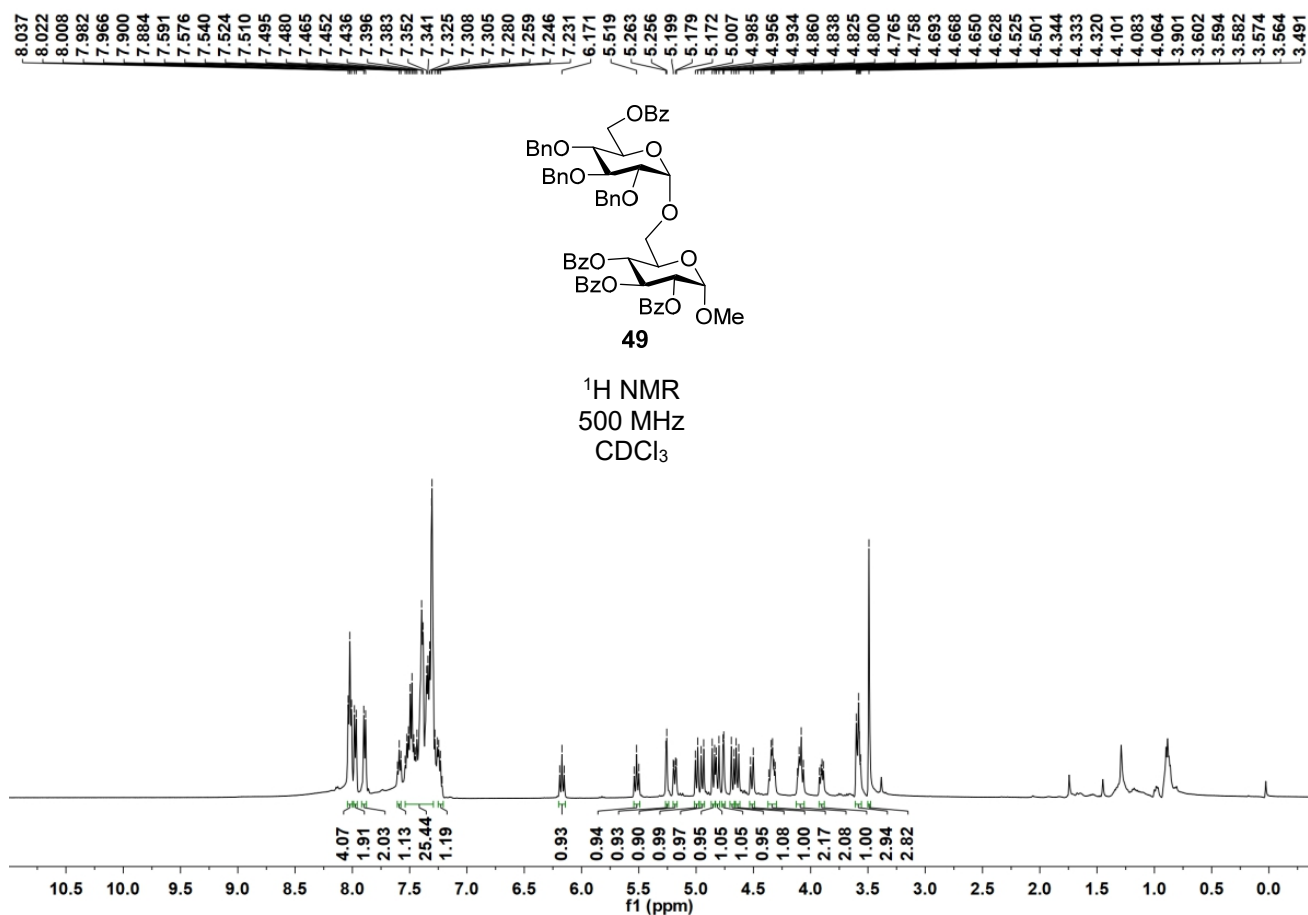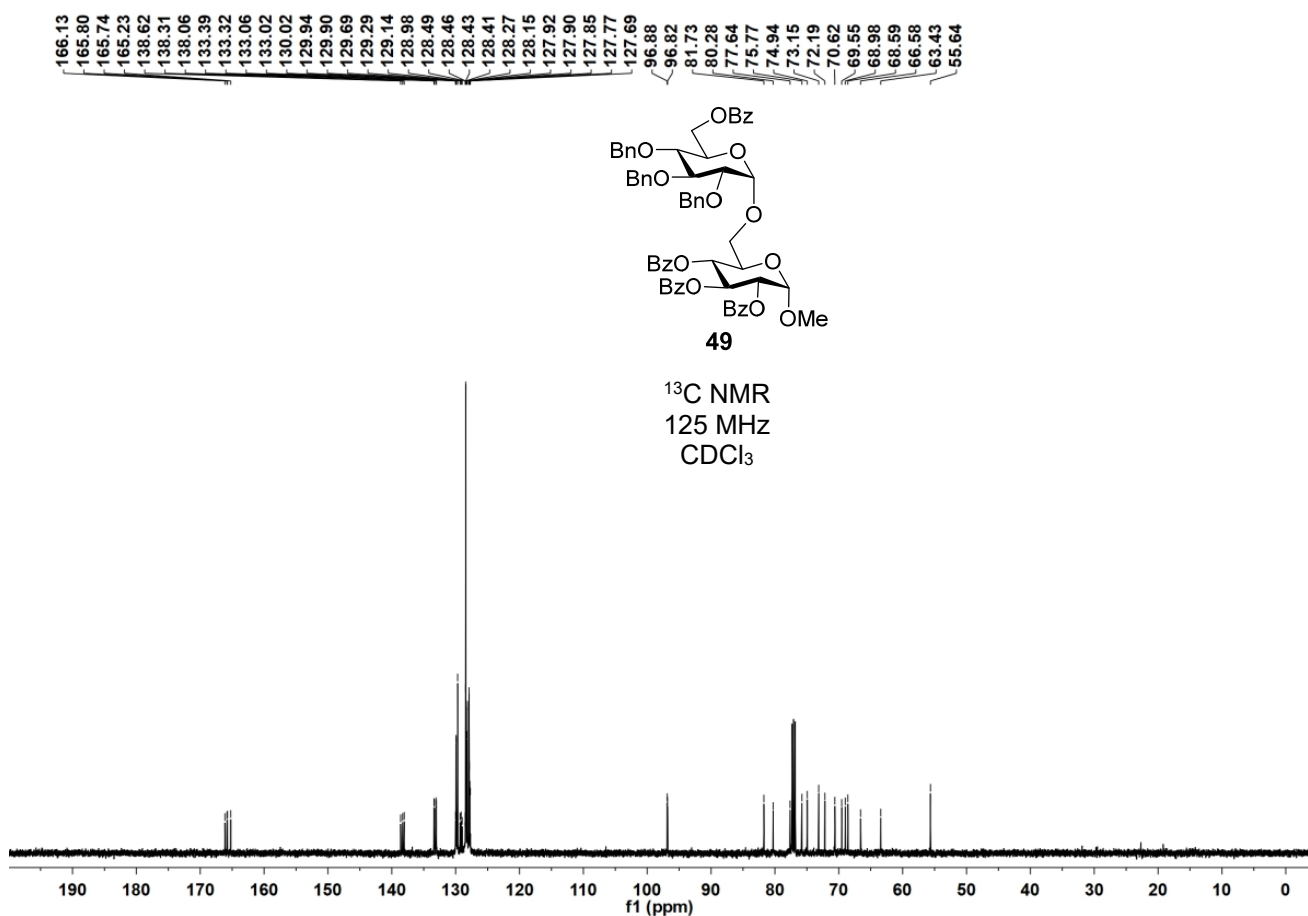

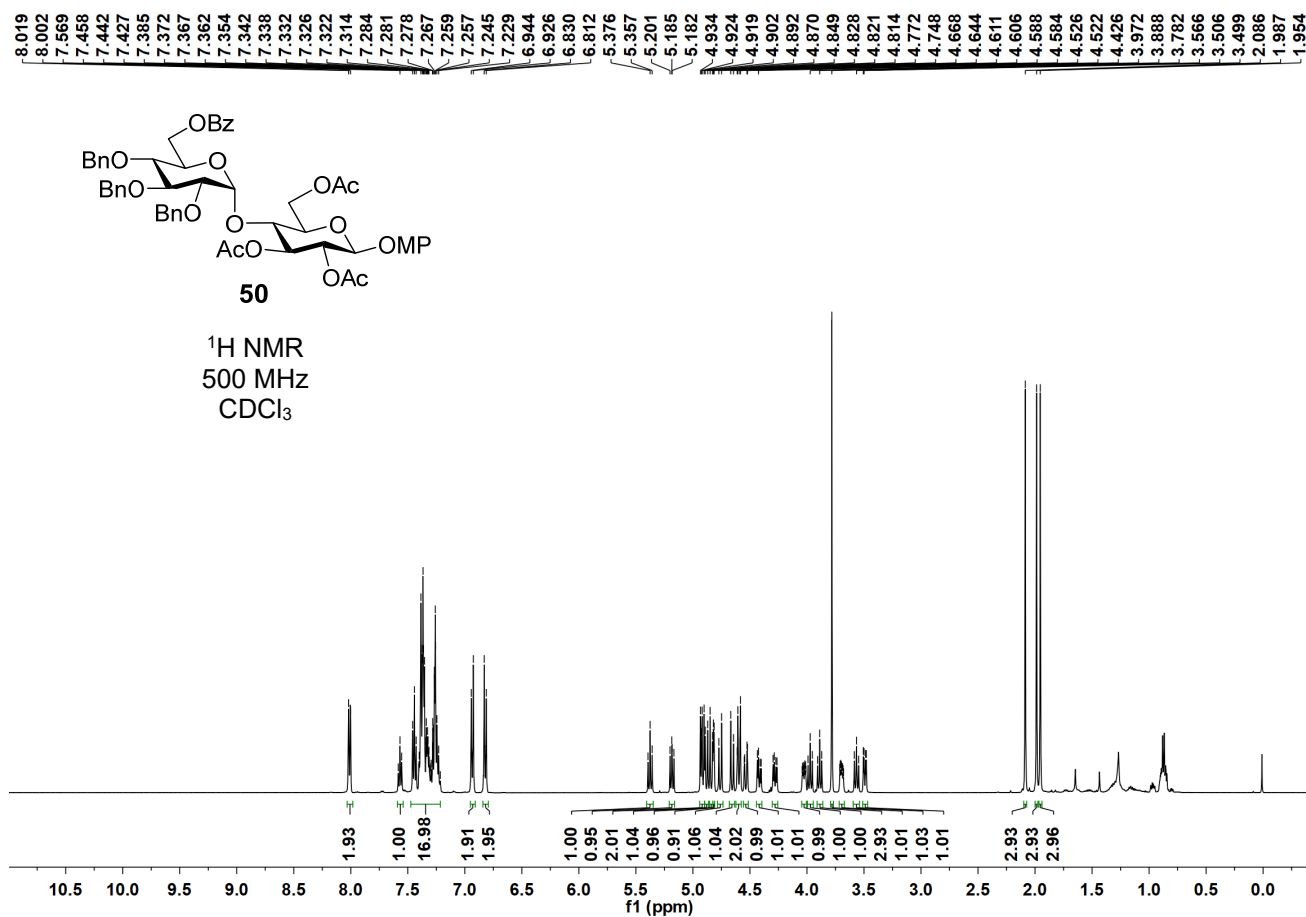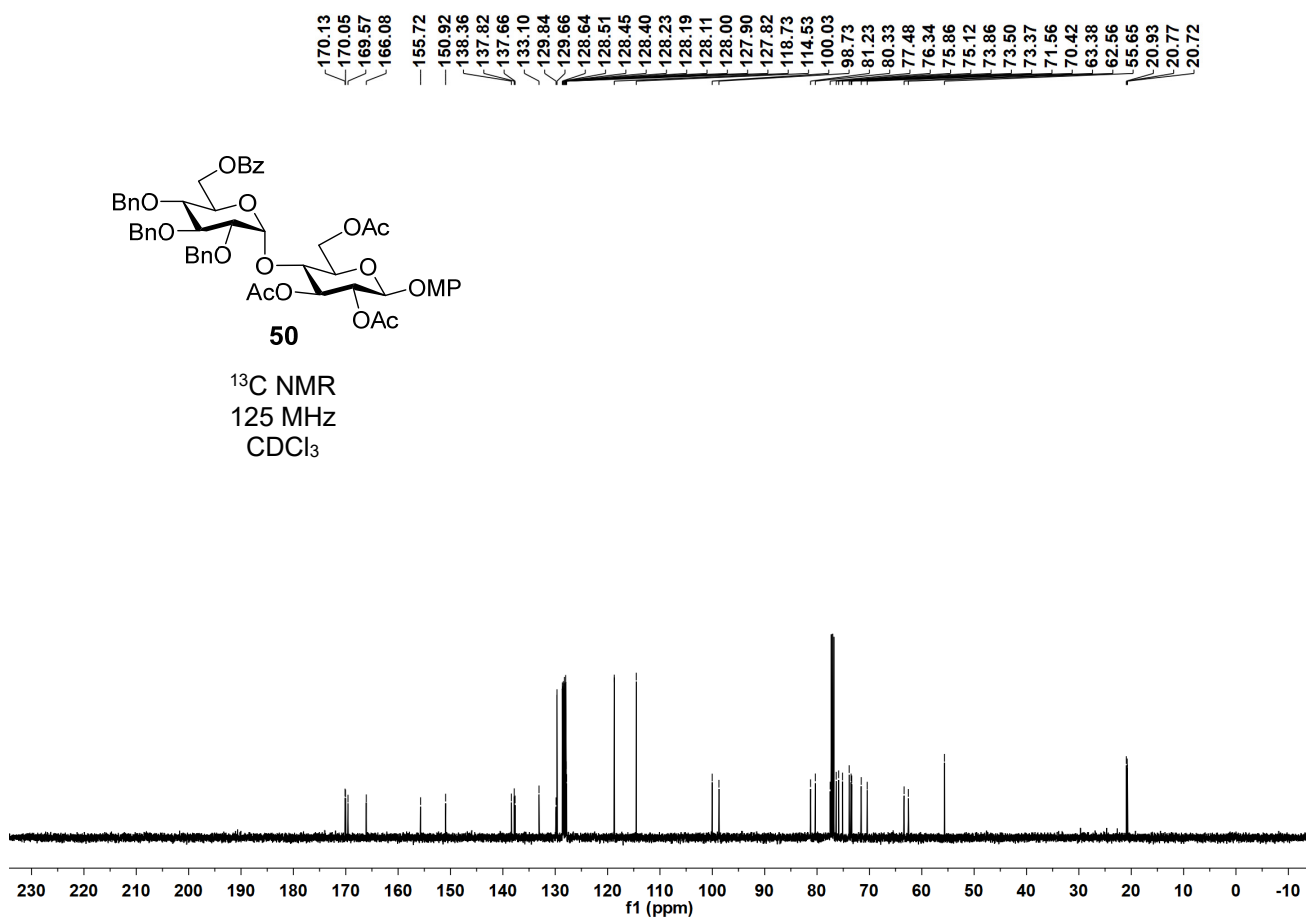

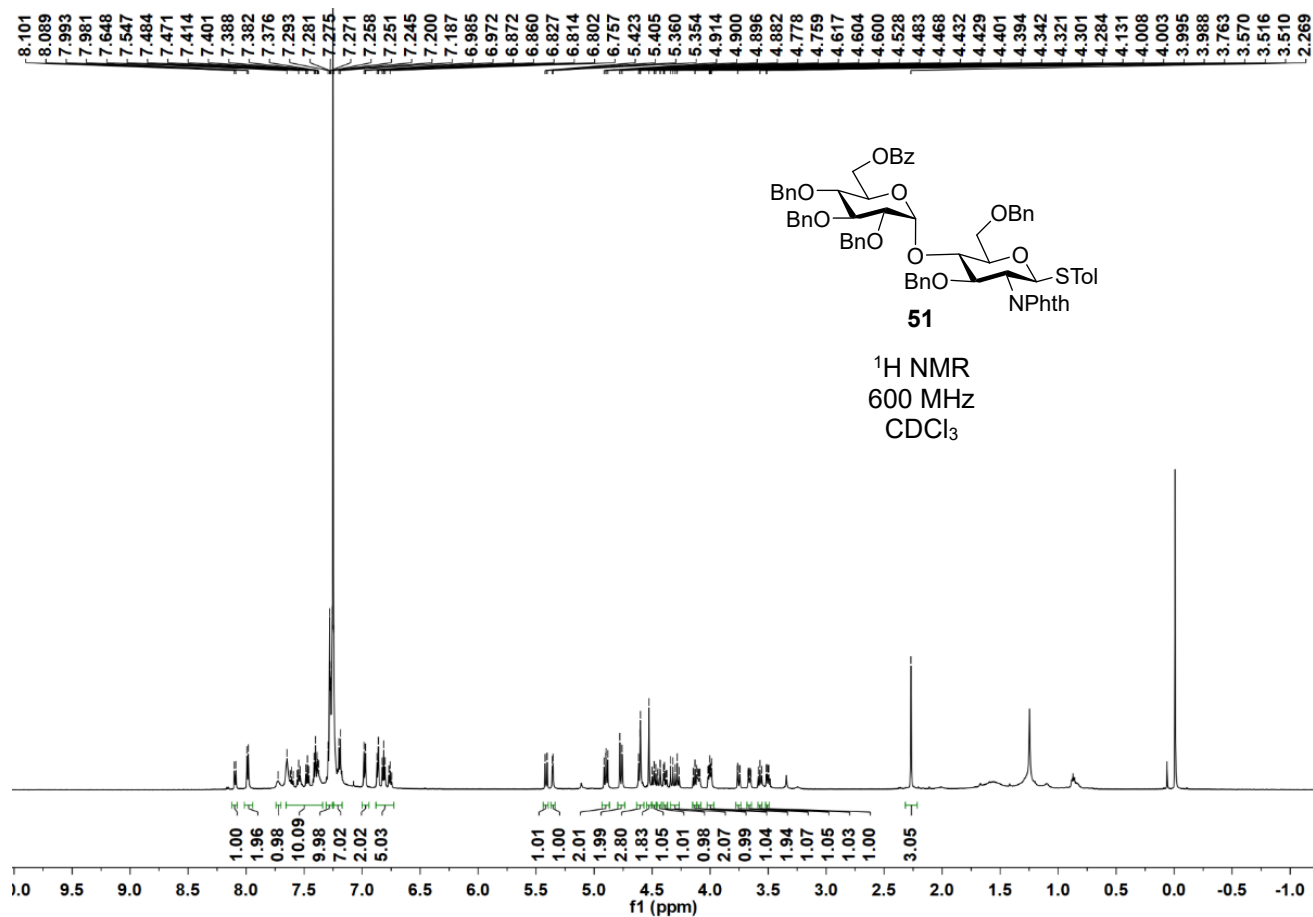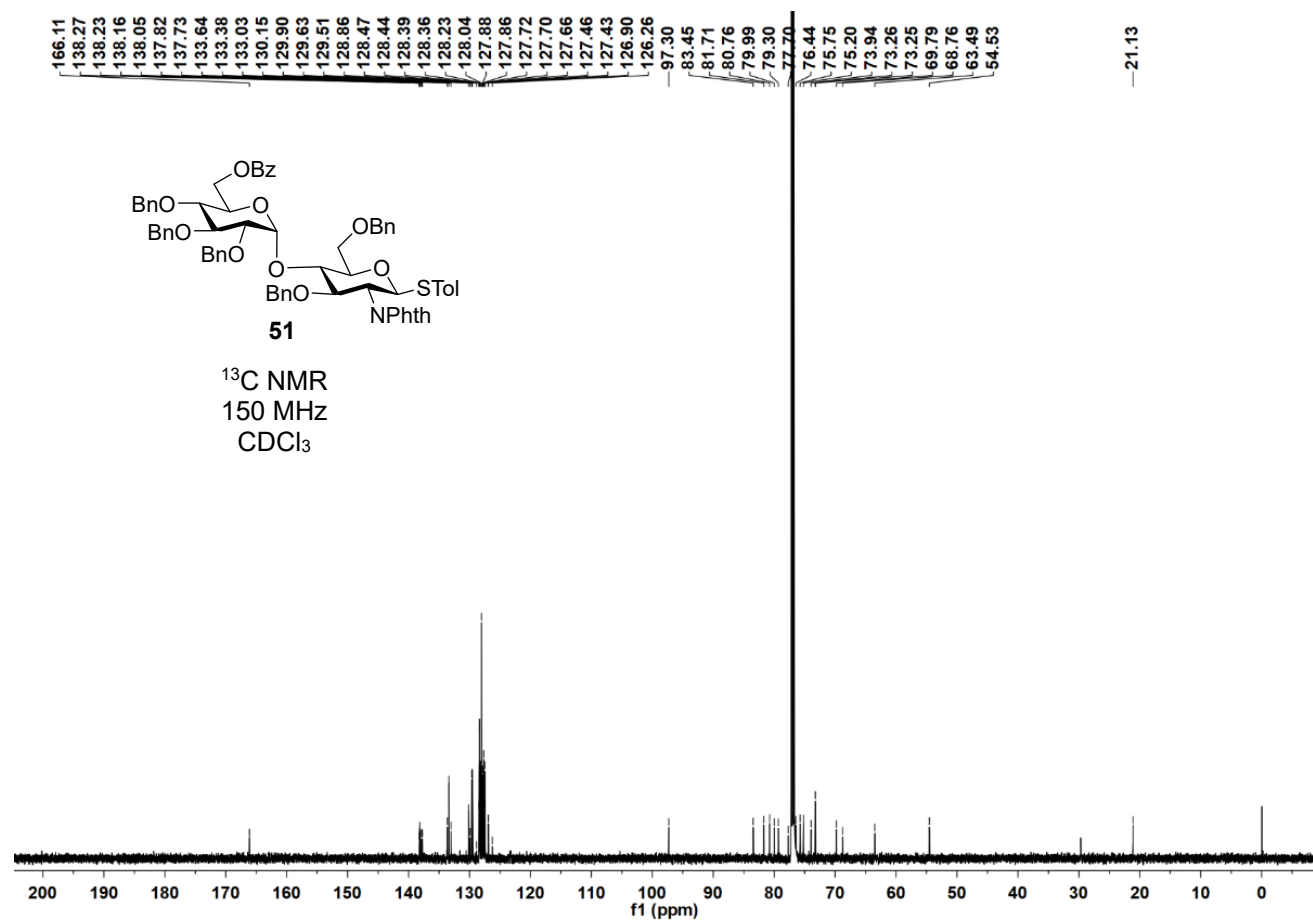

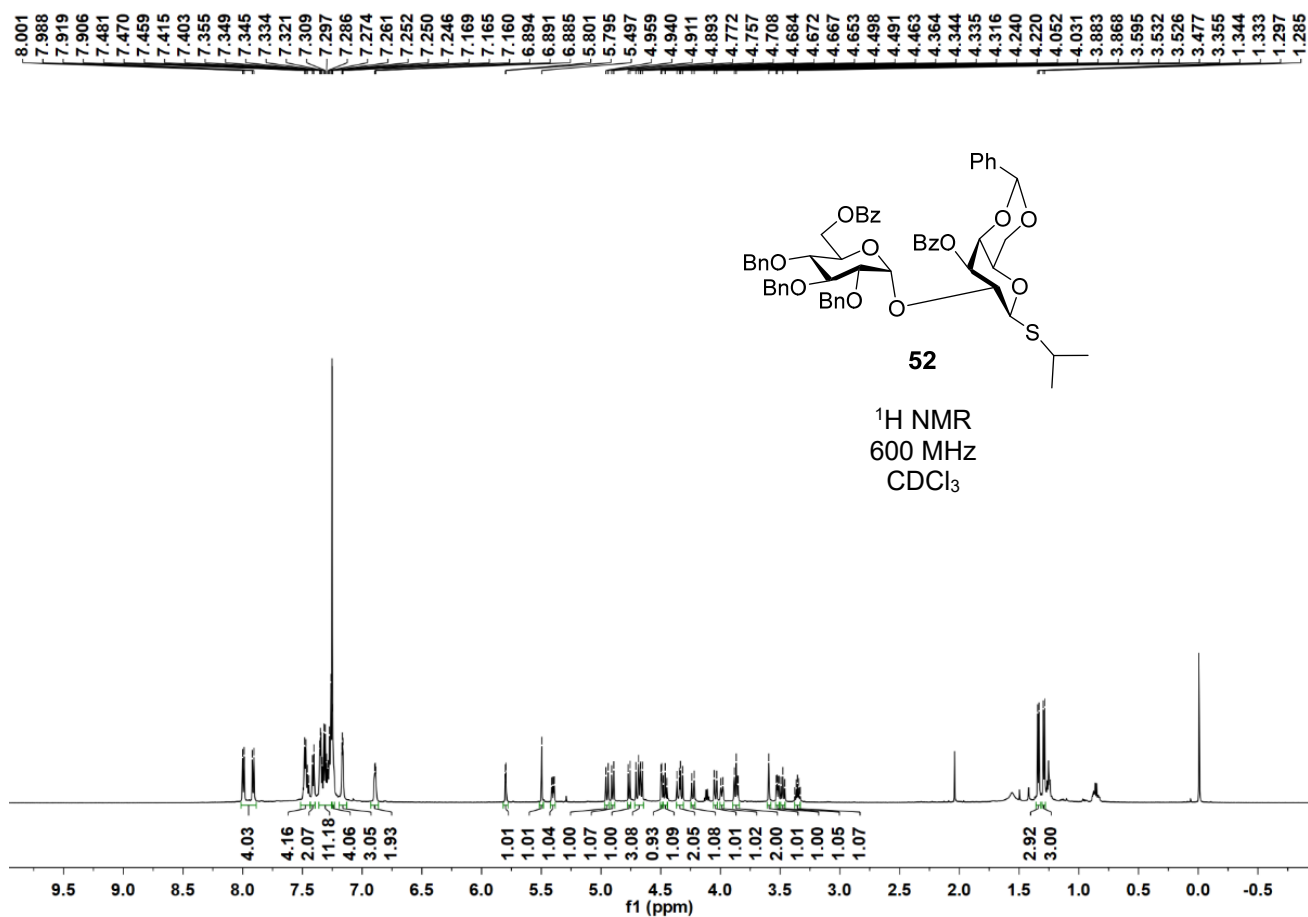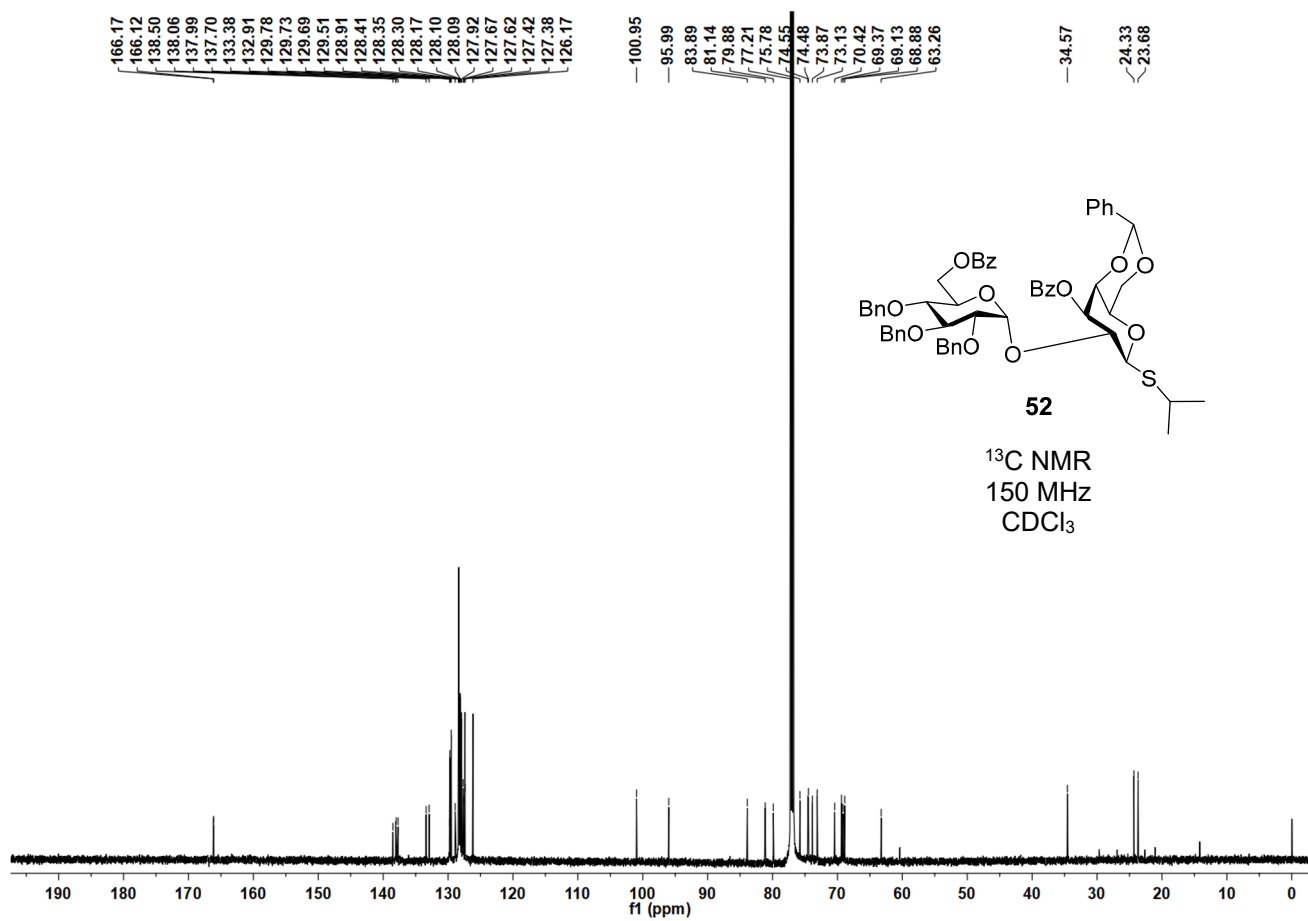

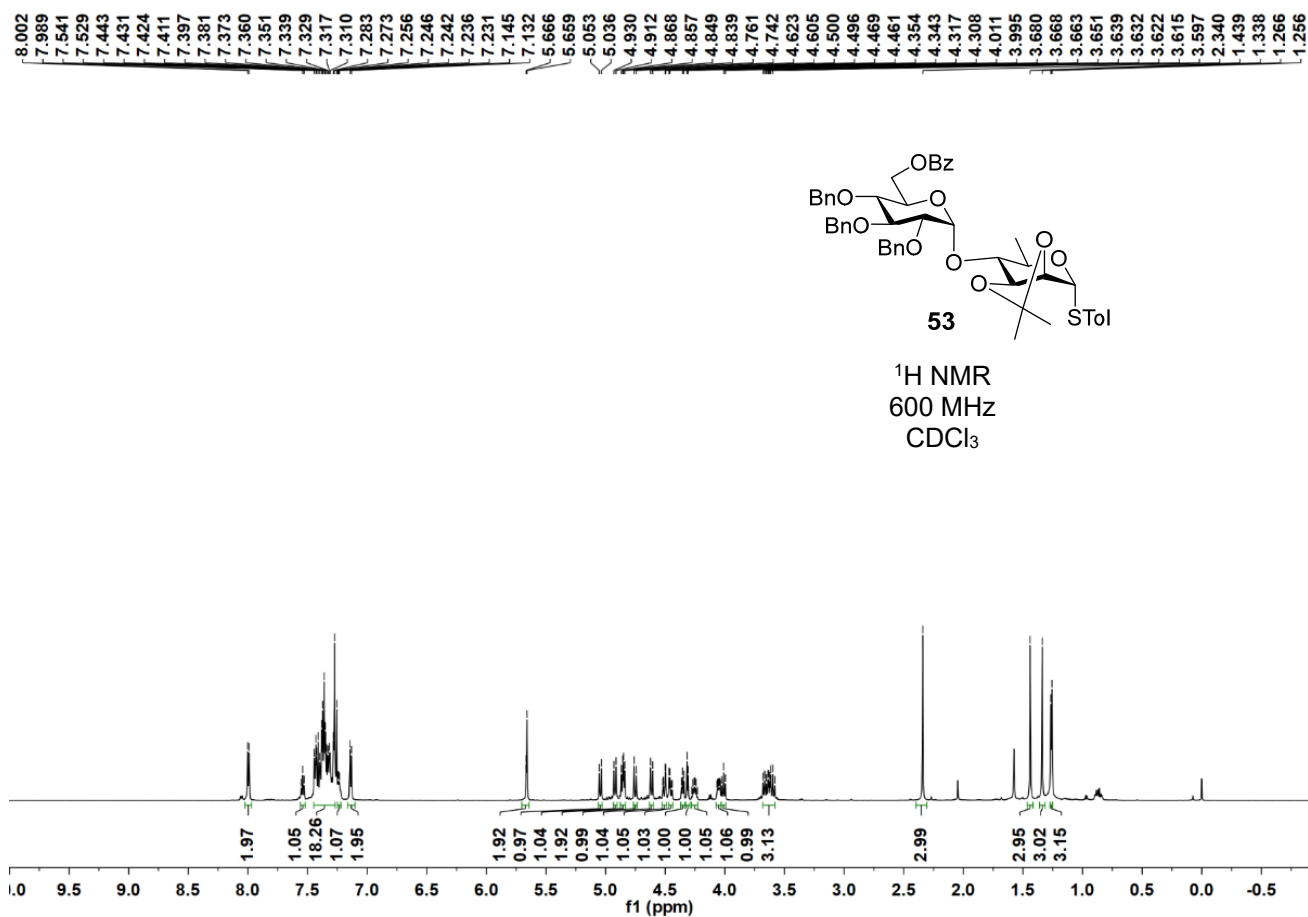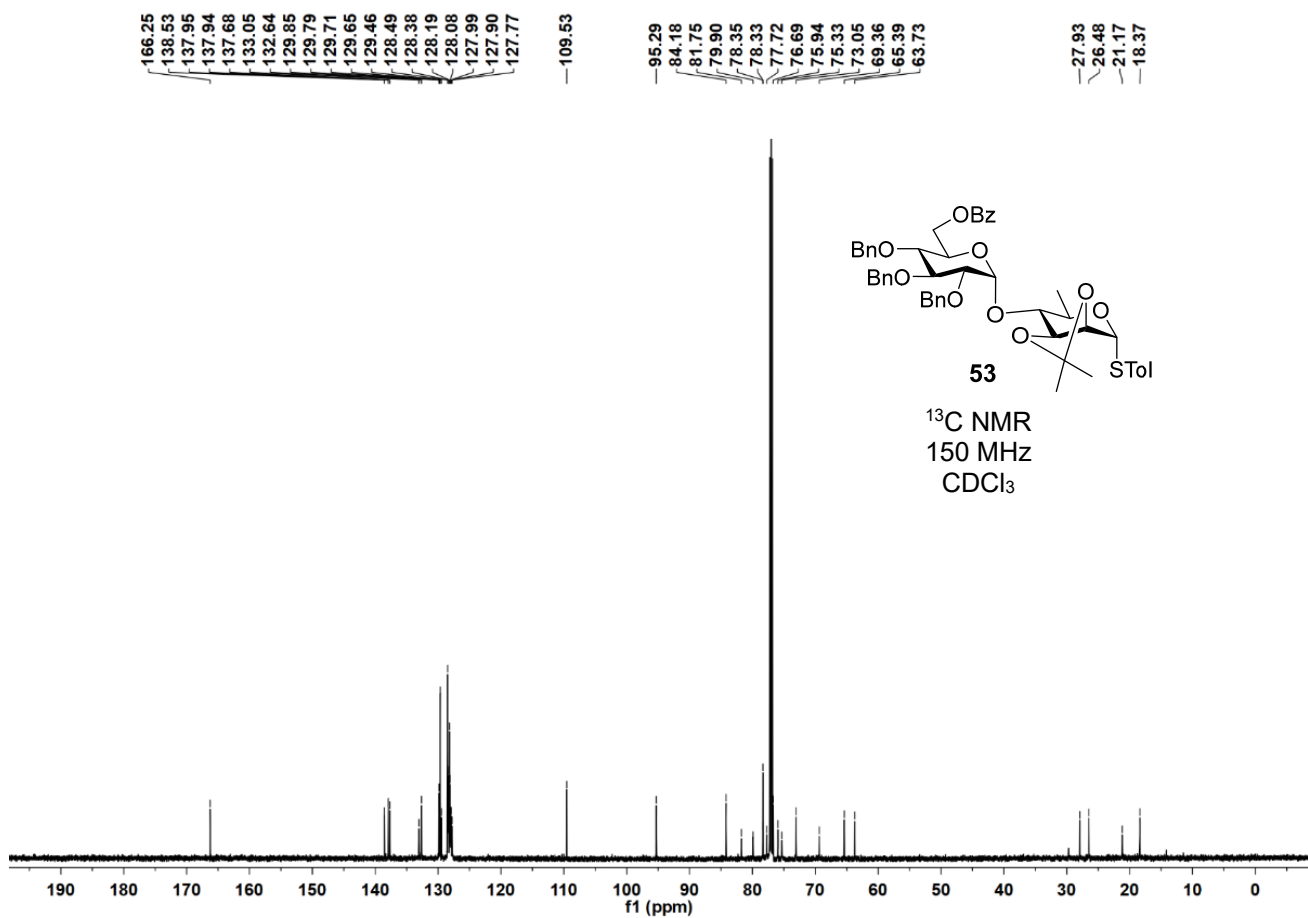

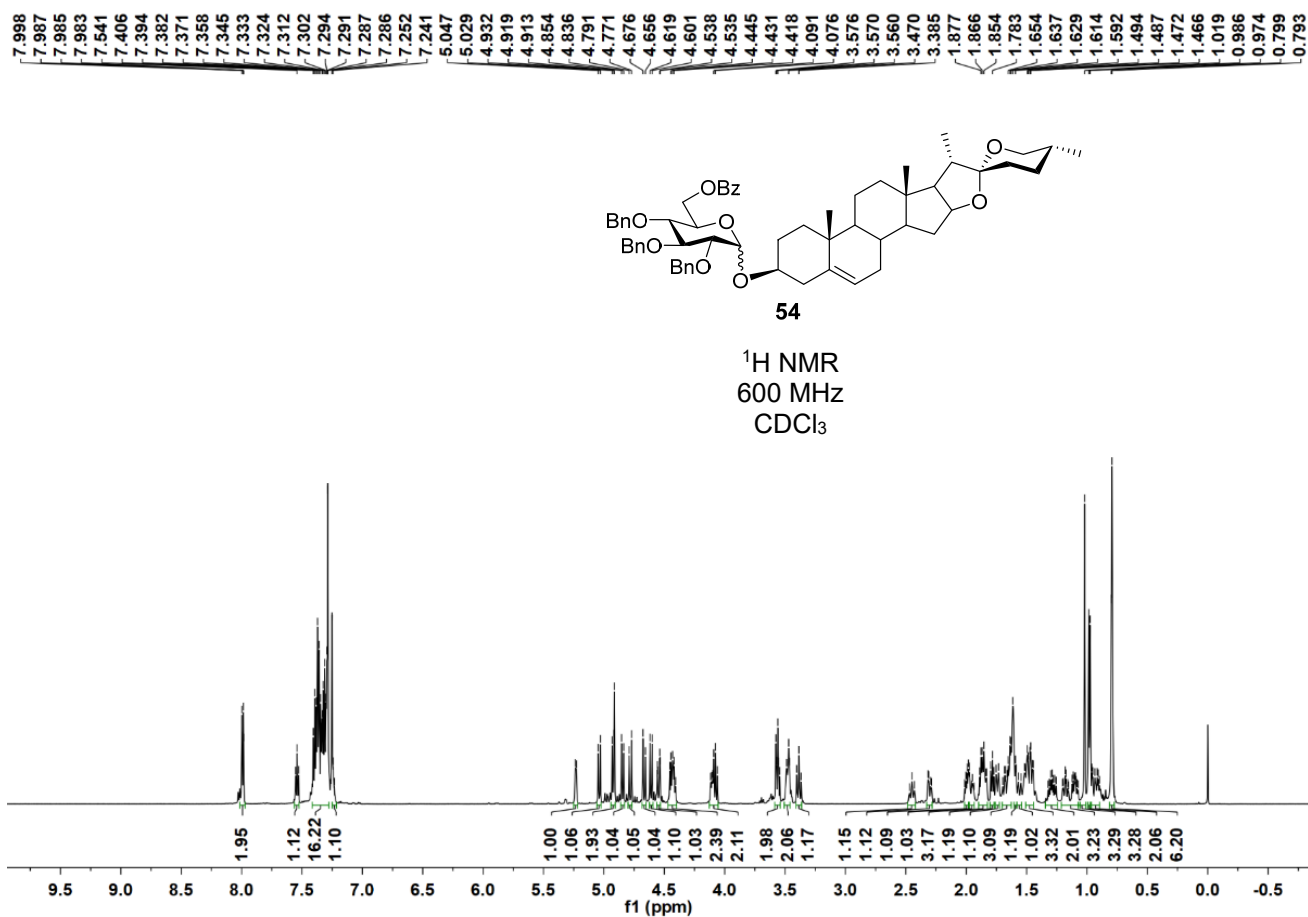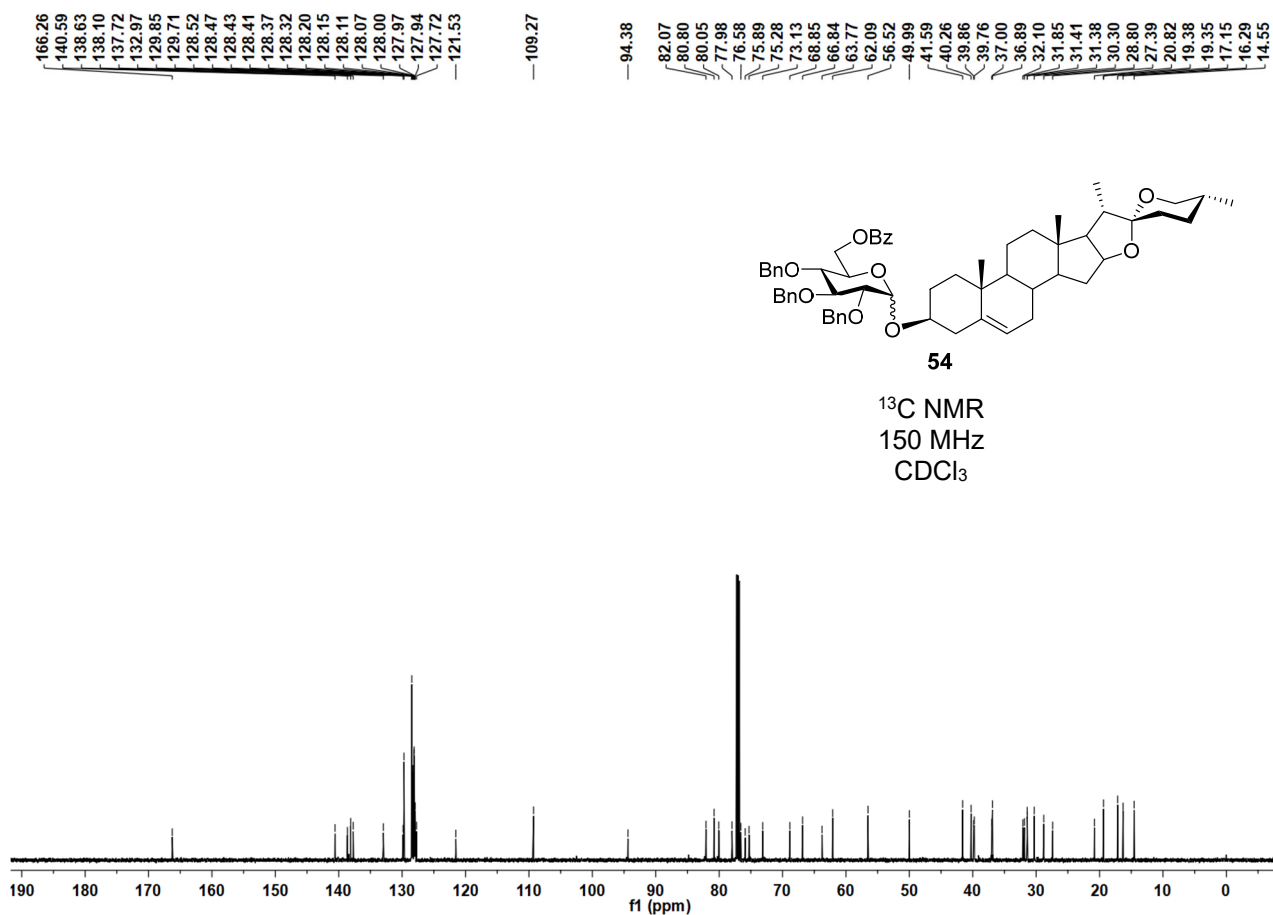

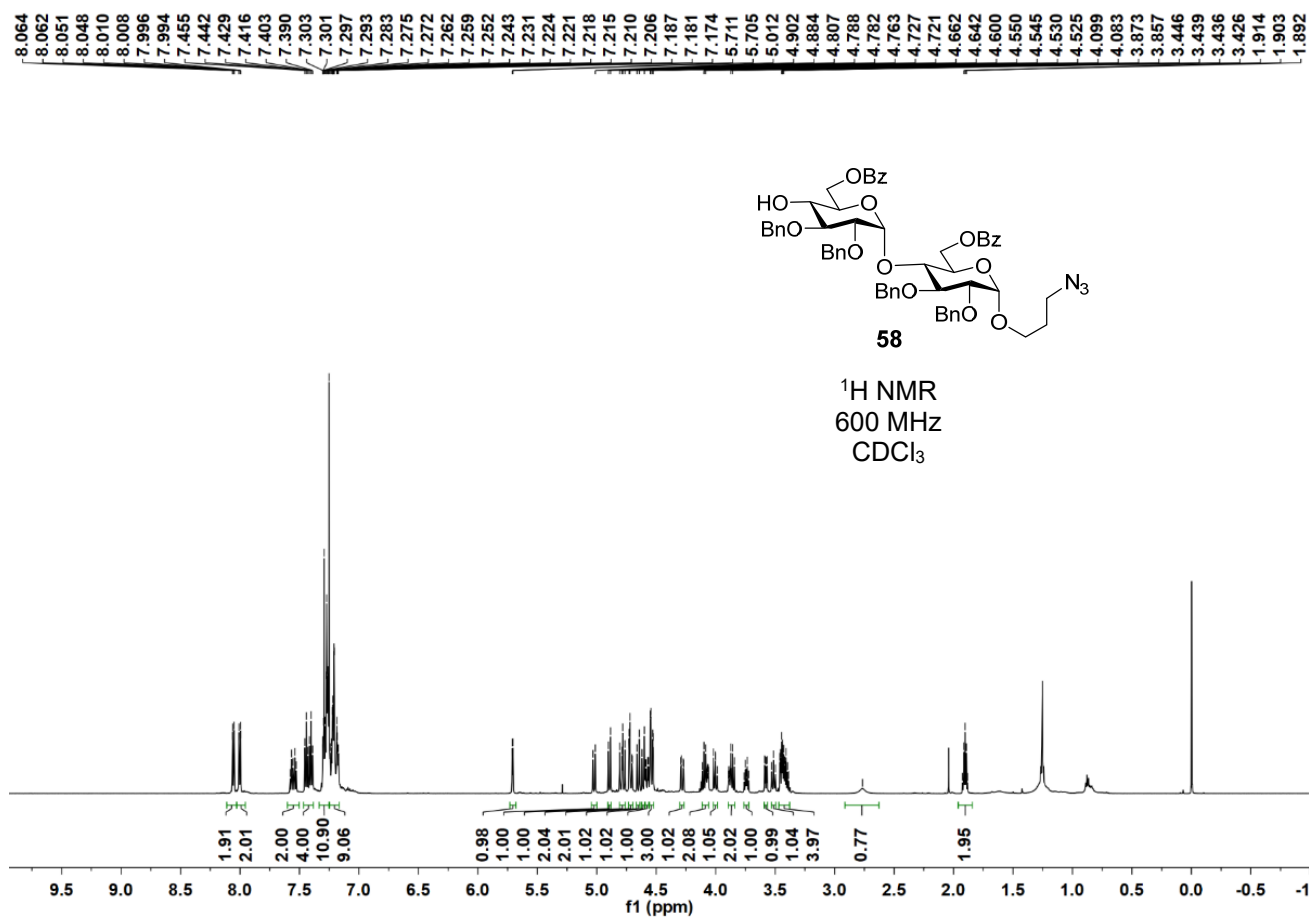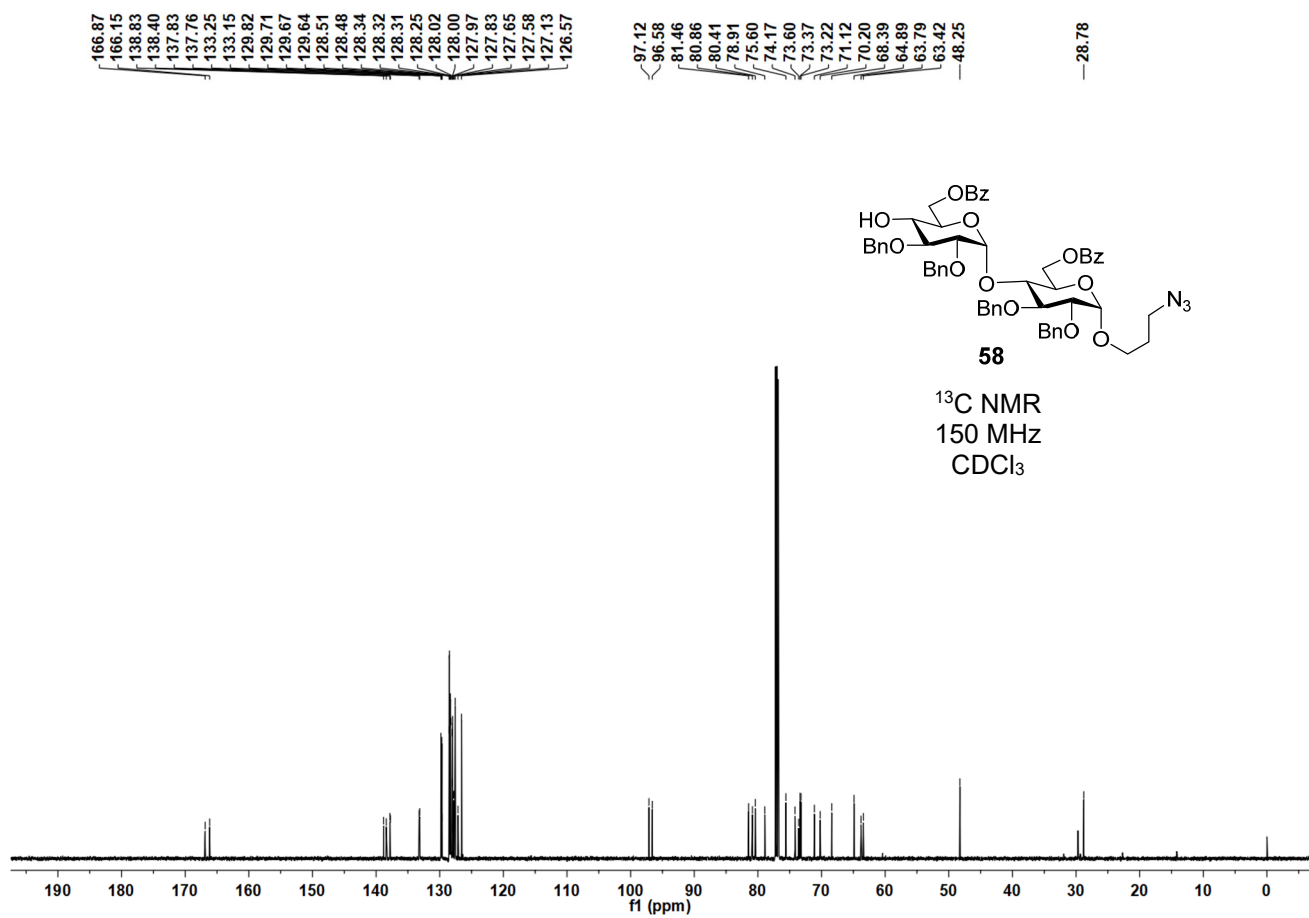

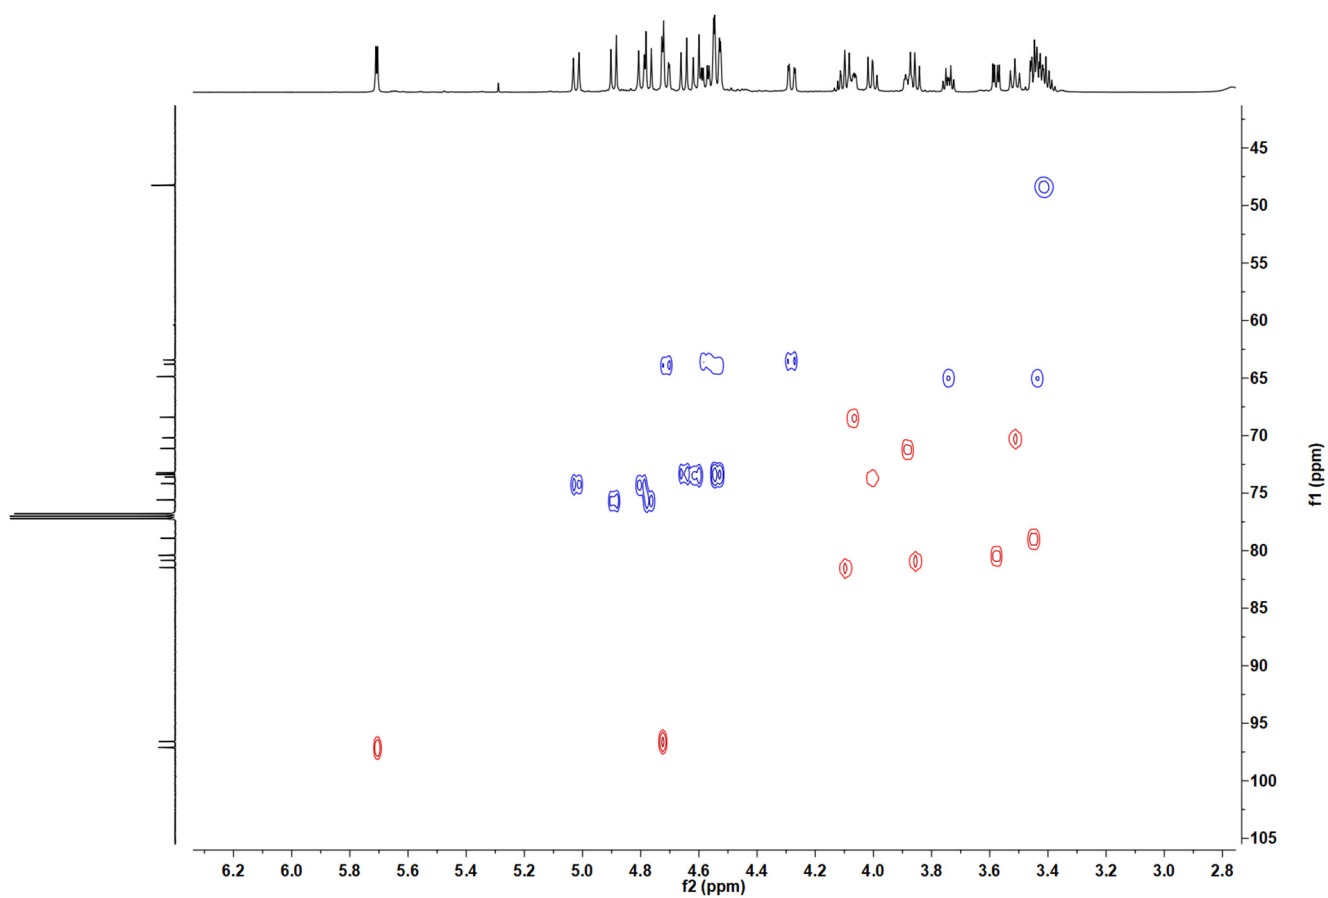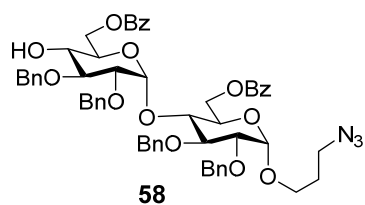

<sup>1</sup>H-<sup>13</sup>C HSQC  
600/150 MHz  
CDCl<sub>3</sub>



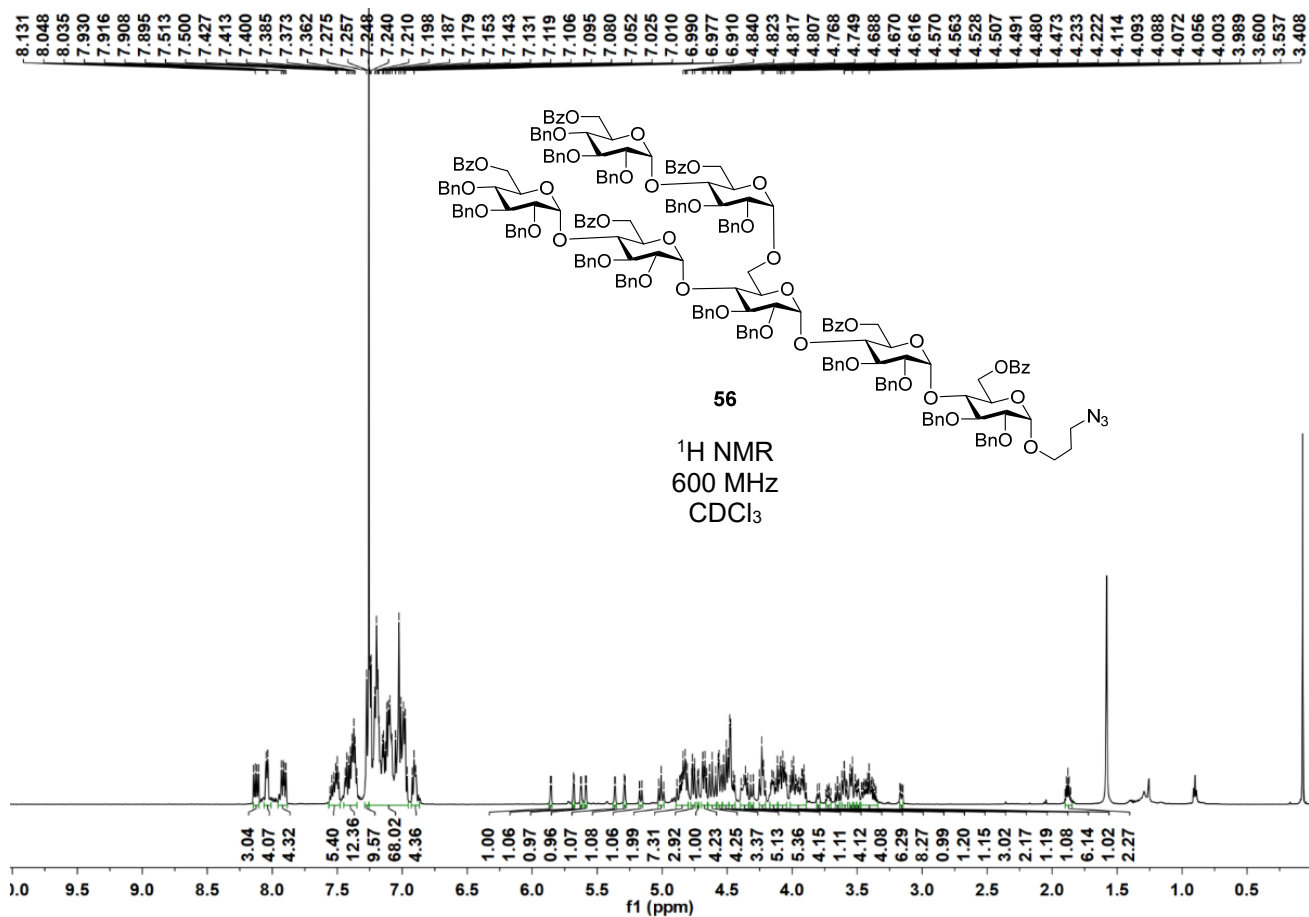

5.860  
5.854

5.683  
5.677  
5.628  
5.622  
5.591  
5.585

5.366  
5.361  
5.292  
5.286

4.727  
4.721

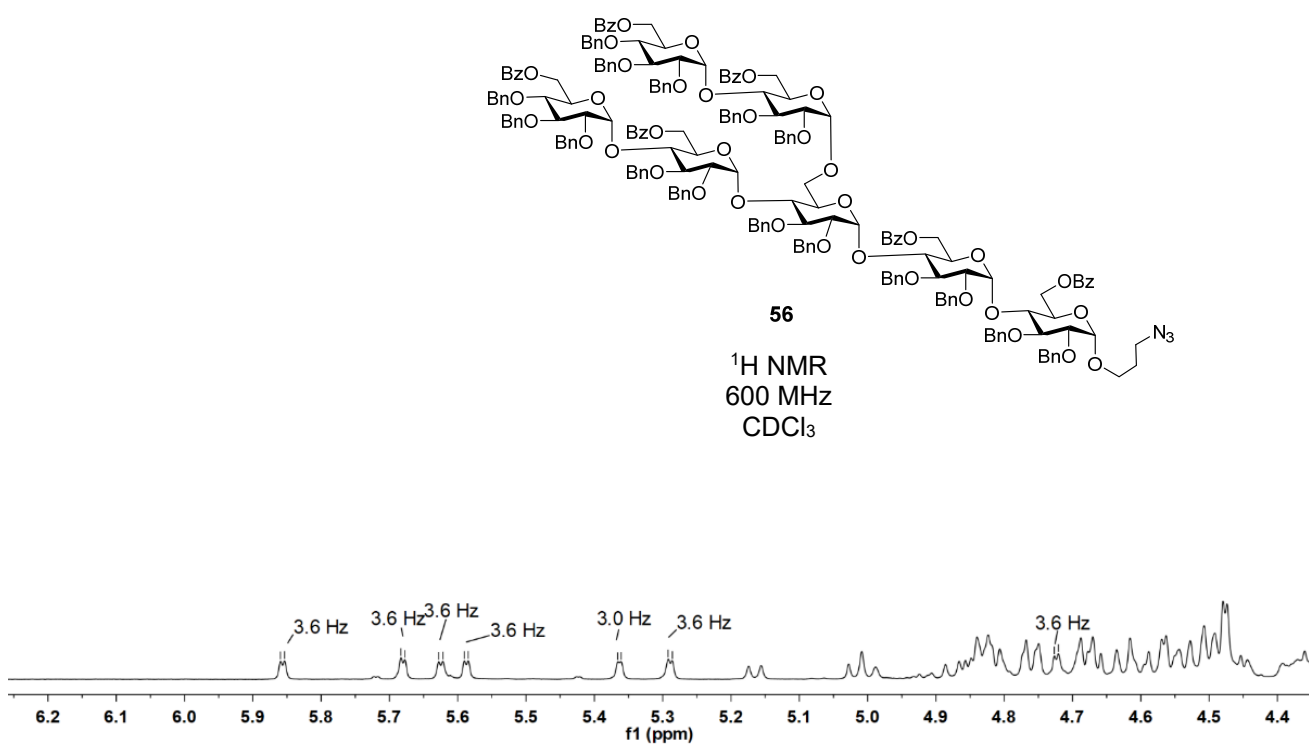

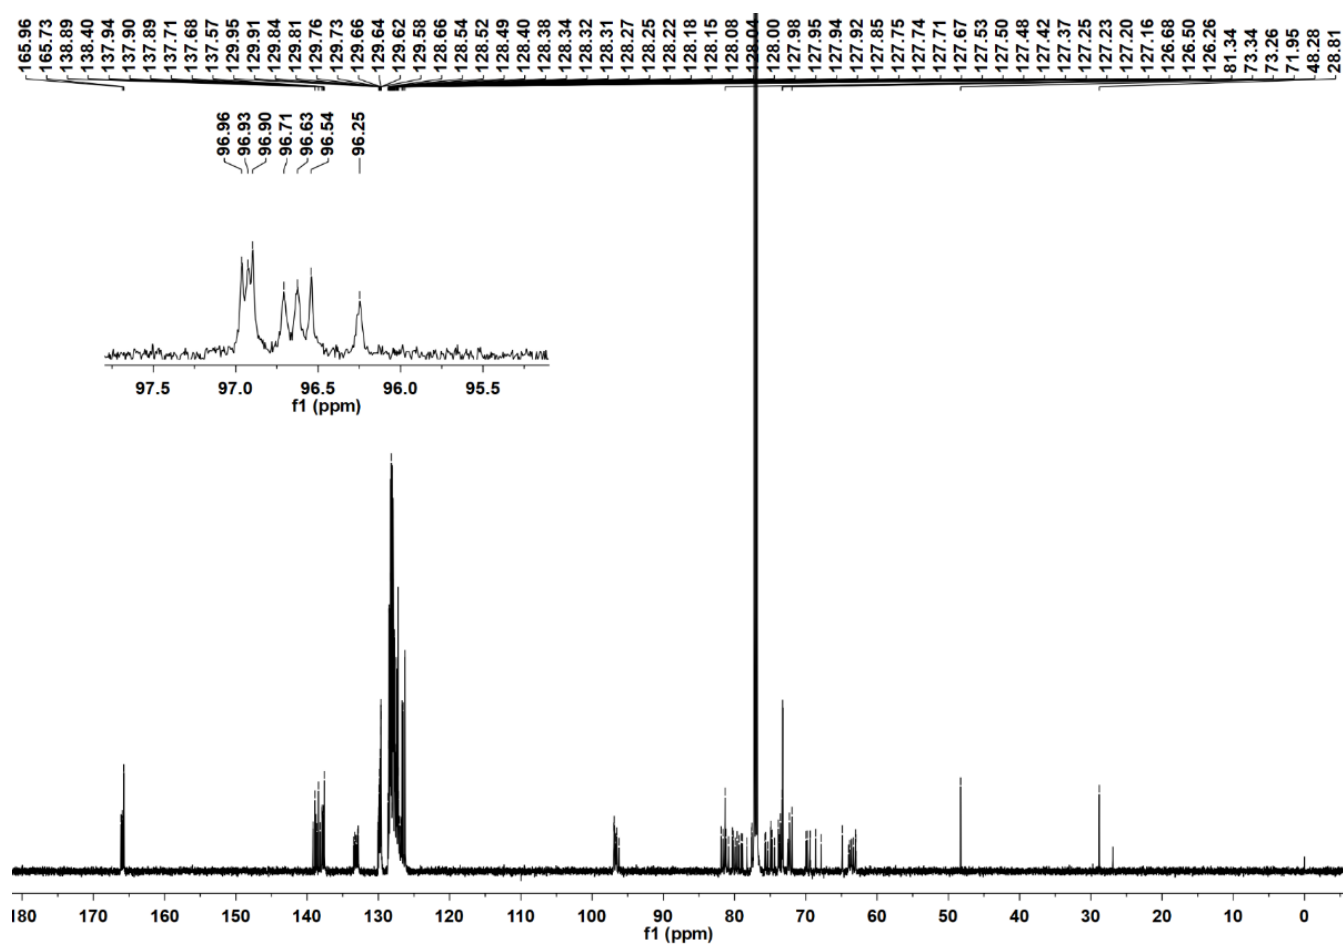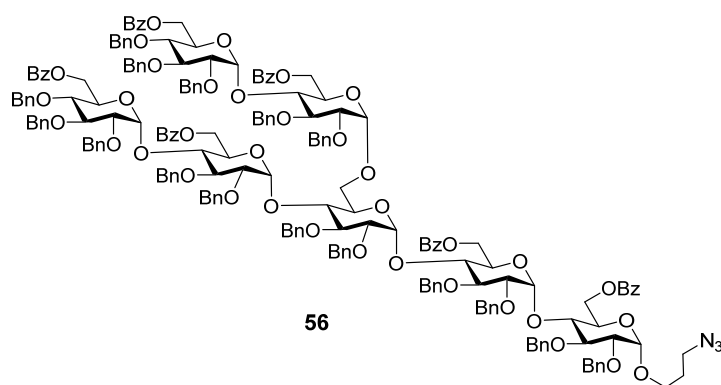

<sup>13</sup>C NMR  
150 MHz  
CDCl<sub>3</sub>

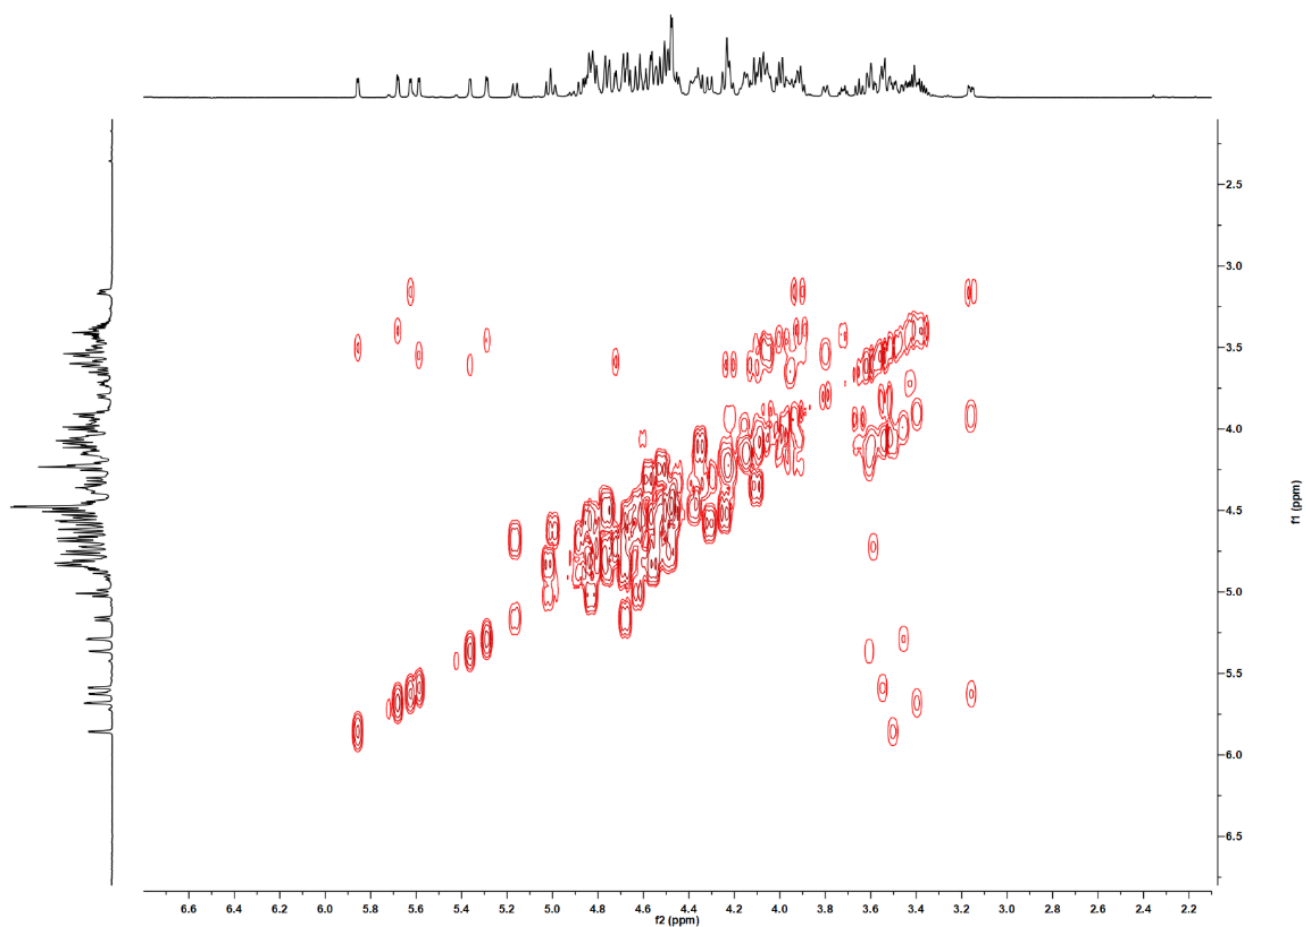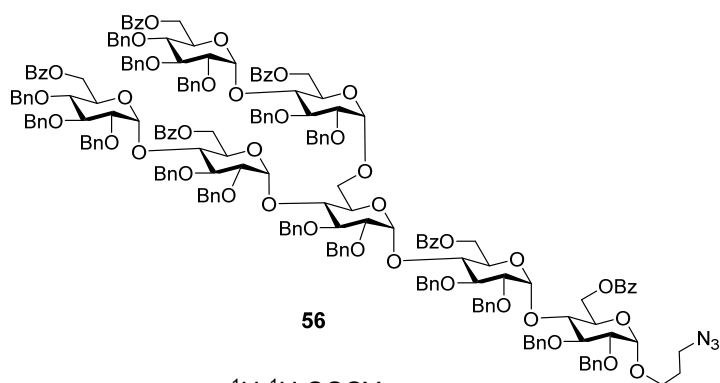

<sup>1</sup>H-<sup>1</sup>H COSY  
600 MHz  
CDCl<sub>3</sub>

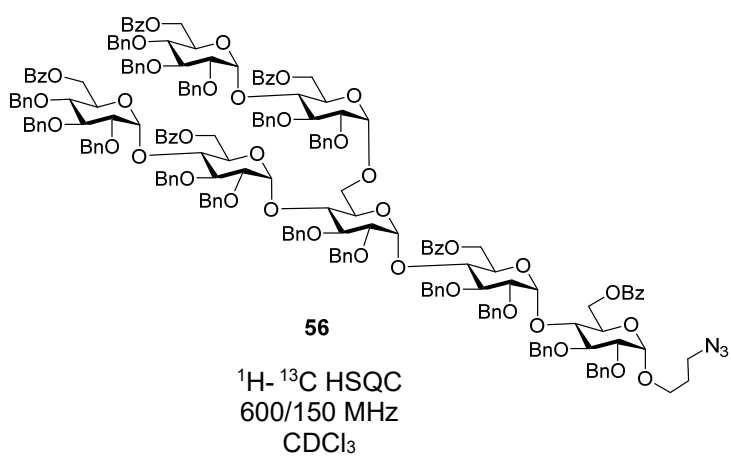

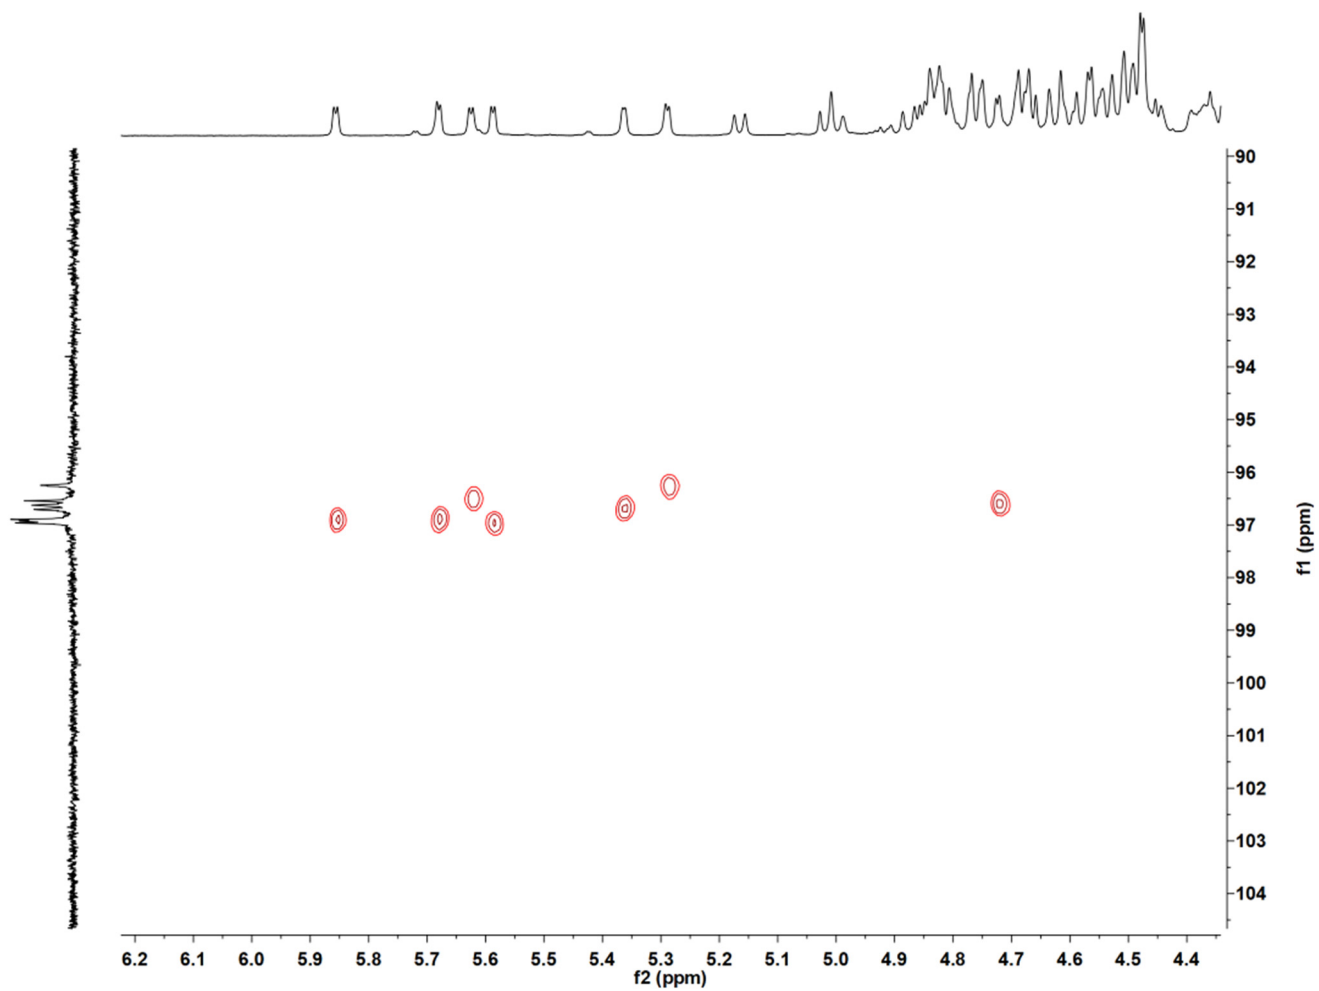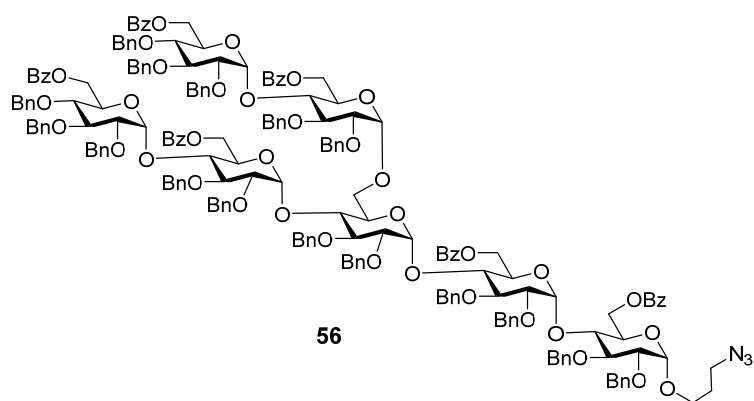

$^1\text{H}$ - $^{13}\text{C}$  HSQC  
600/150 MHz  
 $\text{CDCl}_3$

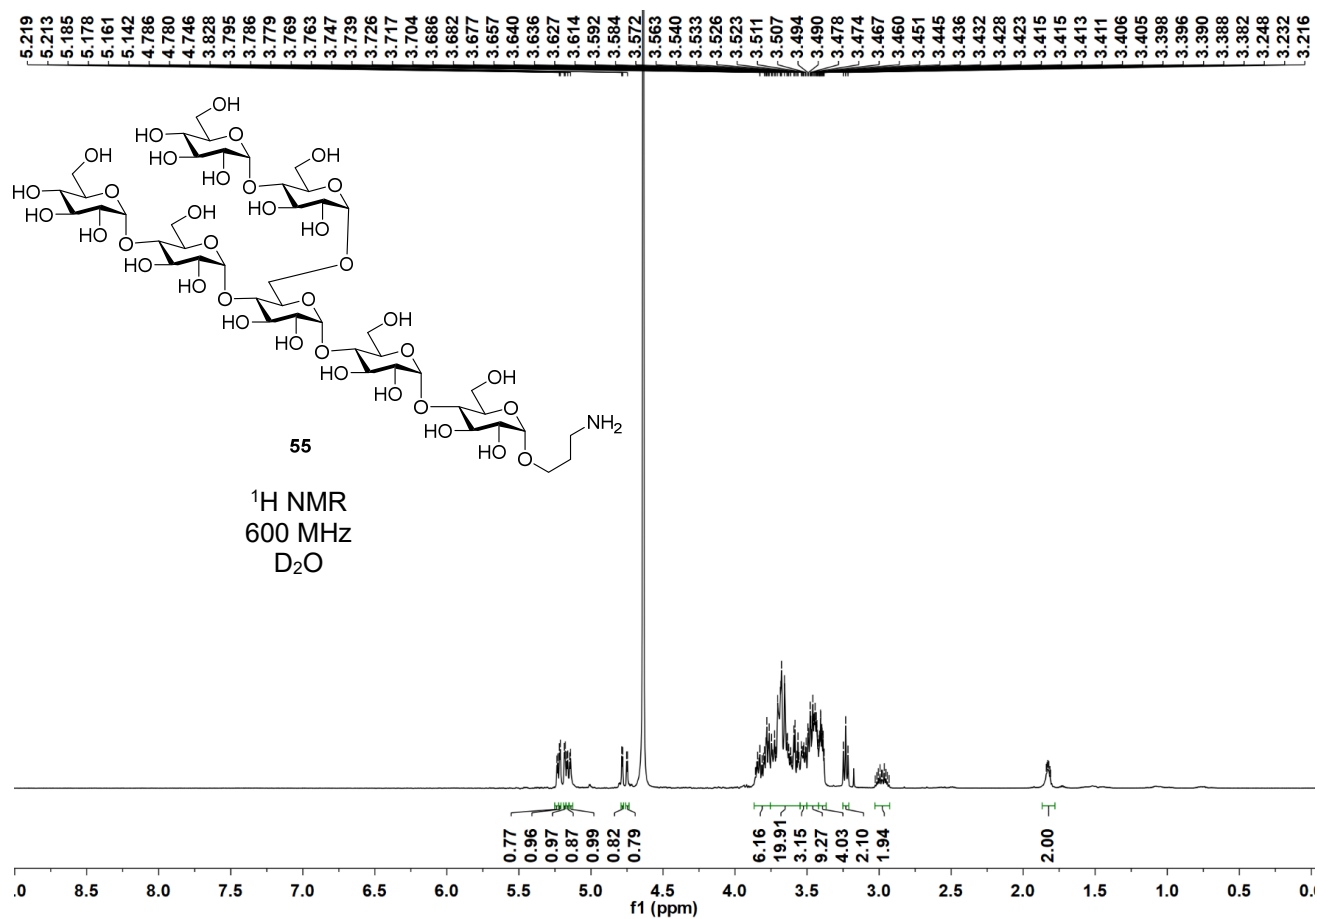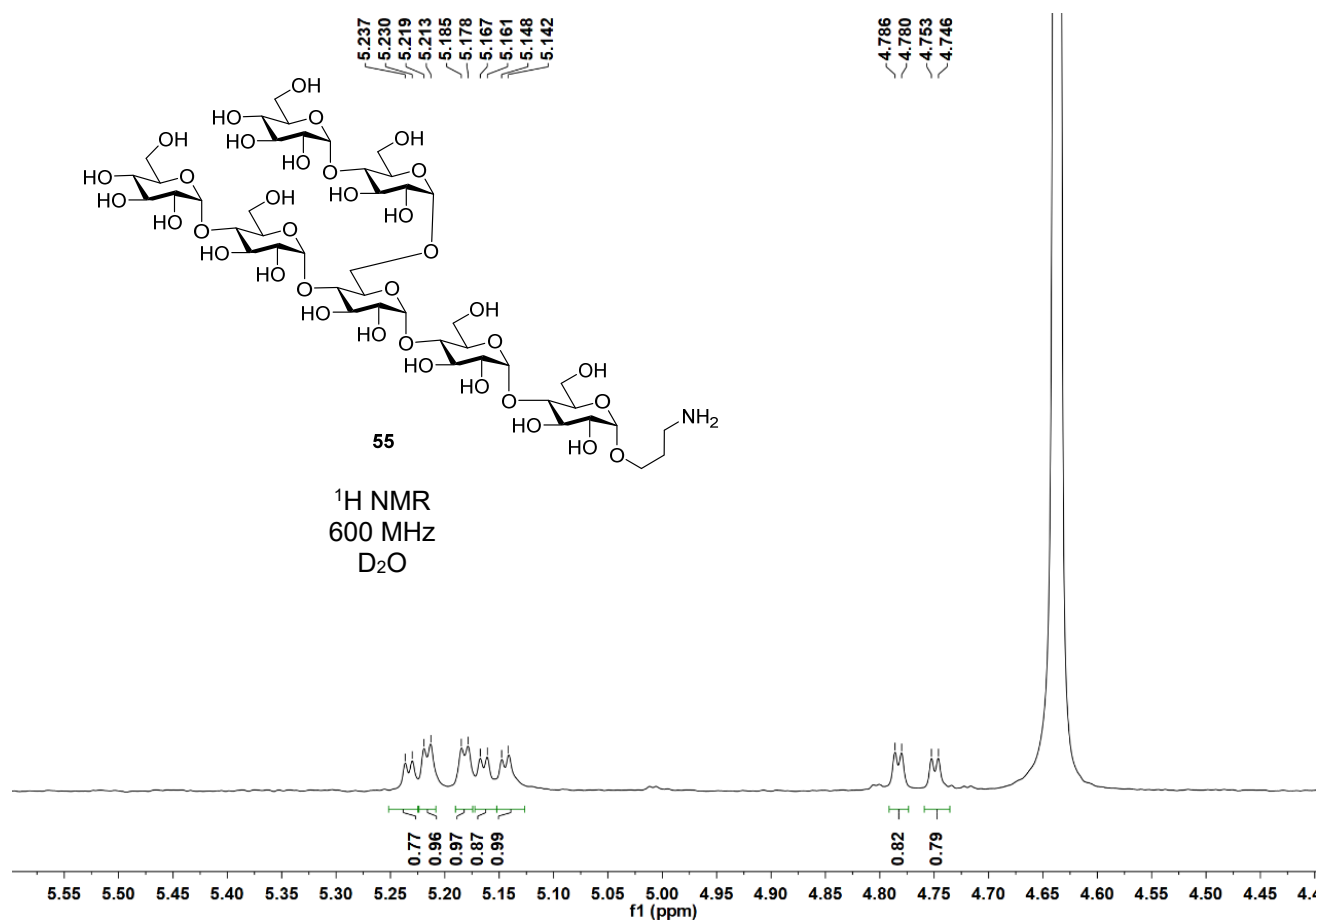

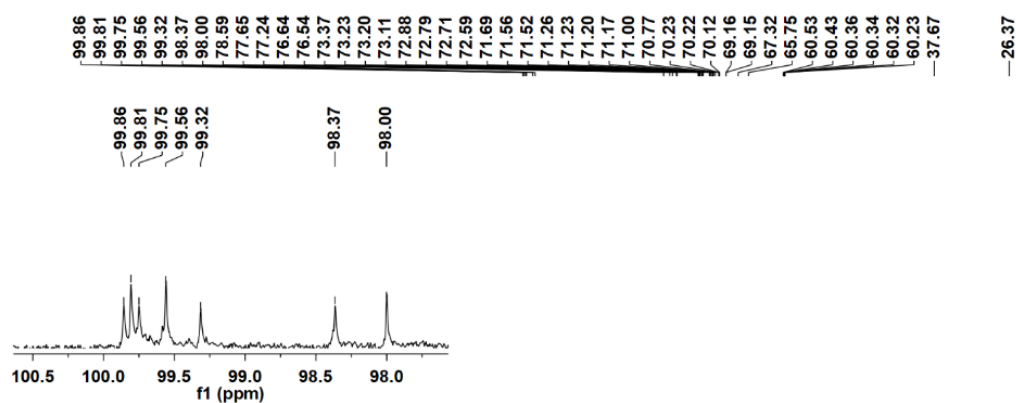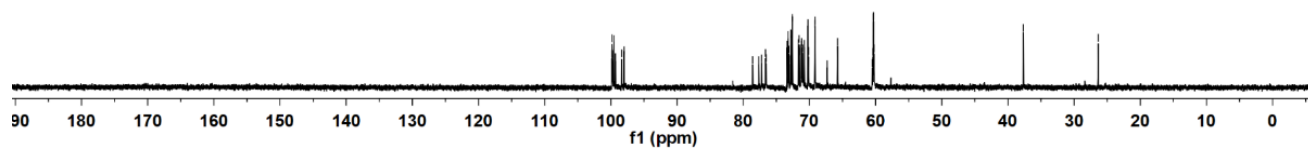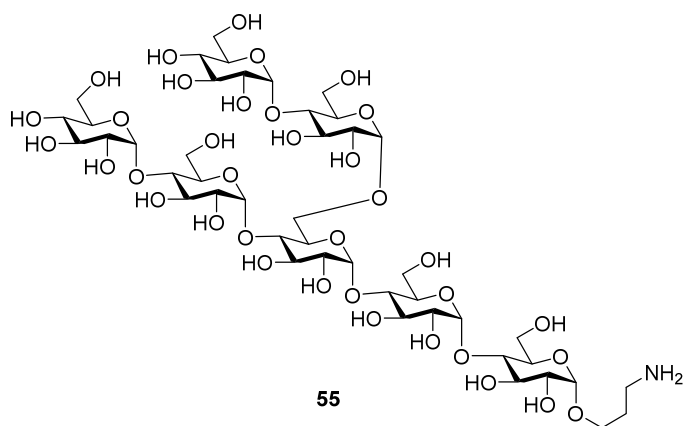

<sup>13</sup>C NMR  
150 MHz  
D<sub>2</sub>O

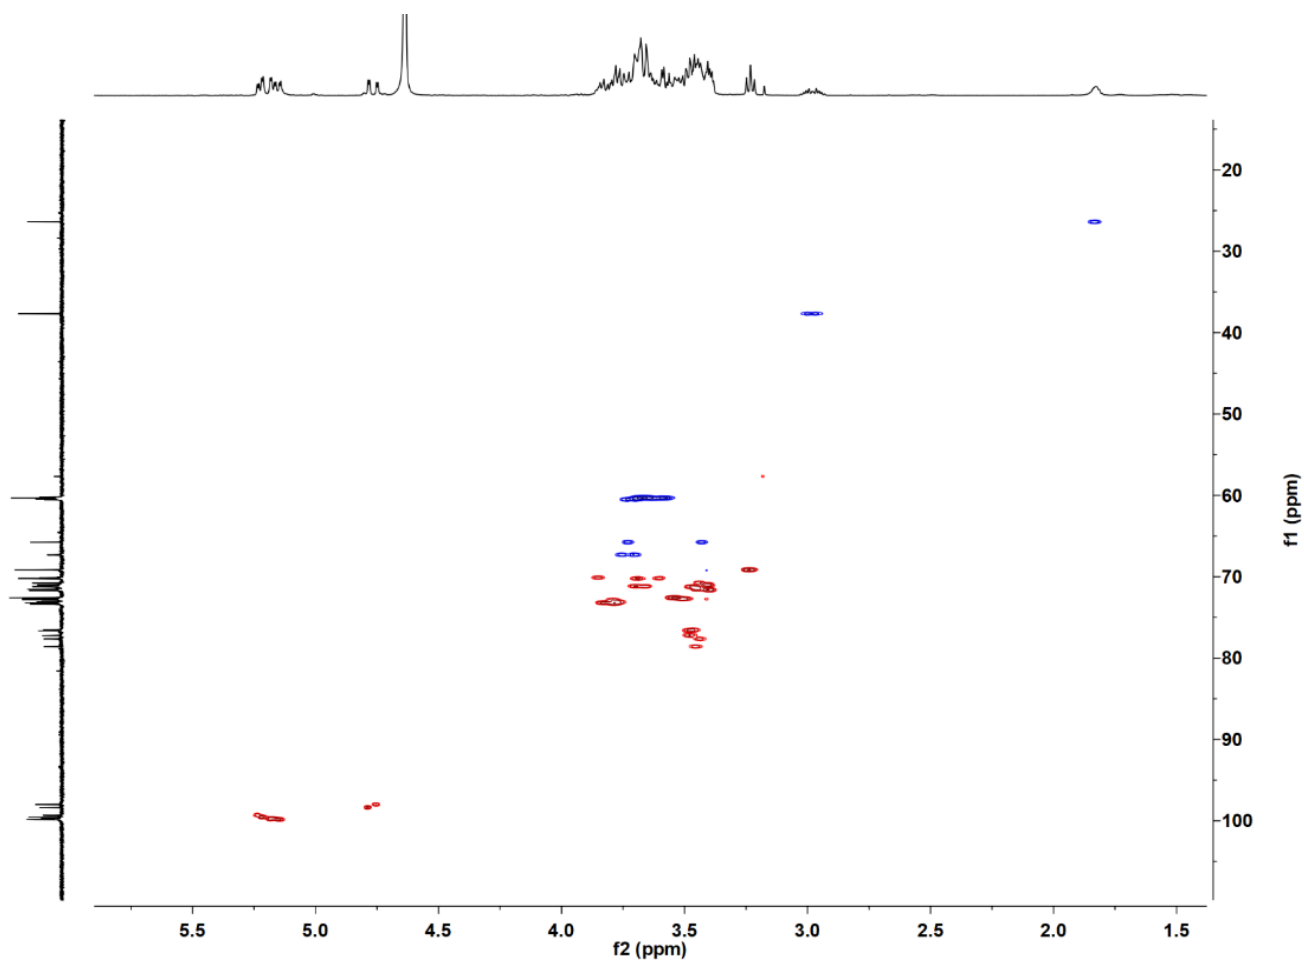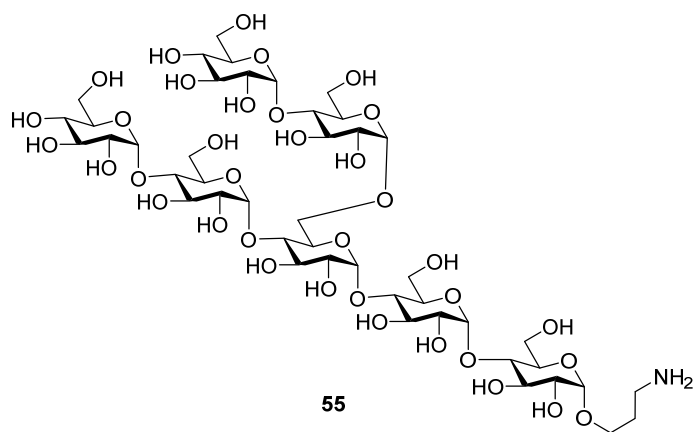

55  
<sup>1</sup>H-<sup>13</sup>C HSQC  
 600/150 MHz  
 D<sub>2</sub>O



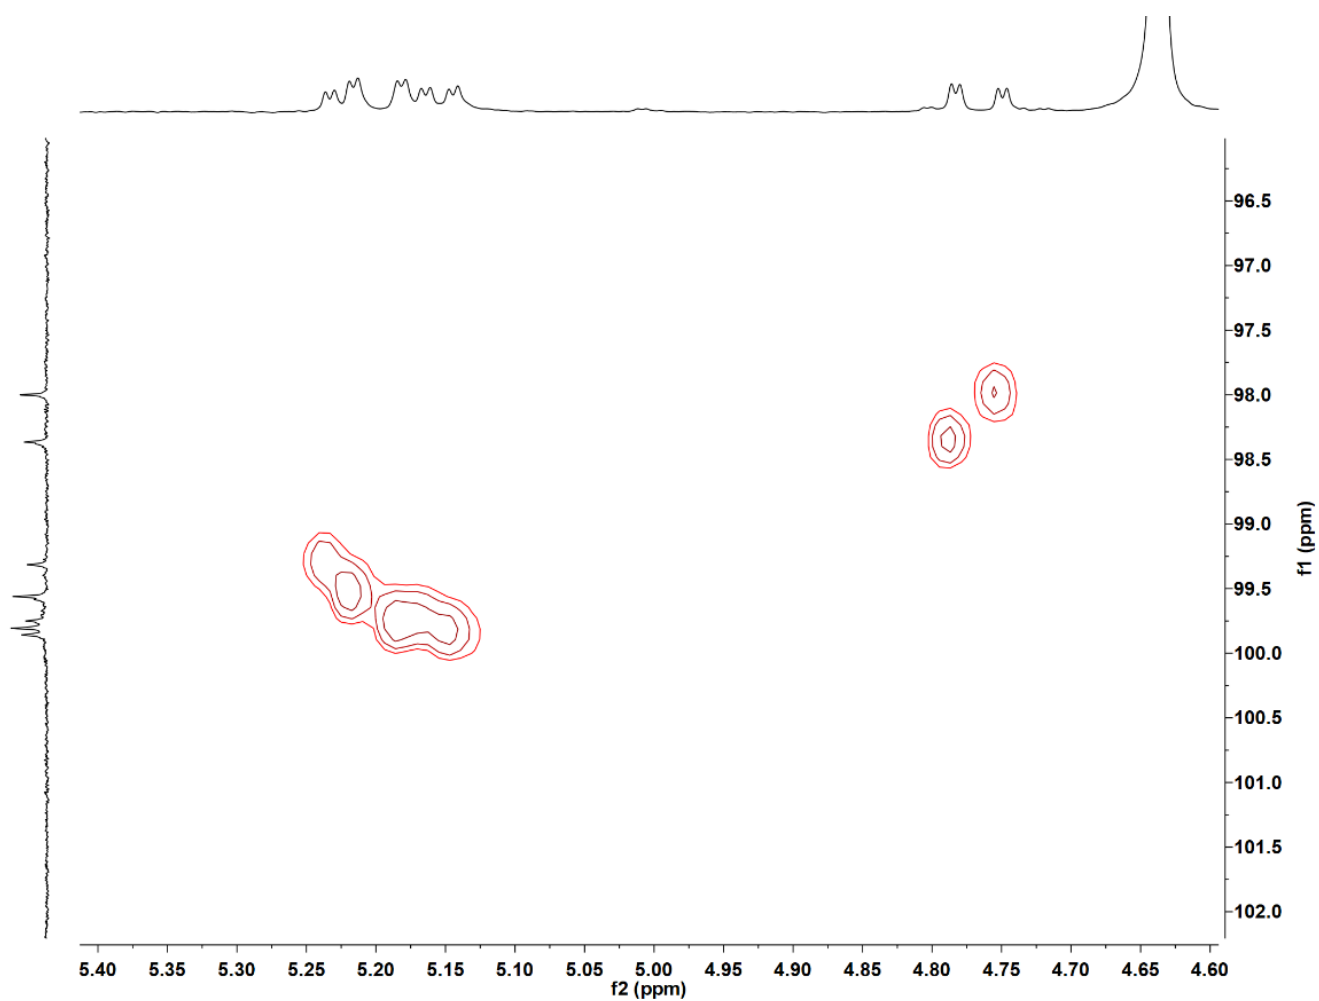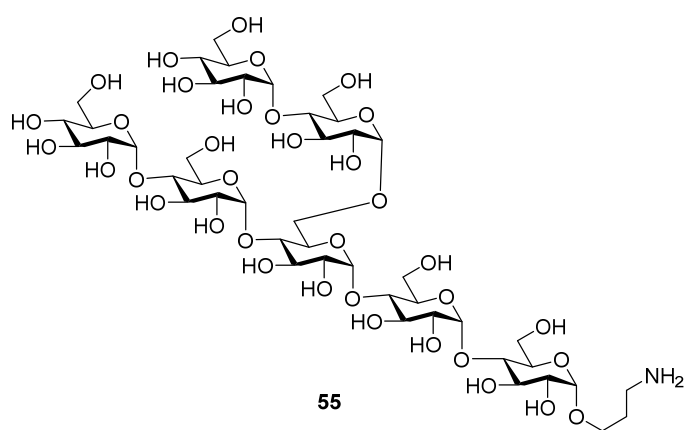

<sup>1</sup>H-<sup>13</sup>C HSQC  
600/150 MHz  
D<sub>2</sub>O

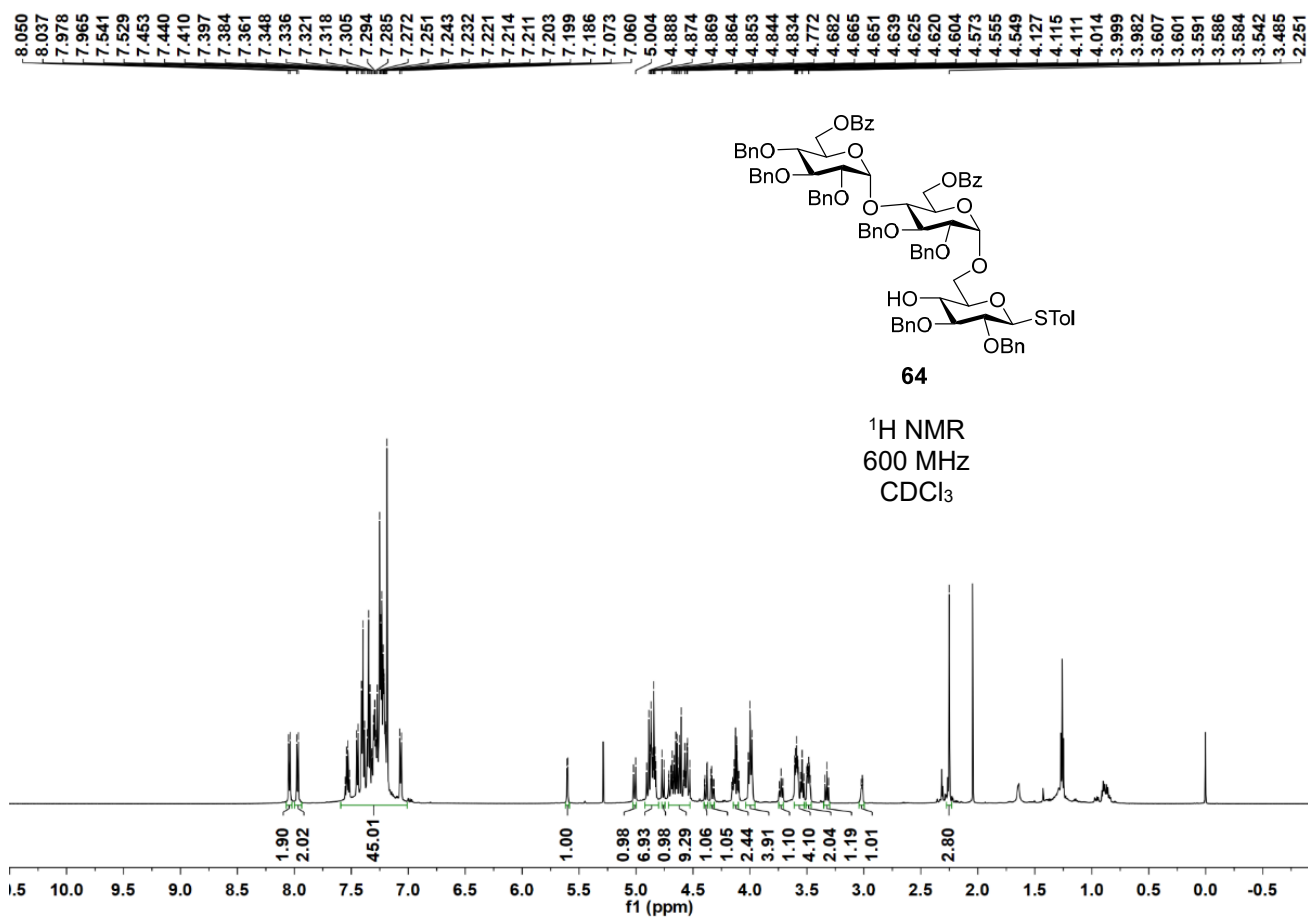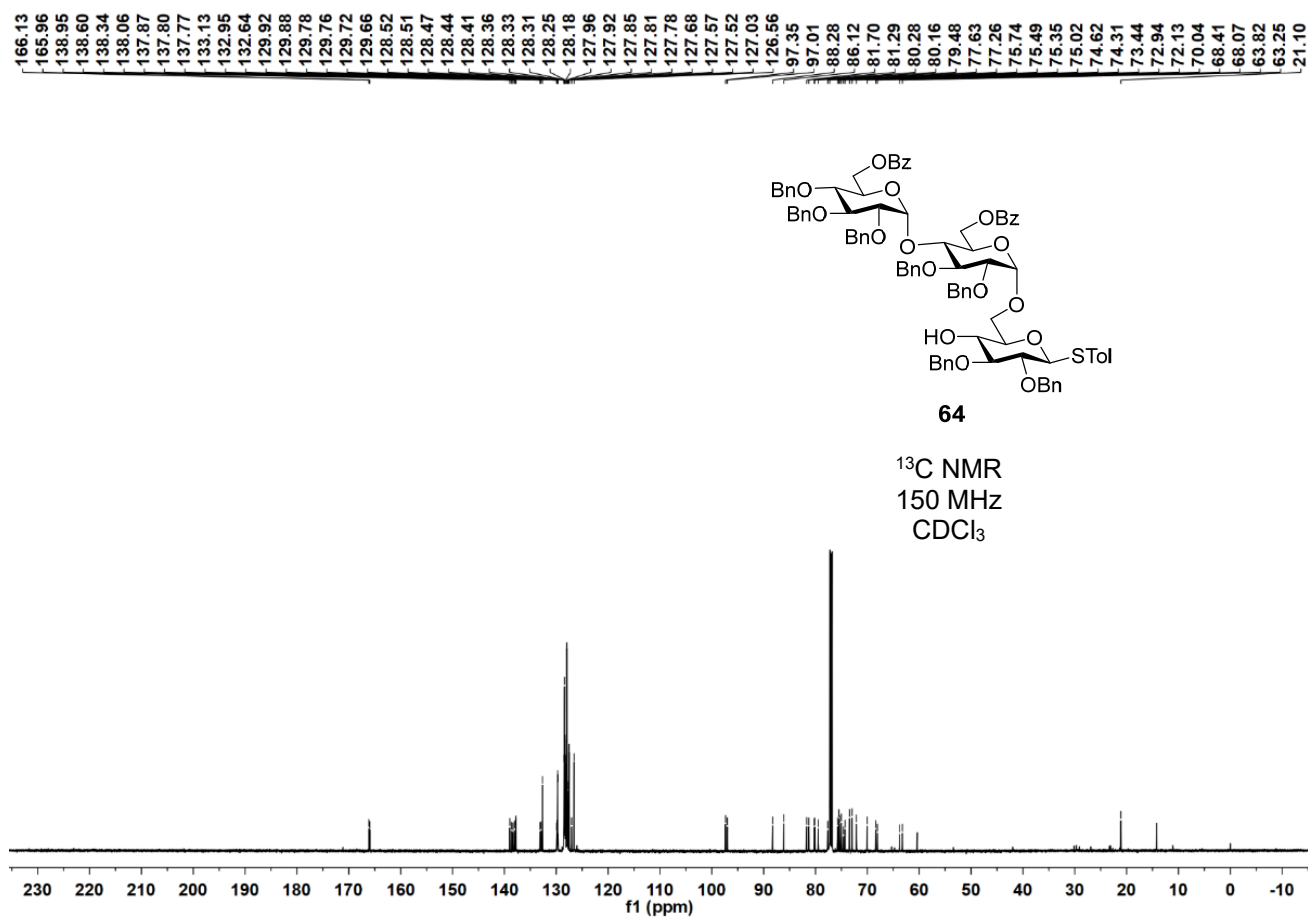

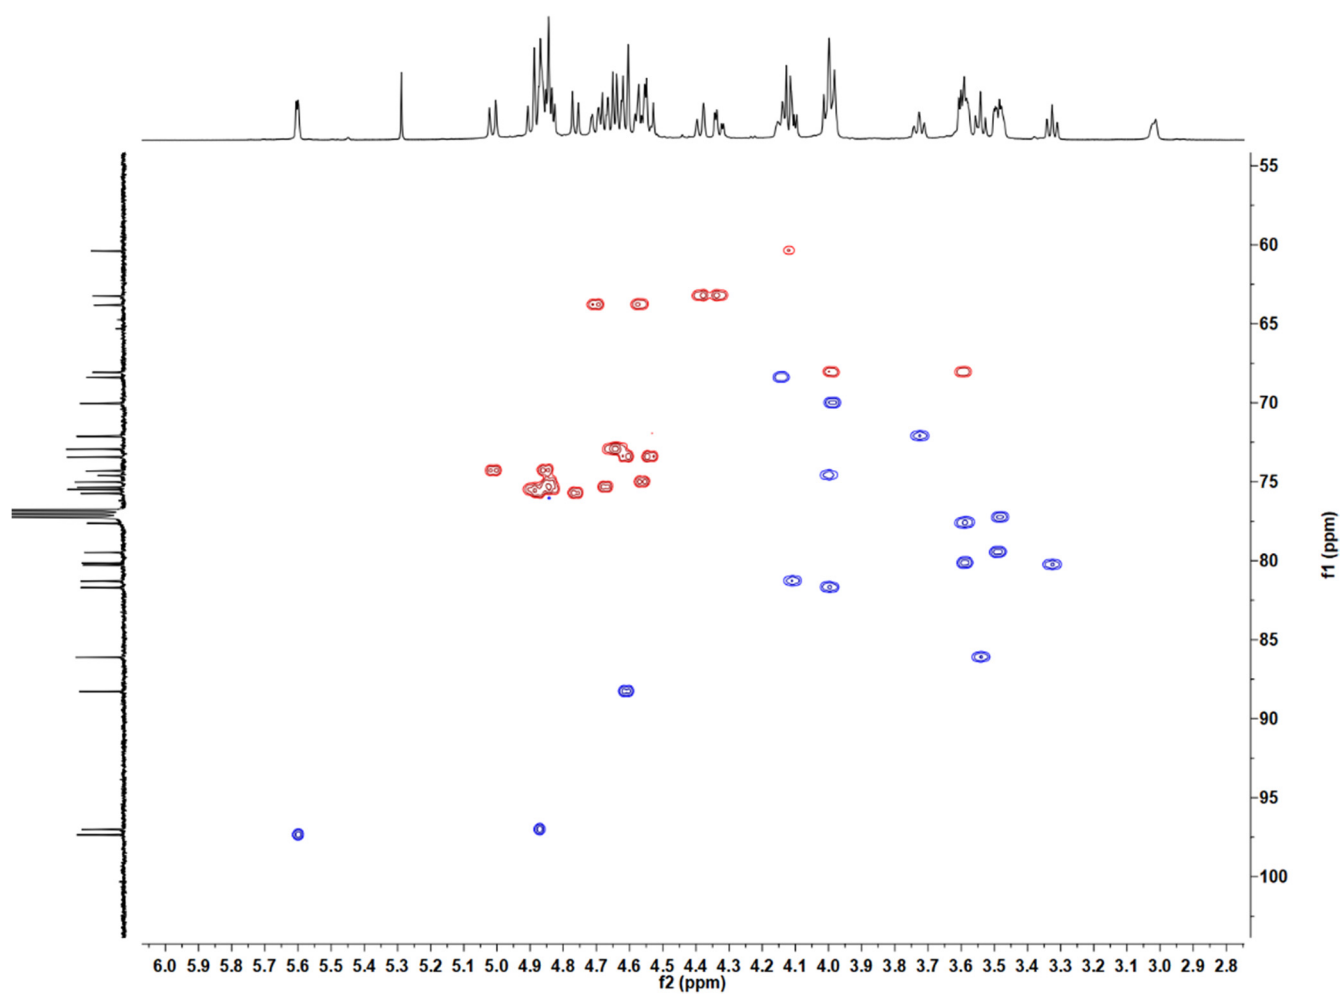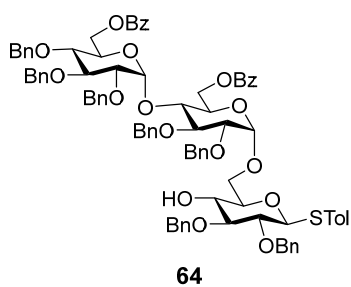

**64**  
 $^1\text{H}$ - $^{13}\text{C}$  HSQC  
 600/150 MHz  
 $\text{CDCl}_3$

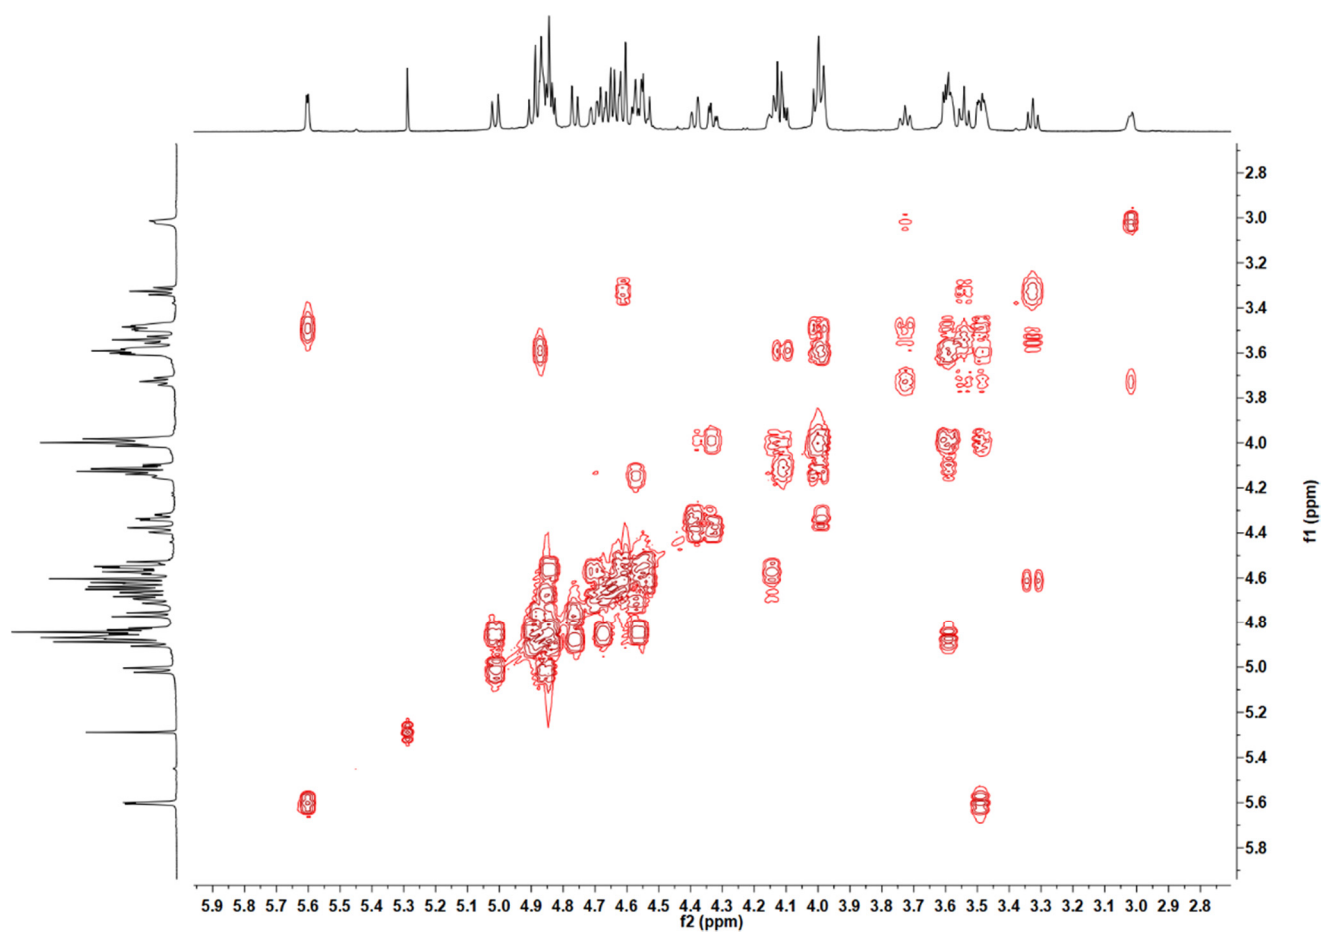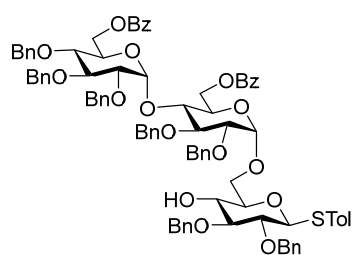

**64**

$^1\text{H}$ - $^1\text{H}$  COSY  
600 MHz  
 $\text{CDCl}_3$

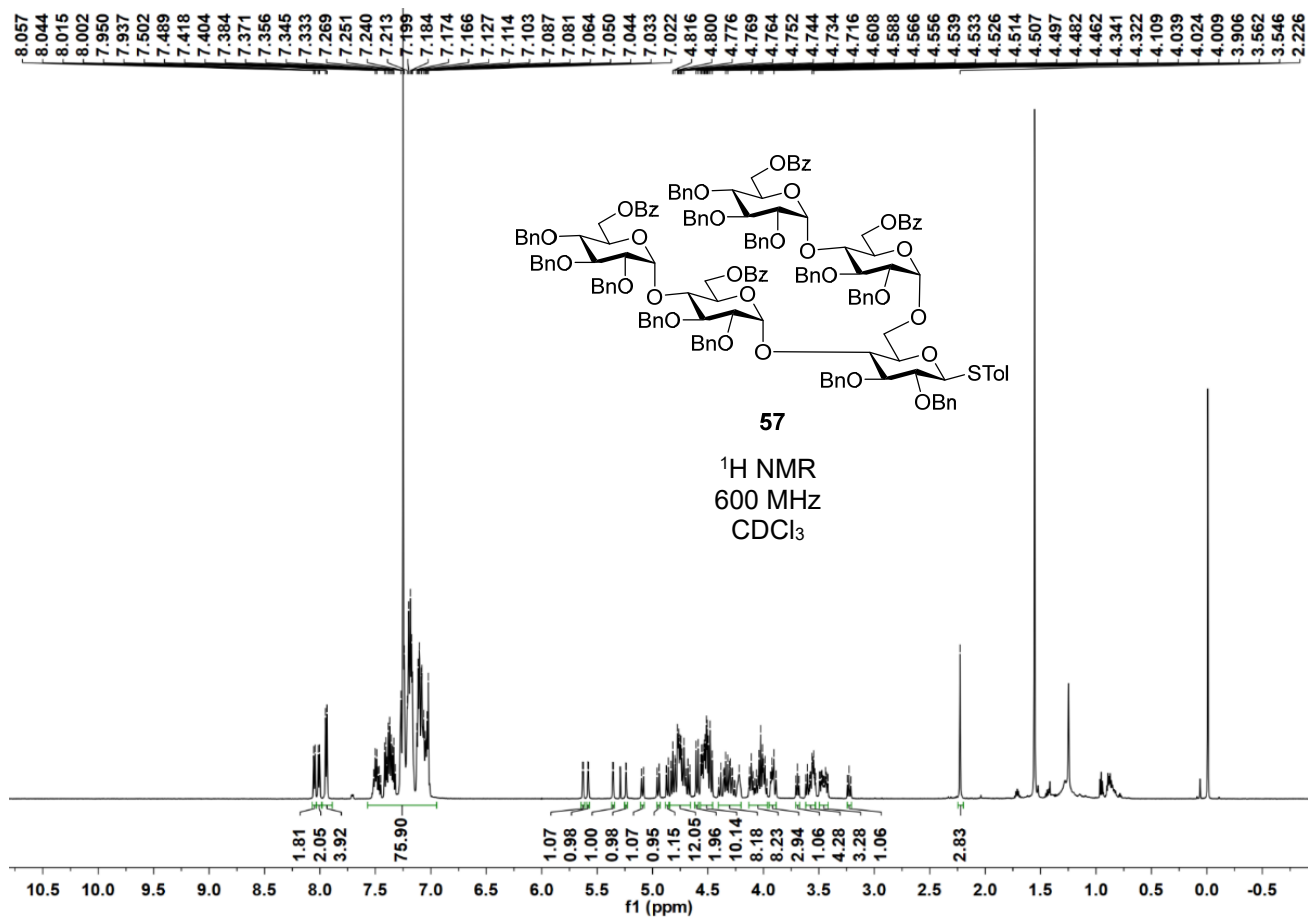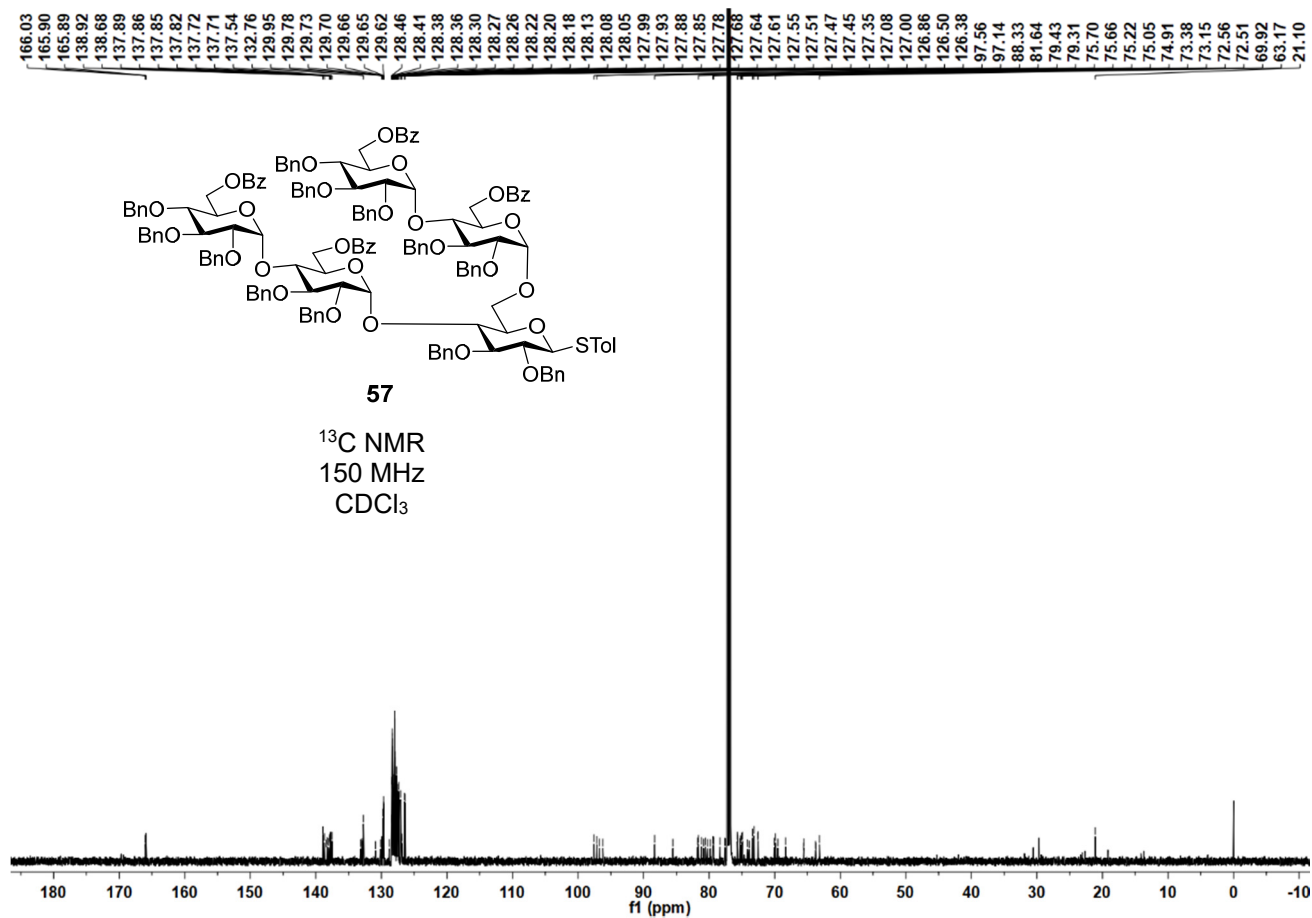

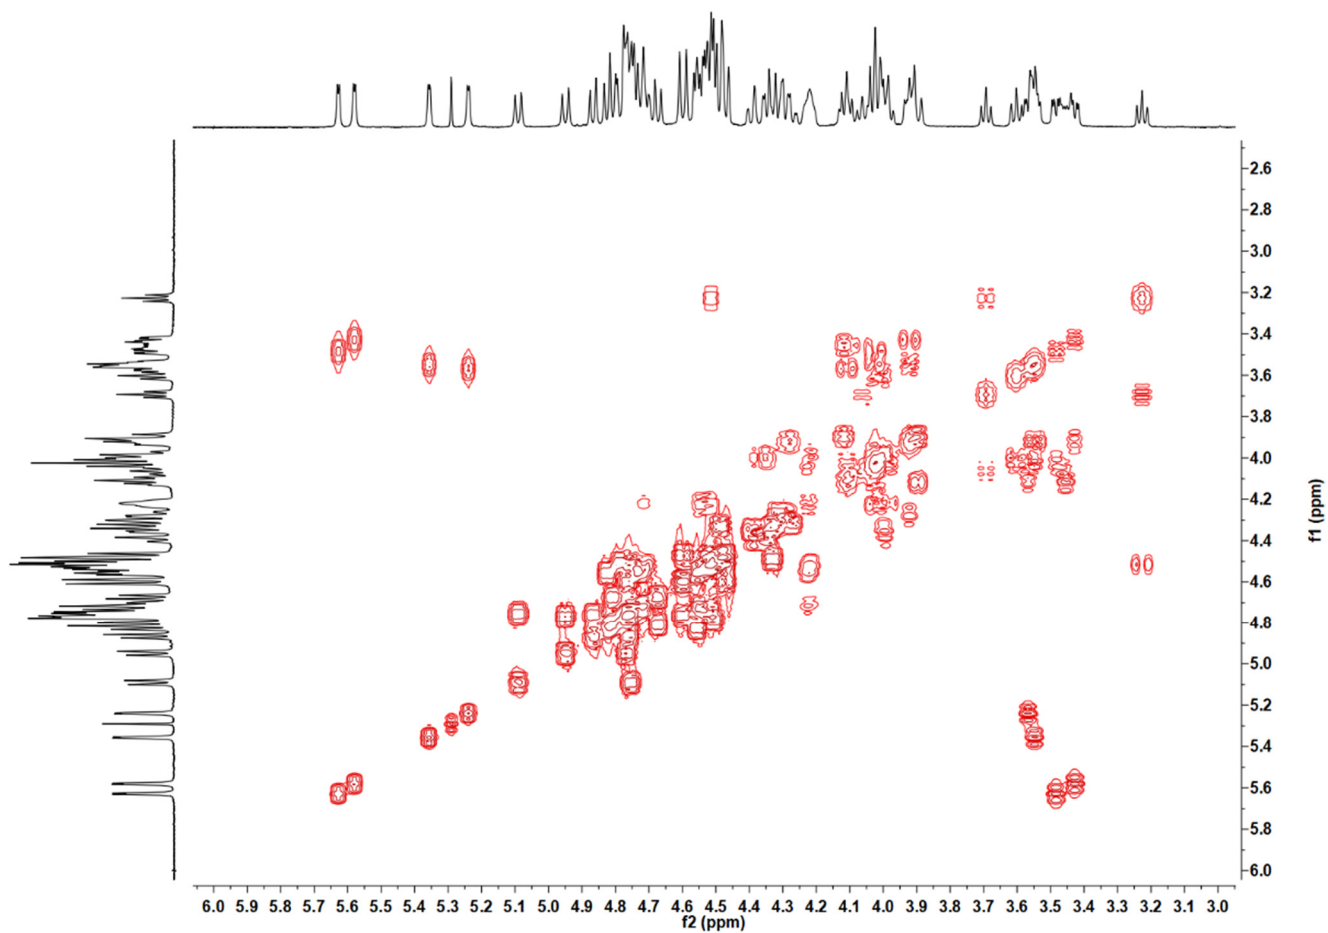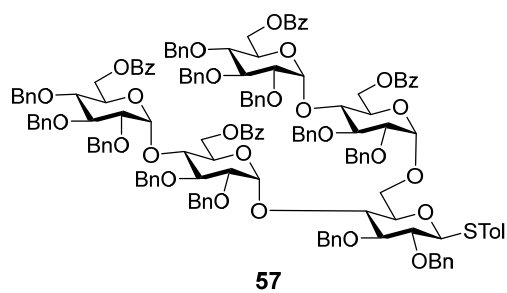

$^1\text{H}$ - $^1\text{H}$  COSY  
600 MHz  
 $\text{CDCl}_3$

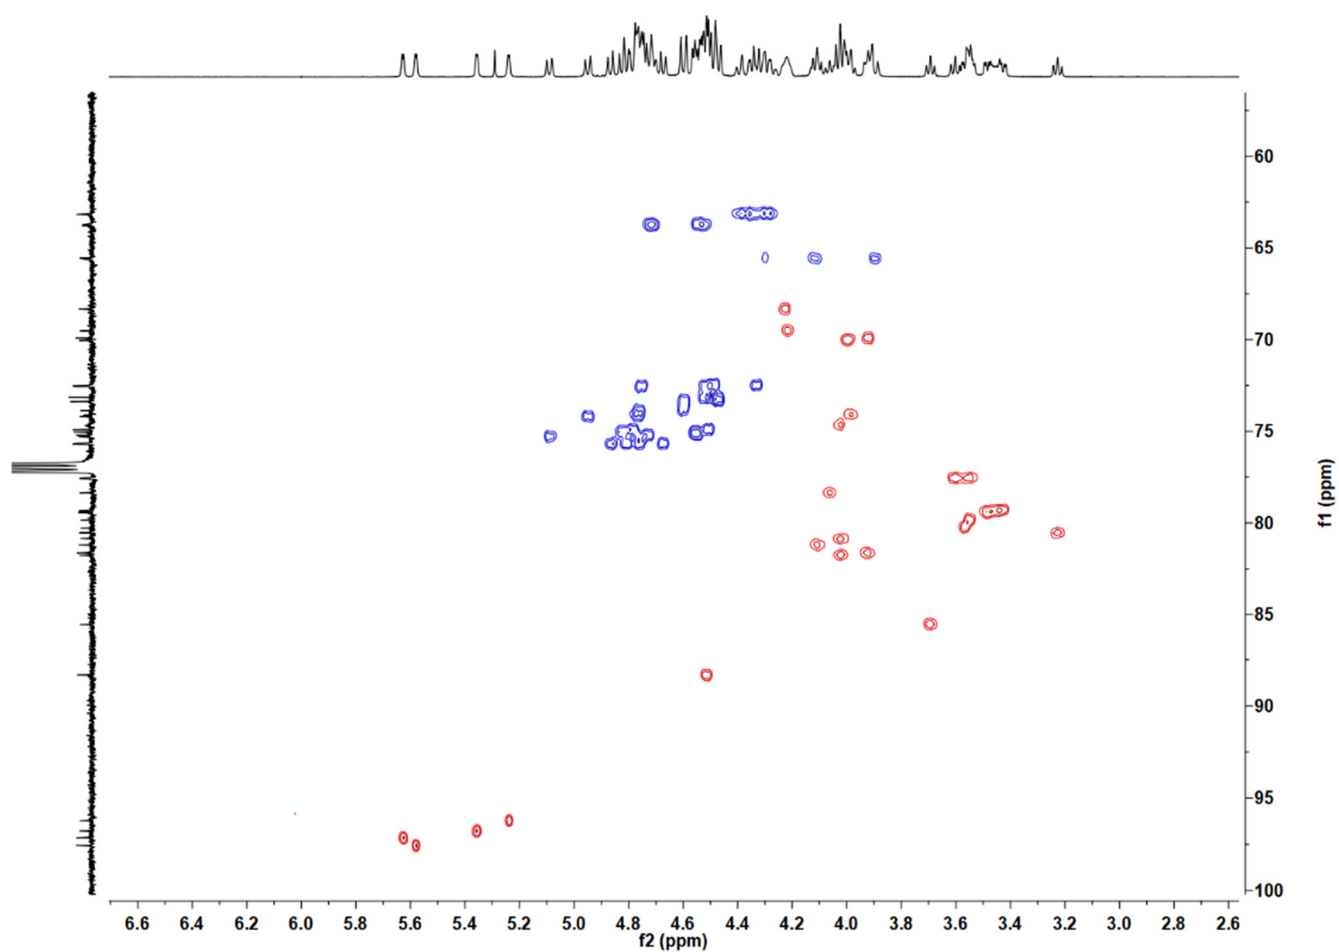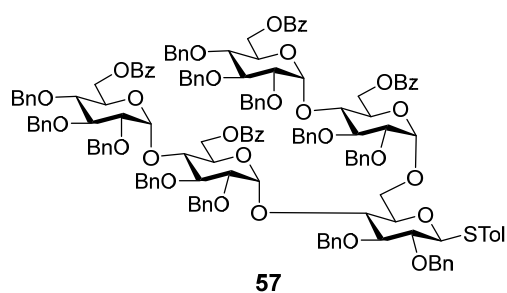

$^1\text{H}$ - $^{13}\text{C}$  HSQC  
600/150 MHz  
 $\text{CDCl}_3$
